# Supplementary material for: System dynamic modelling of healthcare associated influenza -a tool for infection control
Source: Springer Nature journal article supplement (doi:10.1186/s12913-022-07959-7), 2022-05-27
Supplement: MOESM2 [file 23088548]

### Not influenza

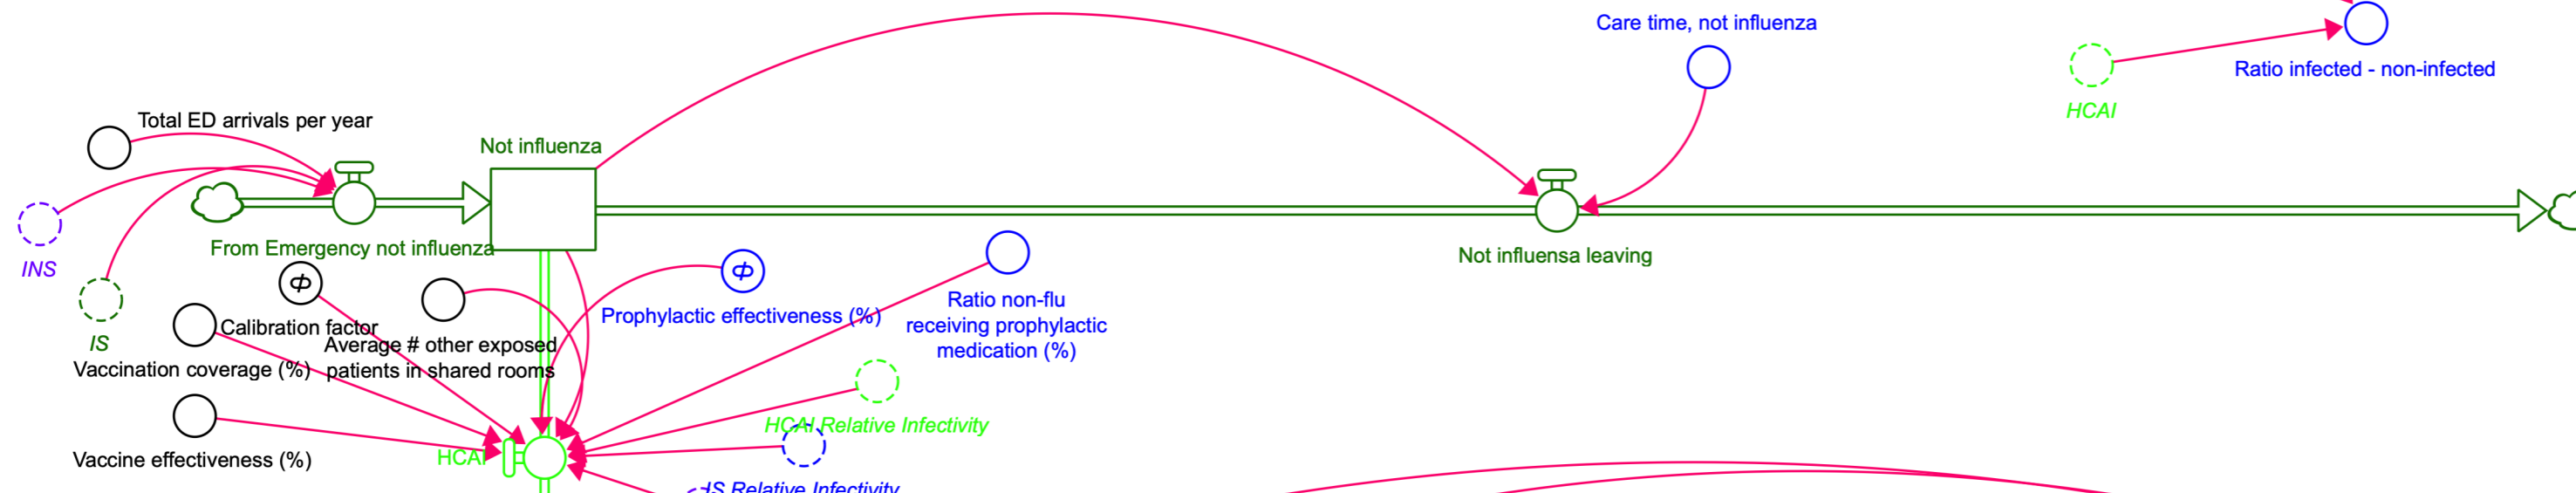

### Influenza healthcare-associated (HCAI)

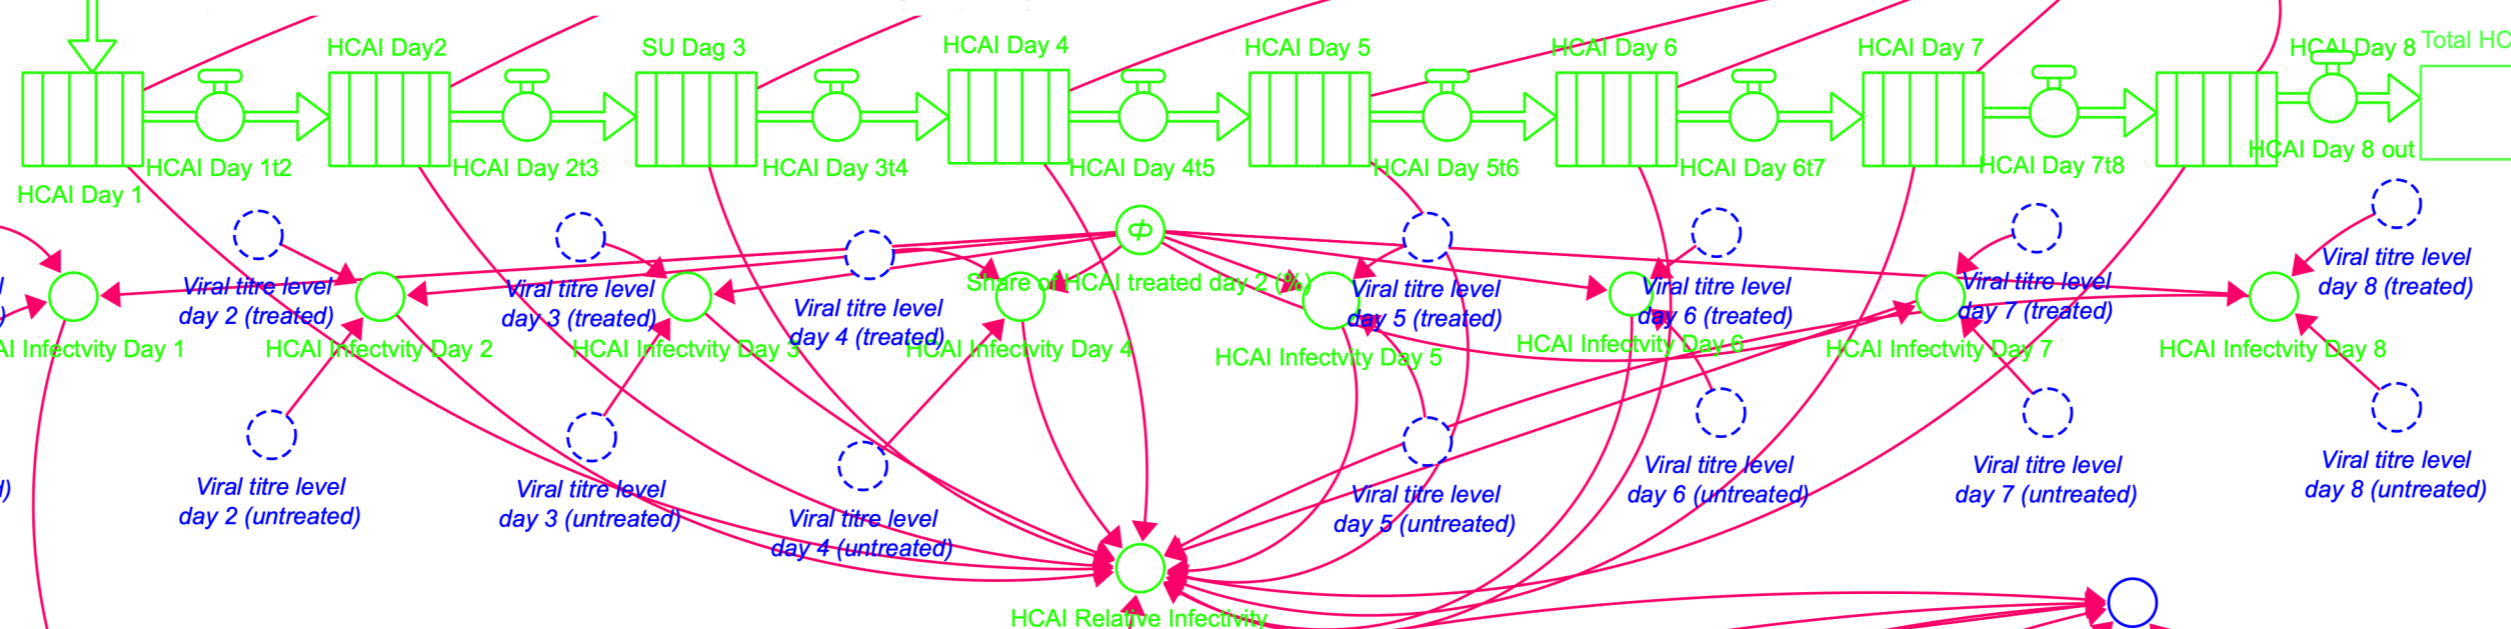

### Influenza suspected (IS)

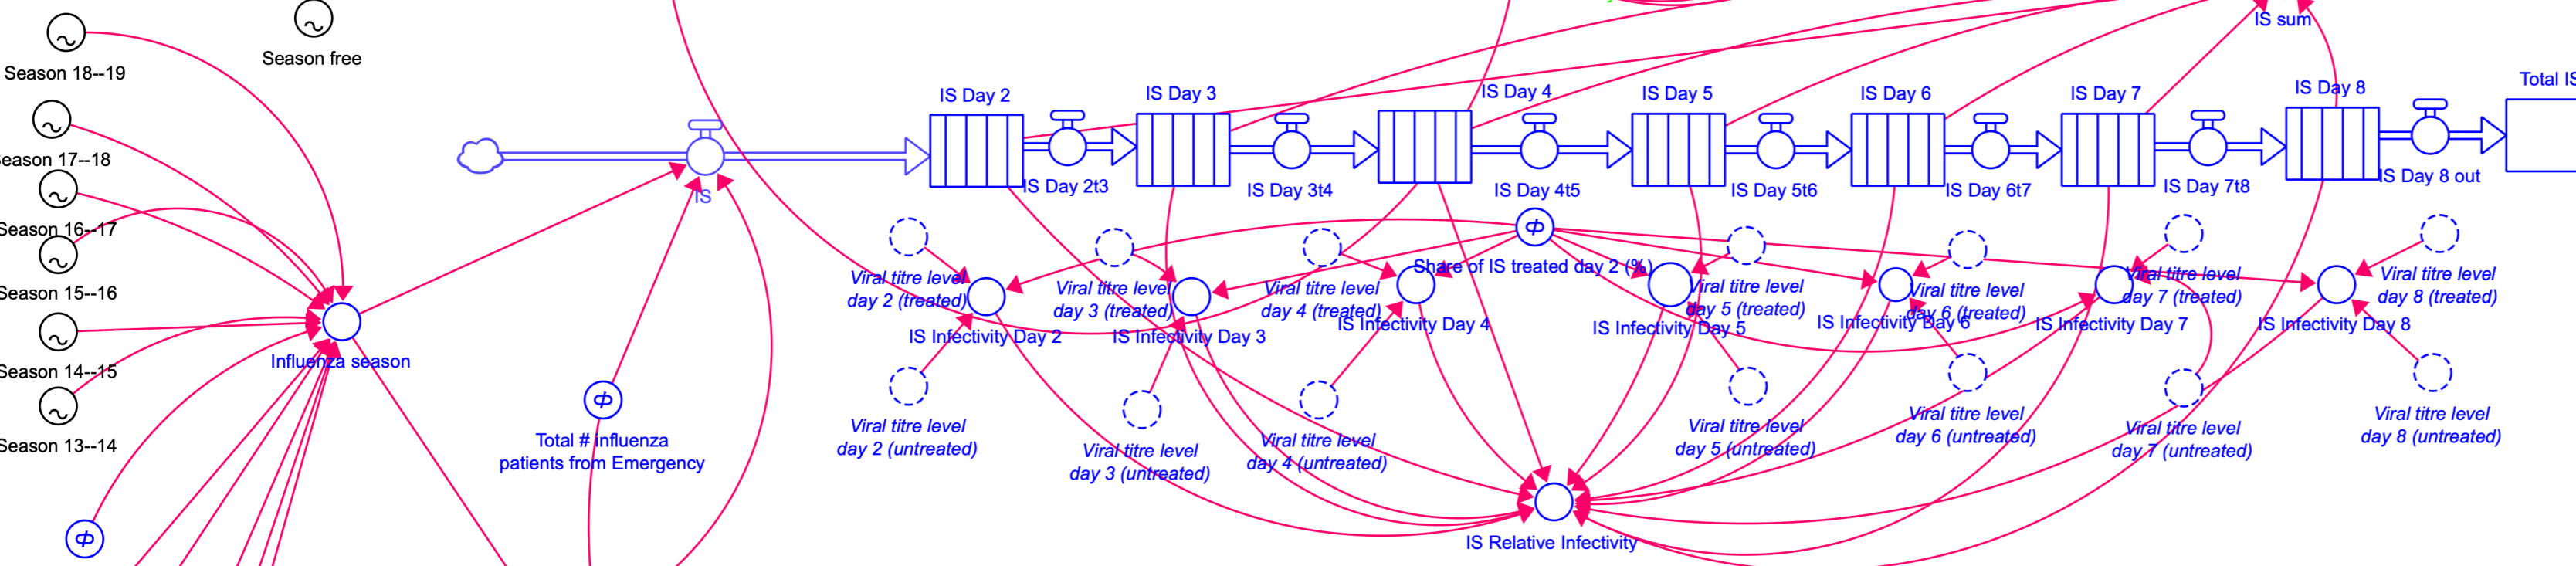

### Influenza non suspected (INS)

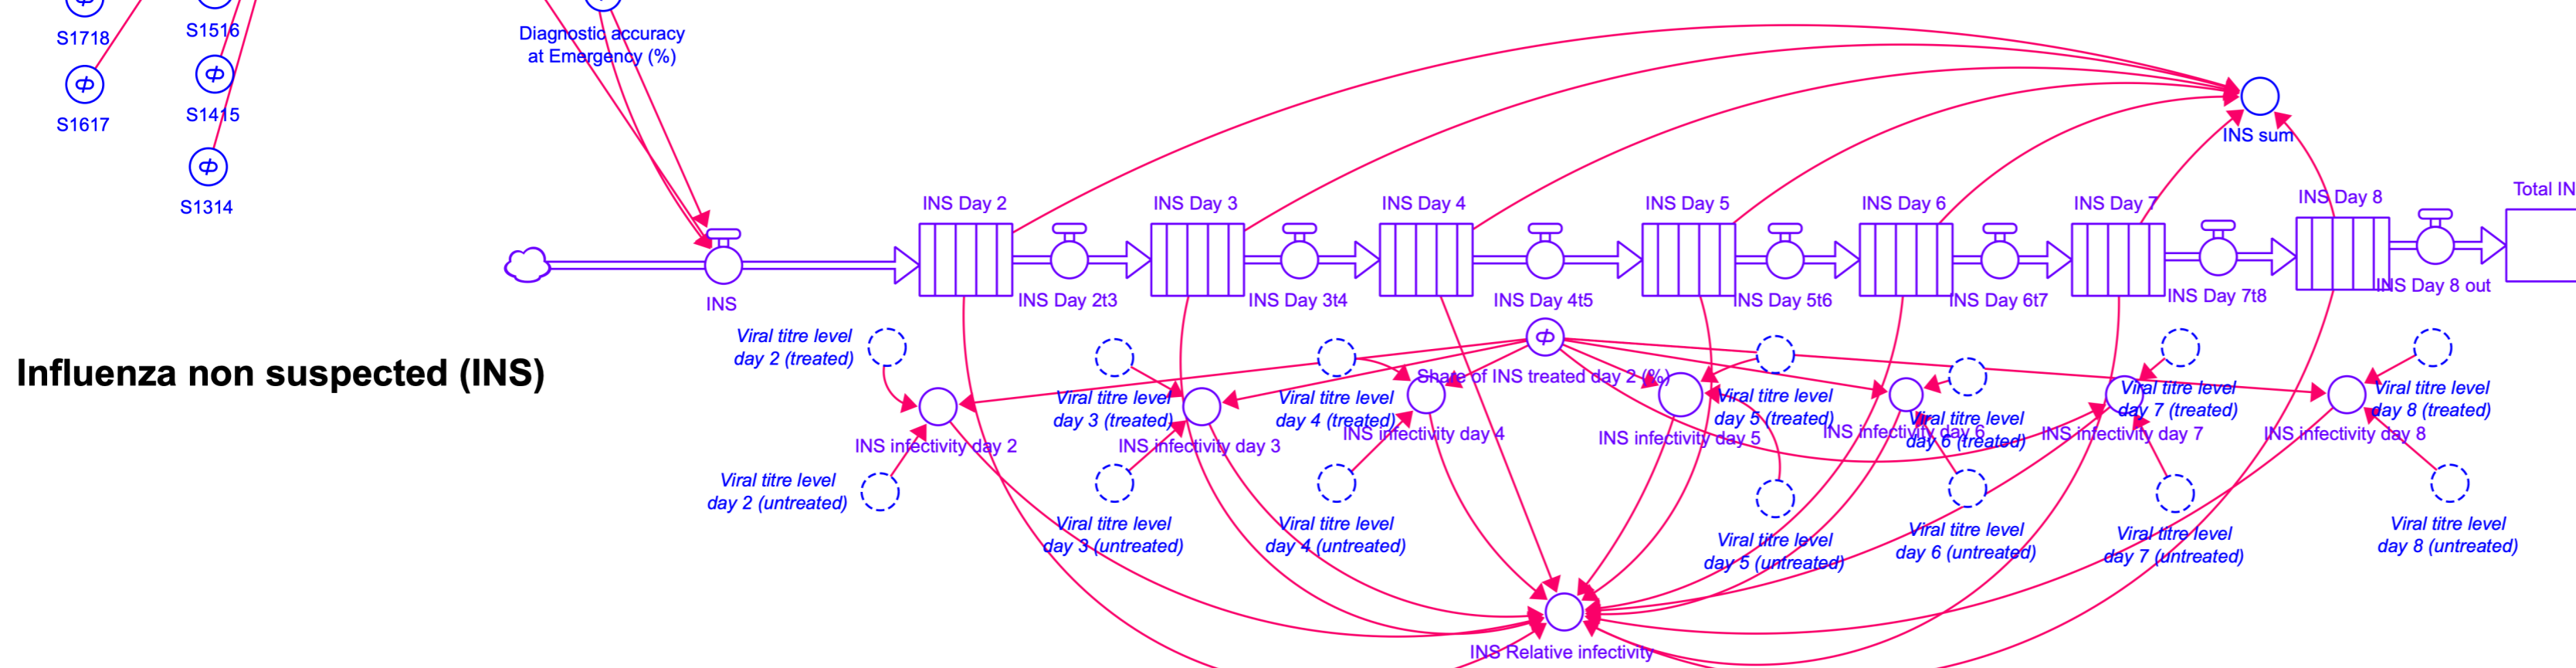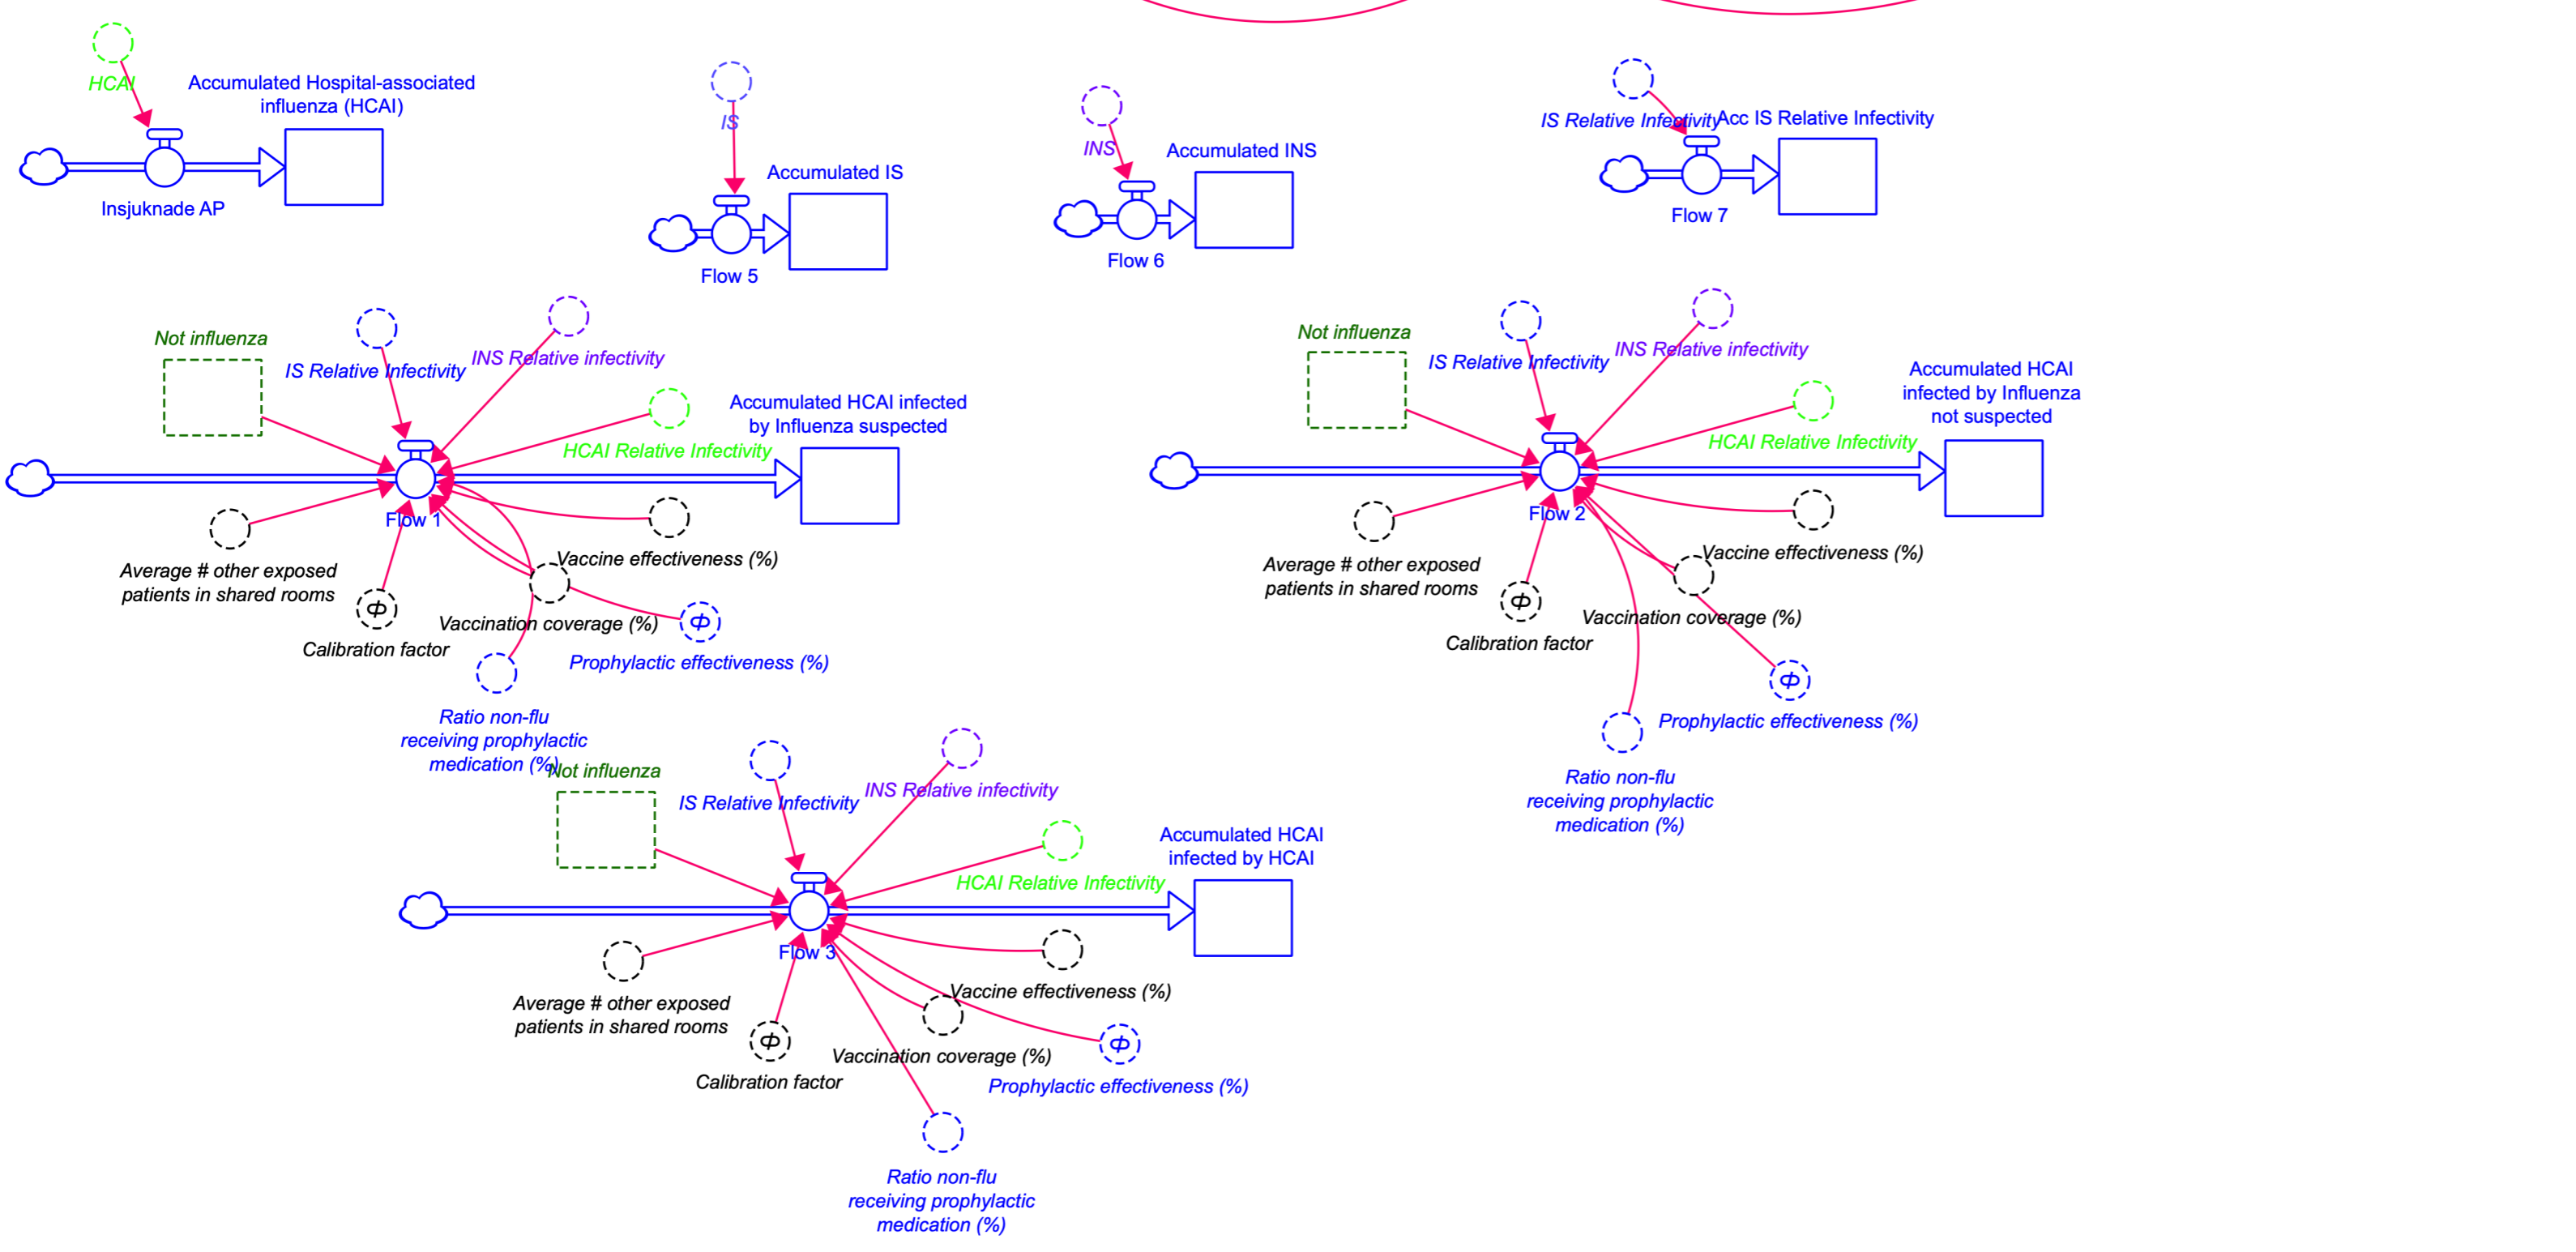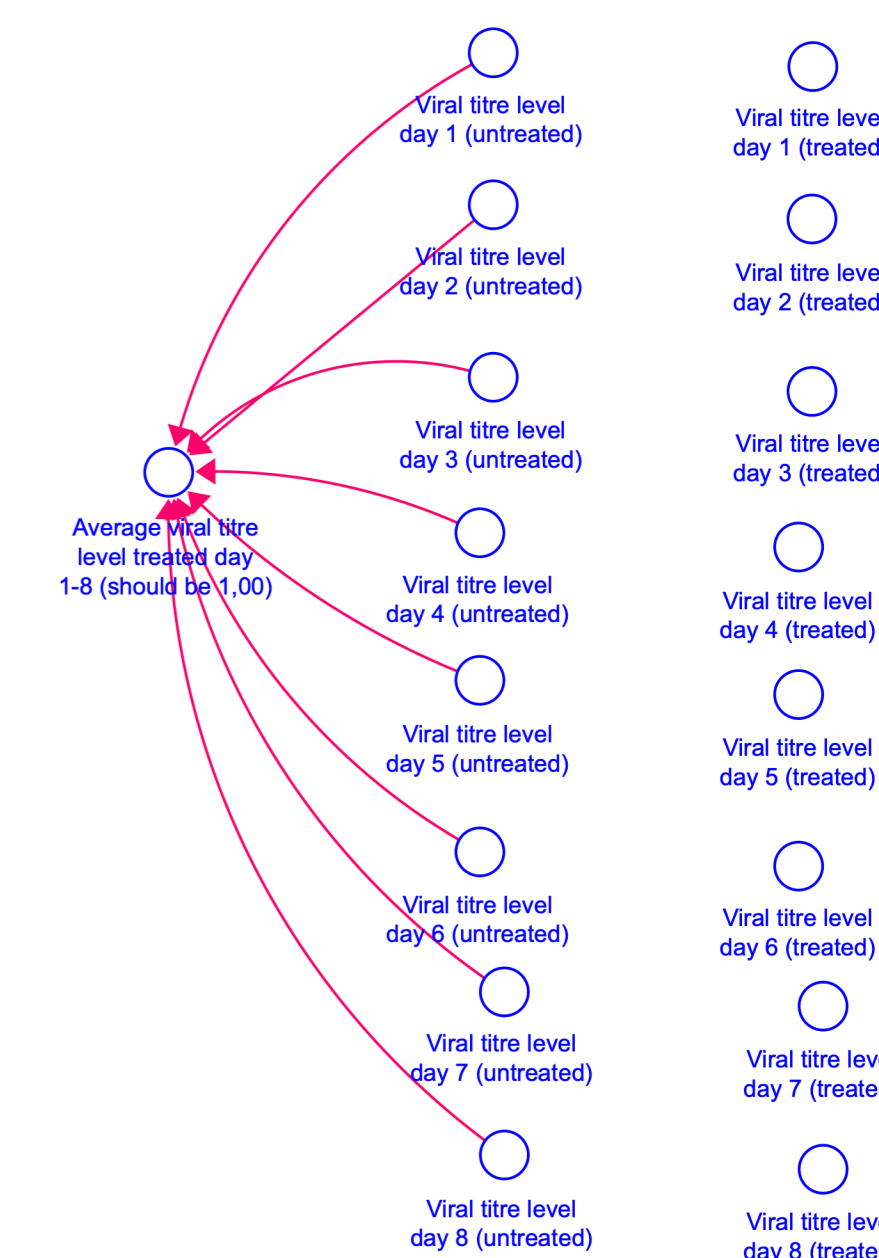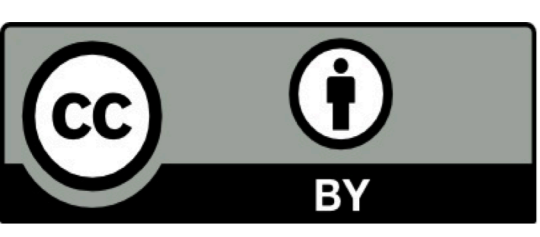

## Exposure

Average # other exposed patients in shared rooms

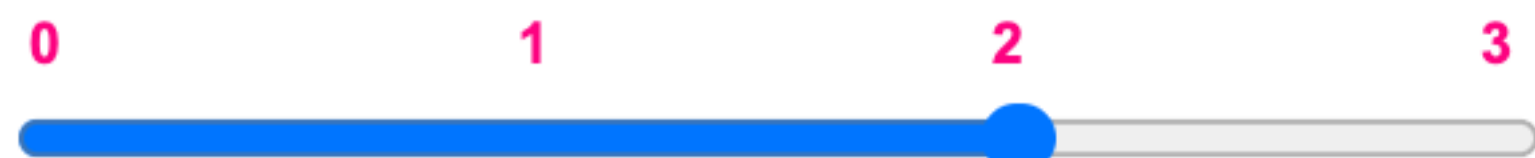

## Susceptibility

Vaccination coverage (%)

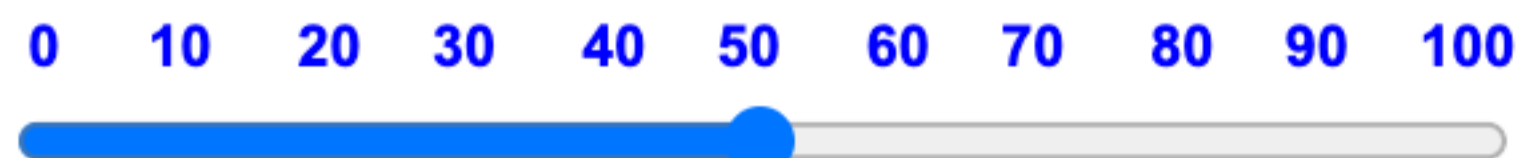

Vaccine effectiveness (%)

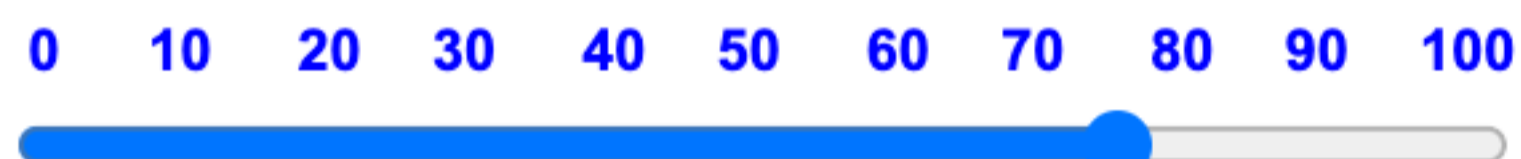

Ratio non-flu receiving prophylactic medication (%)

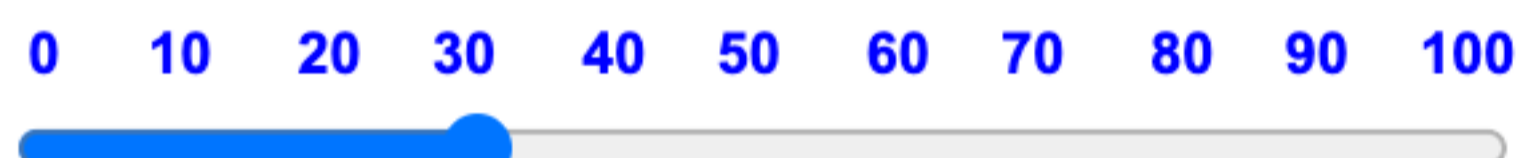

Prophylactic effectiveness (%)

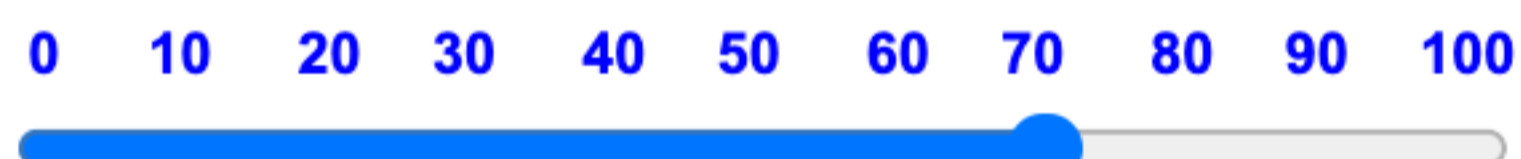

## Actions

Share of IS treated day 2 (%)

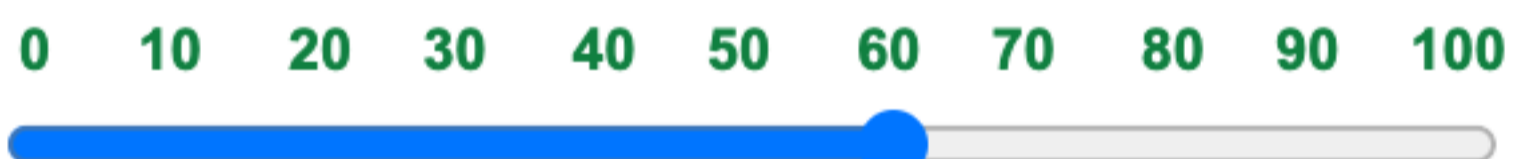

Share of INS treated day 2 (%)

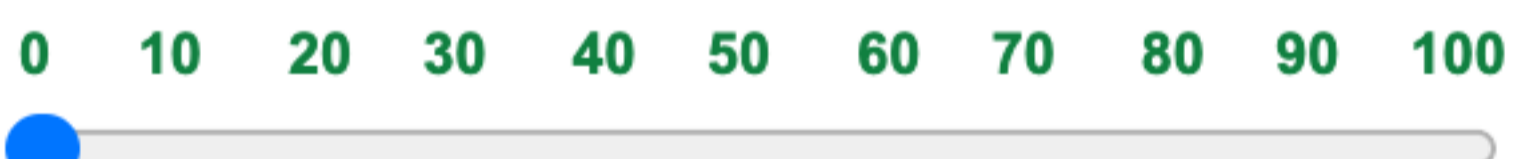

Share of HCAI treated day 2 (%)

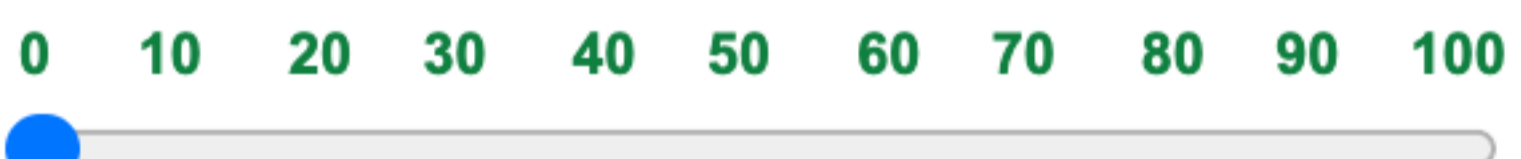

Diagnostic accuracy at Emergency (%)

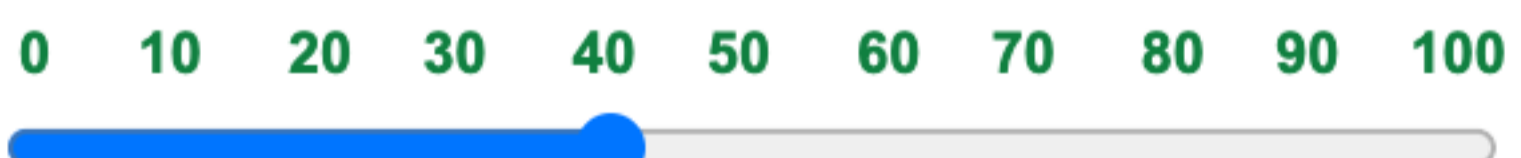

|                                                      |     |
|------------------------------------------------------|-----|
| Accumulated Hospital-associated influenza (HCAI)     | 111 |
| Accumulated HCAI infected by Influenza suspected     | 33  |
| Accumulated HCAI infected by Influenza not suspected | 57  |
| Accumulated HCAI infected by HCAI                    | 22  |

Calibration factor

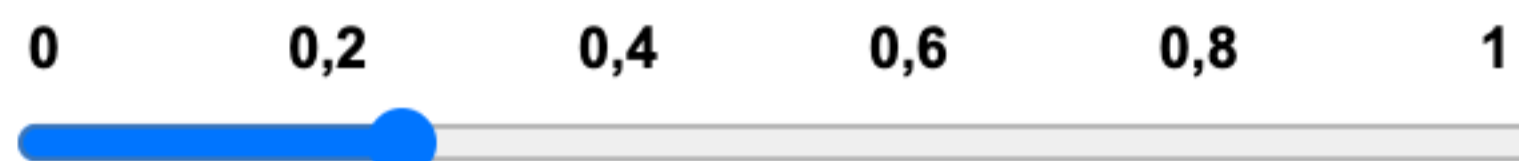

## Variables

Total # influenza patients from Emergency

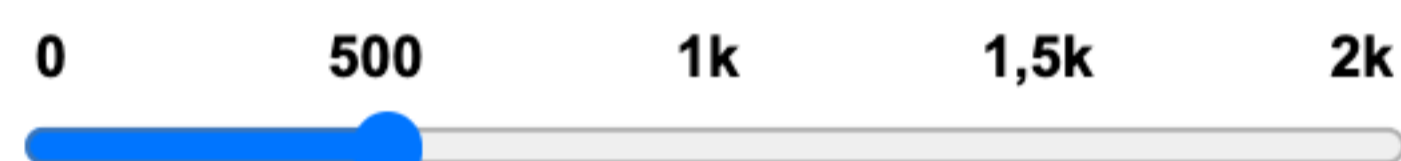

Season selector

- Season 2013-14
- Season 2014-15
- Season 2015-16
- Season 2016-17
- Season 2017-18
- Season 2018-19

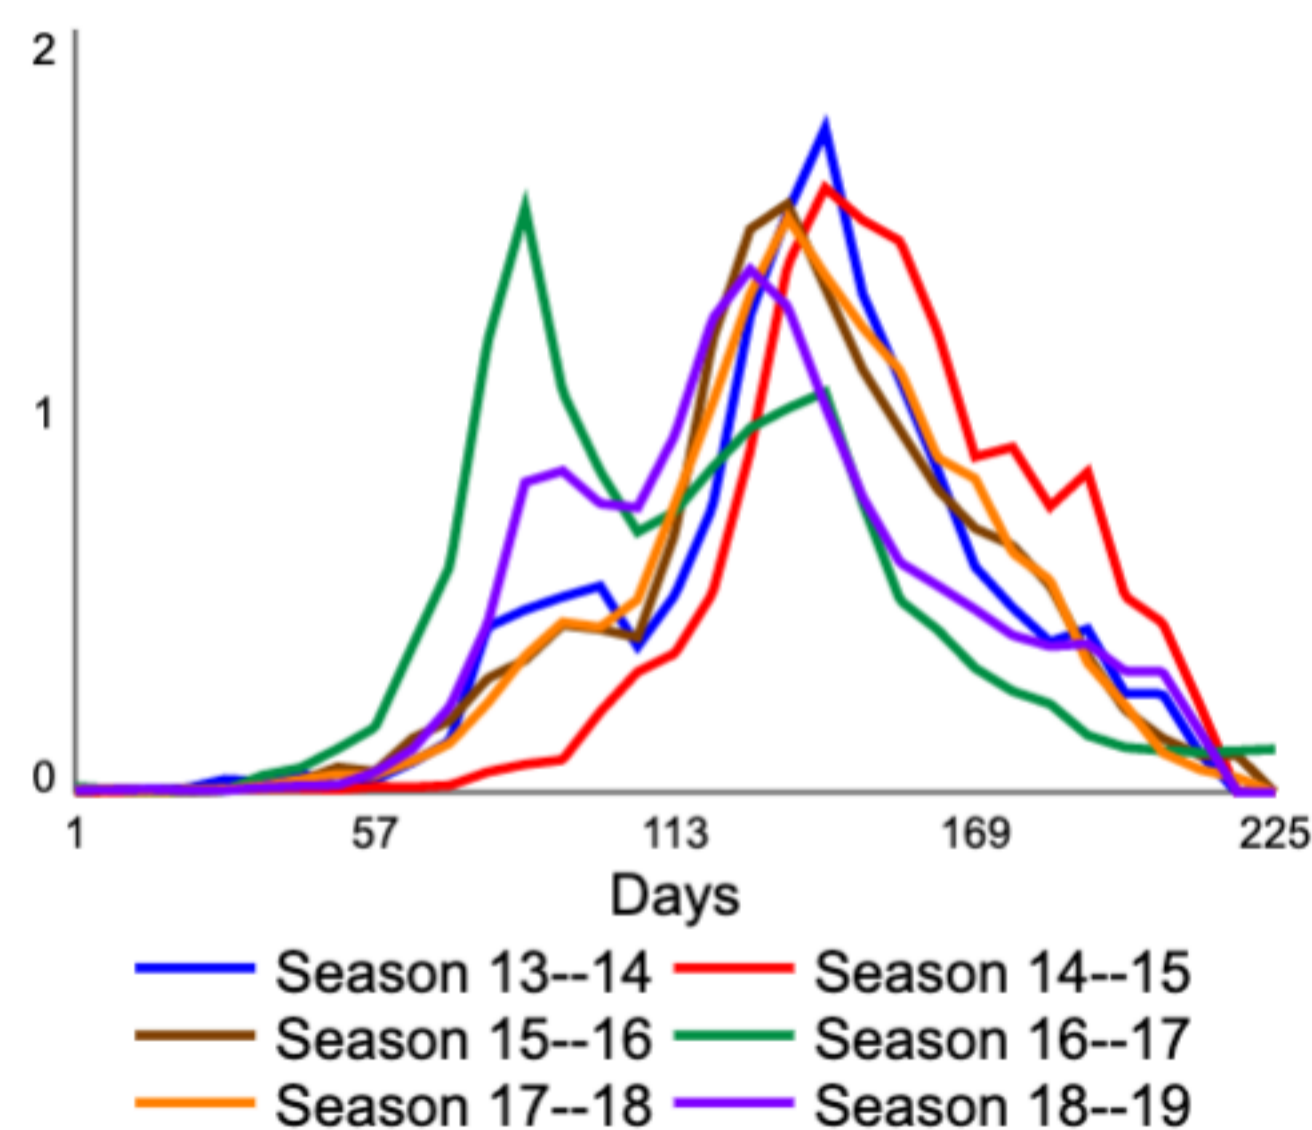

Run Live (real time)

Single run

Stop Live

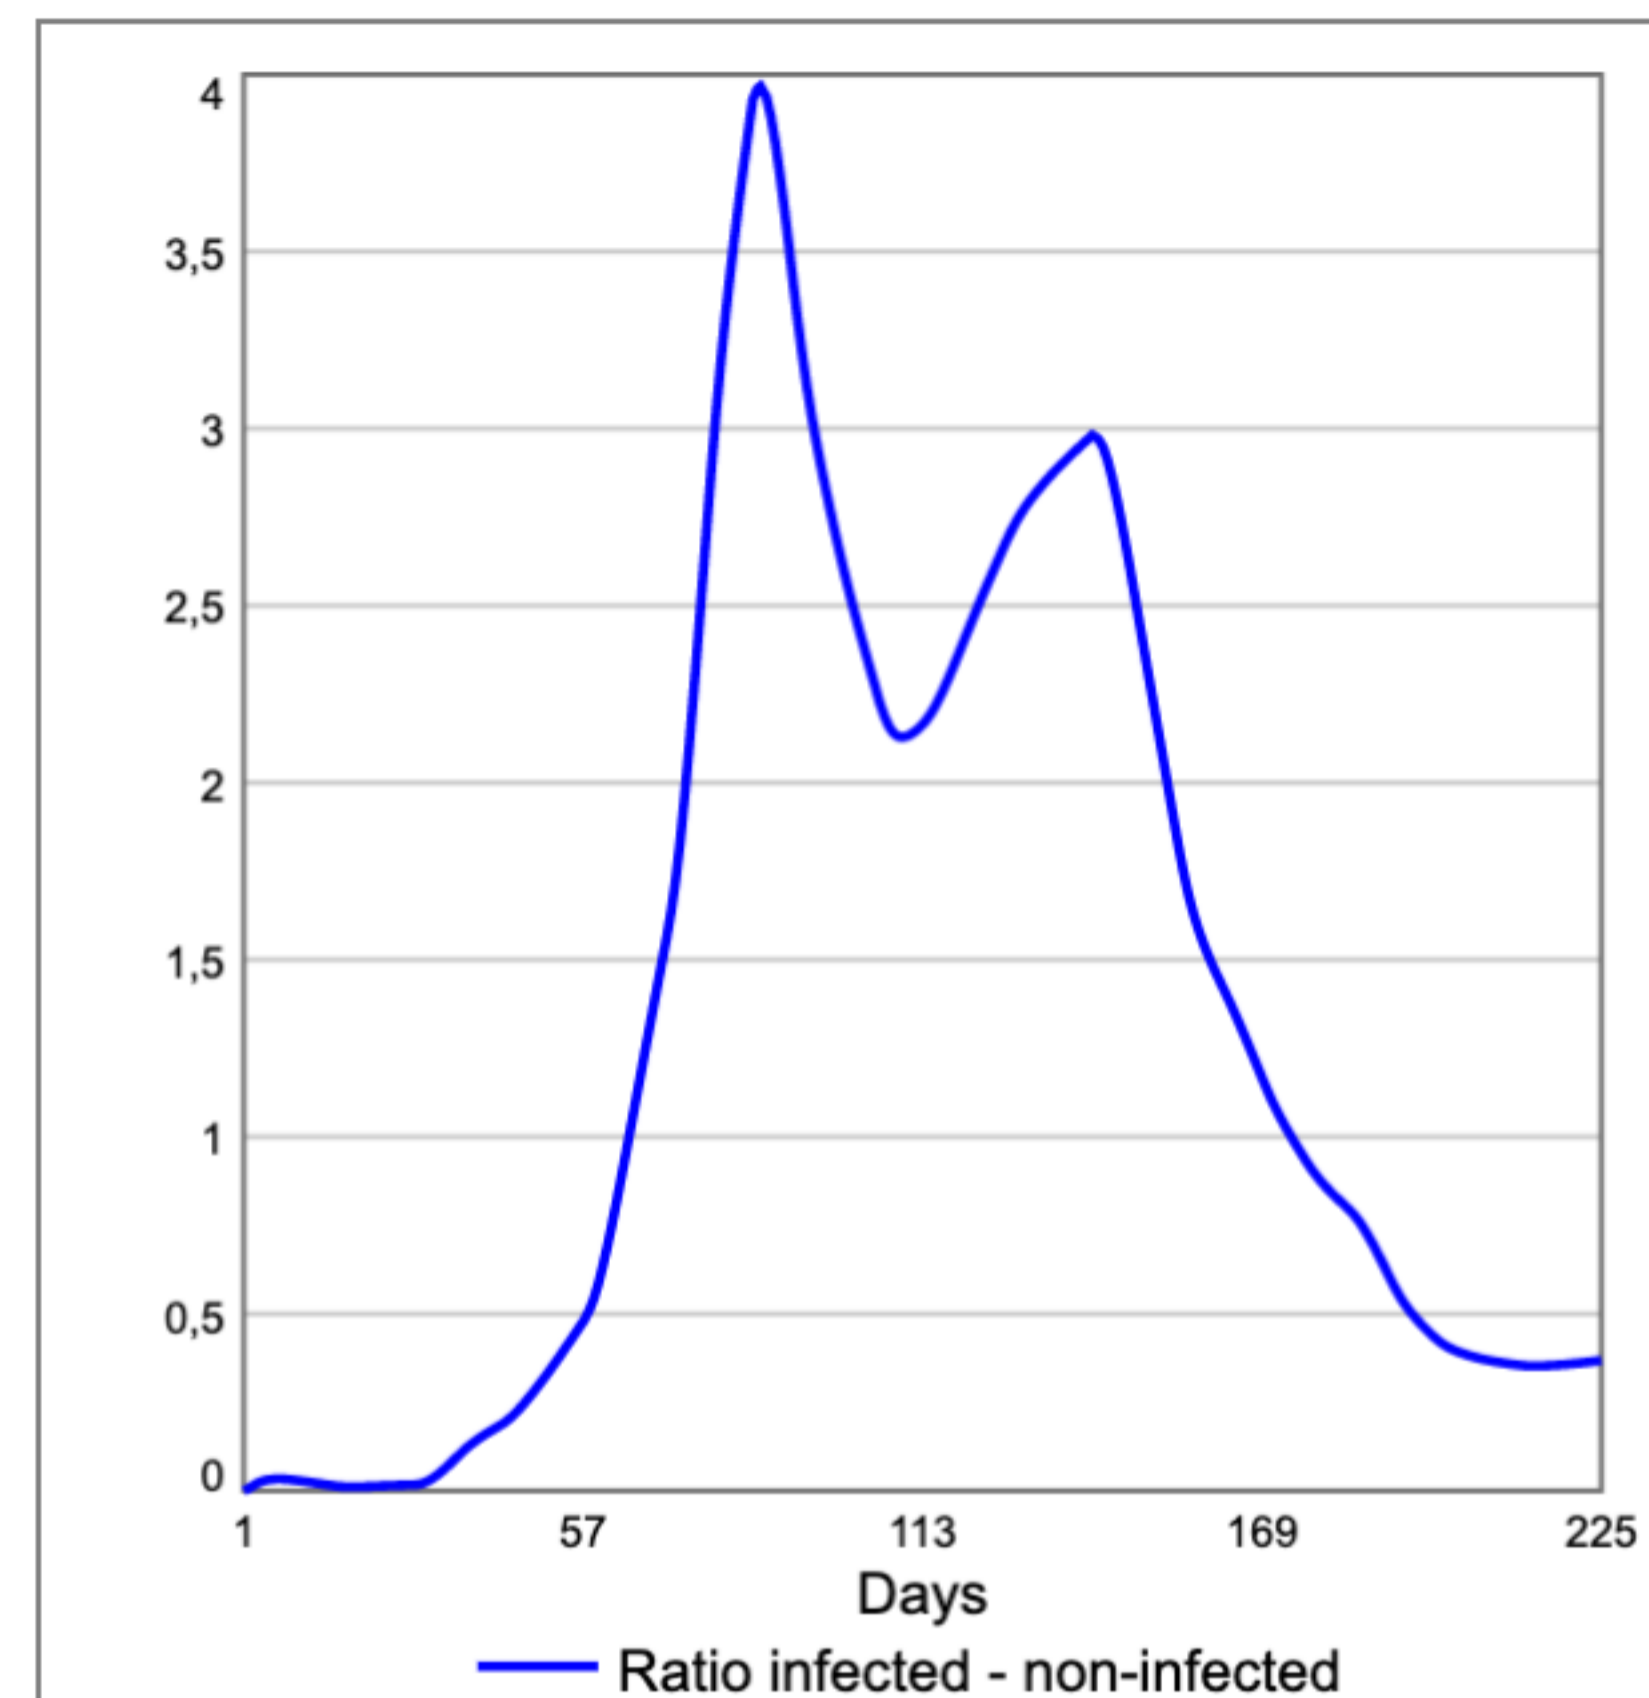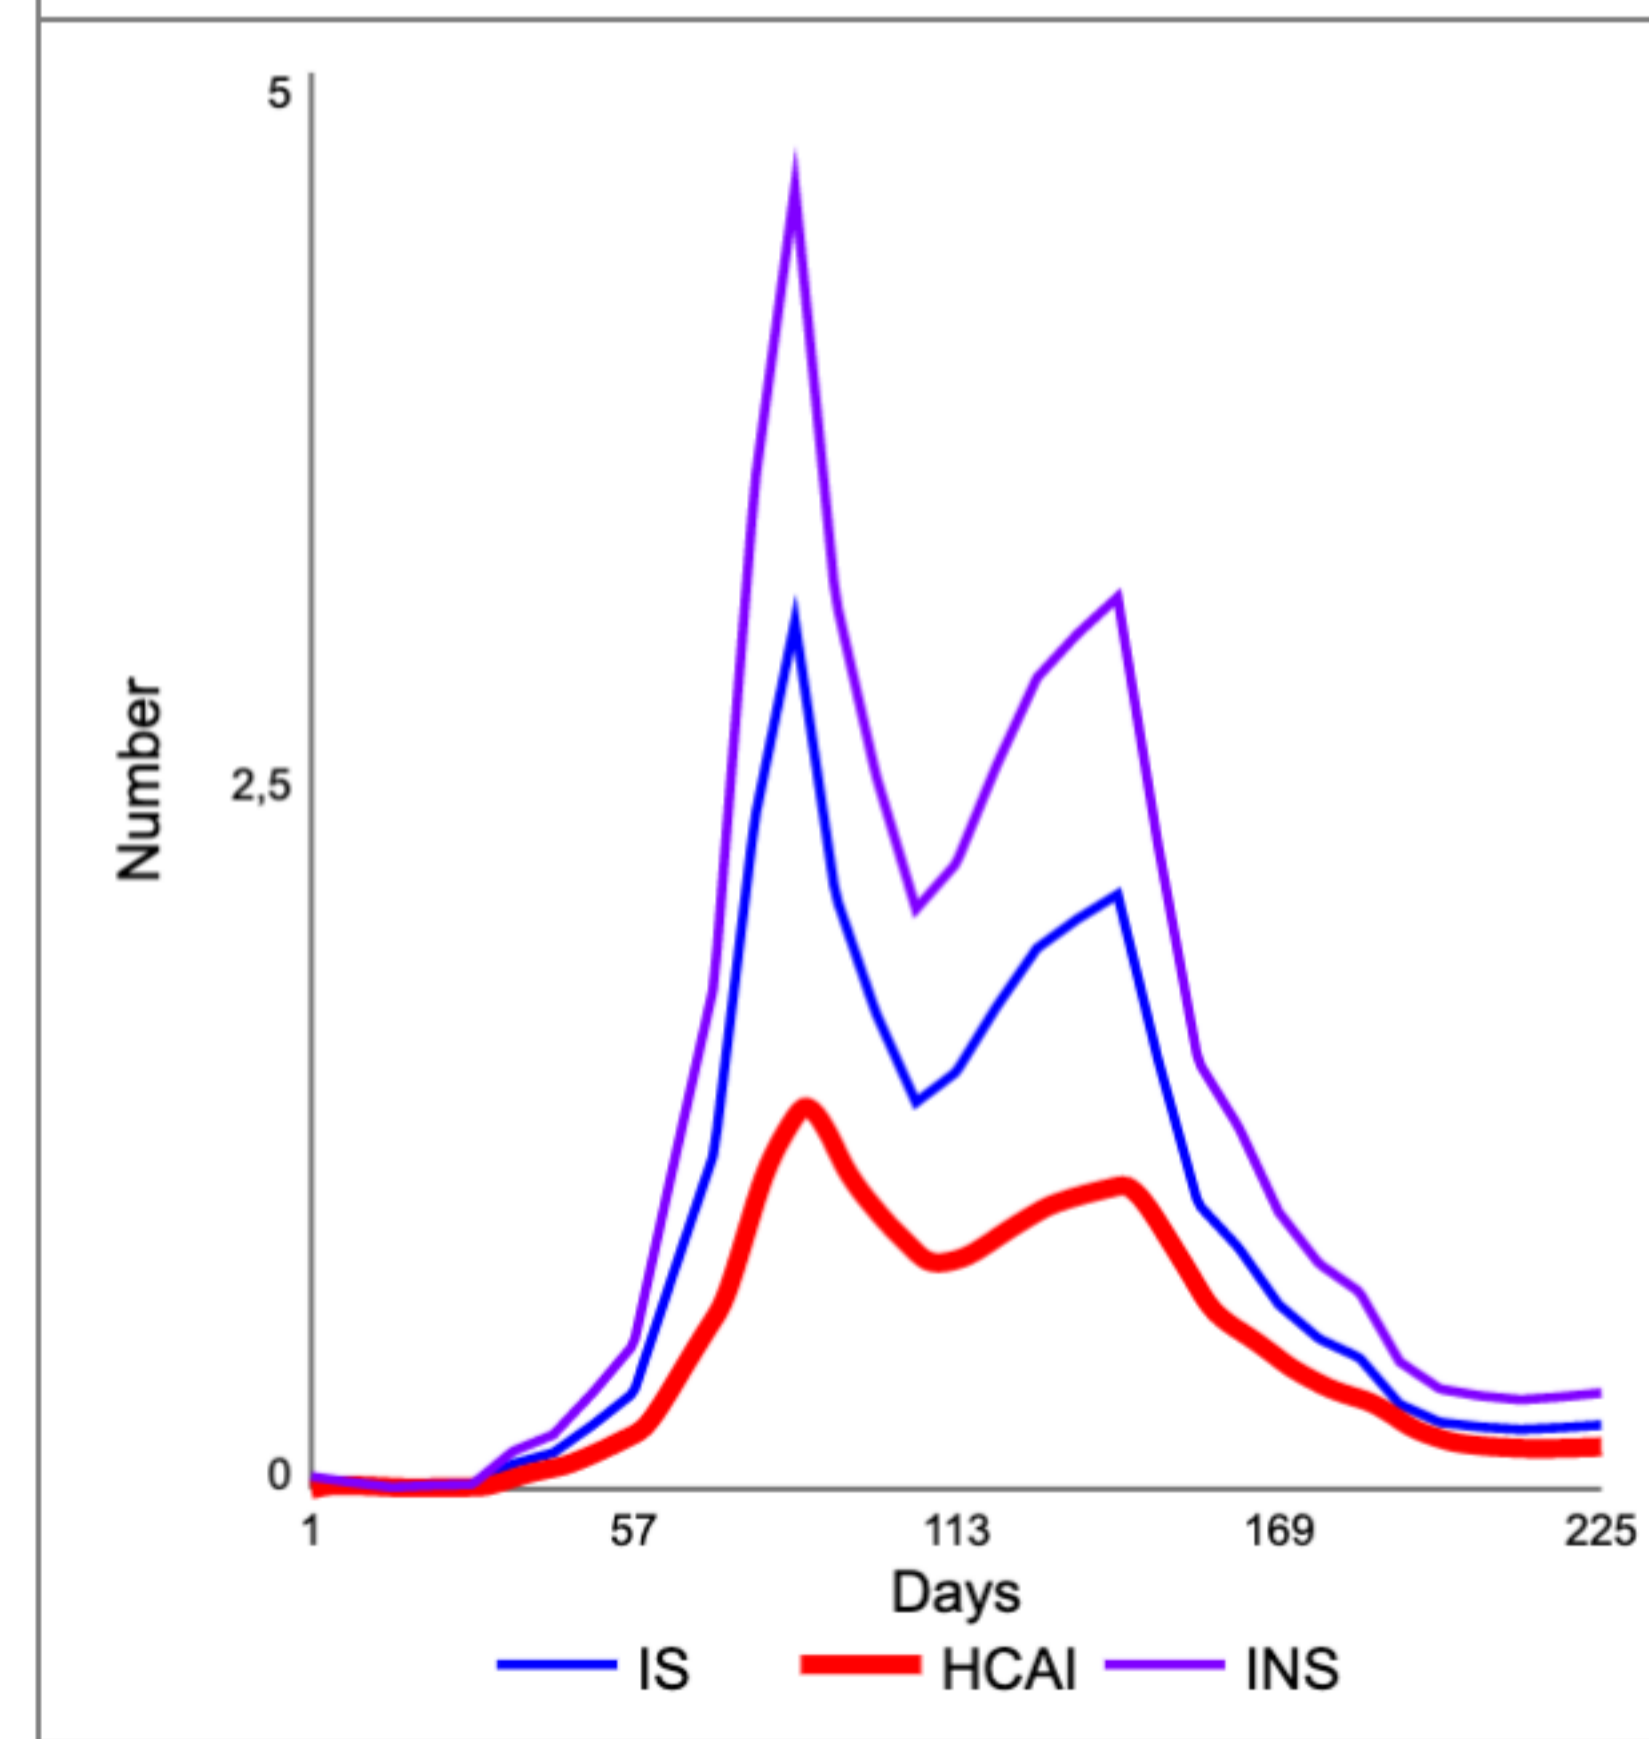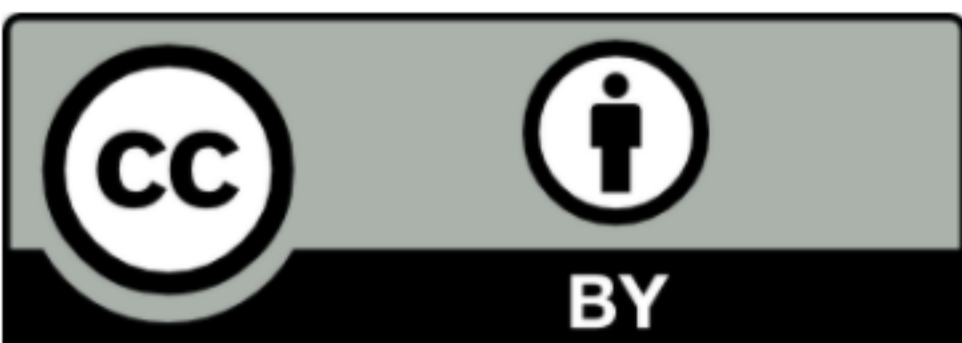

This model is a companion to the paper  
 System dynamic modelling of healthcare-associated  
 influenza - a tool for infection control  
 by  
 M. Sansone, P. Holmström, S. Hallberg, R. Nordén, L-M  
 Andersson, J. Westin
