# Supplementary material for: System dynamic modelling of healthcare associated influenza -a tool for infection control
Source: BMC Health Serv Res. 2022 May 27;22:709. doi: 10.1186/s12913-022-07959-7 (PMC9136787; doi:10.1186/s12913-022-07959-7)
Supplement: Supplementary file 3 — Additional file 3. xmile version of the model. [file 12913_2022_7959_MOESM3_ESM.xmile]

<?xml version="1.0" encoding="utf-8"?>
<xmile version="1.0" xmlns="http://docs.oasis-open.org/xmile/ns/XMILE/v1.0" xmlns:isee="http://iseesystems.com/XMILE">
	<header>
		<smile version="1.0" namespace="std, isee" uses_conveyor=""/>
		<name>HCAI model 220408</name>
		<uuid>bde4b03b-fe49-4caf-8014-3dd49f37efe5</uuid>
		<vendor>isee systems, inc.</vendor>
		<product version="2.1.5" isee:build_number="2537" isee:saved_by_v1="true" lang="en">Stella Architect</product>
	</header>
	<sim_specs isee:sim_duration="1.49333408" isee:simulation_delay="0.00666667" isee:restore_on_start="false" method="Euler" time_units="Days" isee:instantaneous_flows="true" isee:loop_scores="false" isee:loop_exhaustive_allowed="1000">
		<start>1</start>
		<stop>225</stop>
		<dt reciprocal="true">4</dt>
	</sim_specs>
	<isee:prefs show_module_prefix="true" live_update_on_drag="true" show_restore_buttons="false" layer="model" interface_scale_ui="true" interface_max_page_width="10000" interface_max_page_height="10000" interface_min_page_width="0" interface_min_page_height="0" rerun_on_structure_change="false" saved_runs="5" keep="false" rifp="true"/>
	<isee:multiplayer_settings include_chat="true" allow_observers="false" advance_time_increment="1" max_advance_time_in_ms="0" observer_start_page="home_page" enabled="false"/>
	<isee:time_formats default_format="Builtin">
		<isee:time_format name="Builtin" type="adaptive"/>
	</isee:time_formats>
	<default_format/>
	<data>
		<import frequency="on_demand" isee:overwrite="true" resource="/Users/paulholmstrom/Documents/Arbetsdokument/Kunder/Sahlgrenska/Infektion/Modeller steg 5 maj 2018/Historiska influensadata 180919.xlsx" type="Excel" worksheet="Sheet2"/>
	</data>
	<model_units/>
	<model>
		<isee:extra_collection_variables>
			<isee:extra_collection_variable name='"Viral_titre_level_day_2_(treated)"'/>
			<isee:extra_collection_variable name="IS"/>
			<isee:extra_collection_variable name="Accumulated_HCAI_infected_by_Influenza_suspected"/>
			<isee:extra_collection_variable name="HCAI"/>
			<isee:extra_collection_variable name="Accumulated_HCAI_infected_by_Influenza_not_suspected"/>
			<isee:extra_collection_variable name="INS"/>
			<isee:extra_collection_variable name='"Viral_titre_level_day_7_(treated)"'/>
			<isee:extra_collection_variable name='"Season_13--14"'/>
			<isee:extra_collection_variable name='"Season_14--15"'/>
			<isee:extra_collection_variable name='"Viral_titre_level_day_7_(untreated)"'/>
			<isee:extra_collection_variable name='"Season_16--17"'/>
			<isee:extra_collection_variable name='"Season_15--16"'/>
			<isee:extra_collection_variable name='"Season_17--18"'/>
			<isee:extra_collection_variable name="Accumulated_HCAI_infected_by_HCAI"/>
			<isee:extra_collection_variable name='"Viral_titre_level_day_5_(treated)"'/>
			<isee:extra_collection_variable name='"Viral_titre_level_day_1_(untreated)"'/>
			<isee:extra_collection_variable name='"Viral_titre_level_day_2_(untreated)"'/>
			<isee:extra_collection_variable name='"Season_18--19"'/>
			<isee:extra_collection_variable name='"Viral_titre_level_day_8_(treated)"'/>
			<isee:extra_collection_variable name='"Viral_titre_level_day_3_(untreated)"'/>
			<isee:extra_collection_variable name='"Viral_titre_level_day_6_(untreated)"'/>
			<isee:extra_collection_variable name='"Viral_titre_level_day_1_(treated)"'/>
			<isee:extra_collection_variable name='"Viral_titre_level_day_4_(untreated)"'/>
			<isee:extra_collection_variable name='"Viral_titre_level_day_6_(treated)"'/>
			<isee:extra_collection_variable name='"Viral_titre_level_day_5_(untreated)"'/>
			<isee:extra_collection_variable name='"Viral_titre_level_day_3_(treated)"'/>
			<isee:extra_collection_variable name='"Viral_titre_level_day_8_(untreated)"'/>
			<isee:extra_collection_variable name='"Average_viral_titre_level_treated_day_1-8_(should_be_1,00)"'/>
			<isee:extra_collection_variable name='"Viral_titre_level_day_4_(treated)"'/>
		</isee:extra_collection_variables>
		<variables>
			<stock name="Not influenza">
				<eqn>135</eqn>
				<inflow>From_Emergency_not_influenza</inflow>
				<outflow>Not_influensa_leaving</outflow>
				<outflow>HCAI</outflow>
				<non_negative/>
			</stock>
			<flow name="From Emergency not influenza">
				<eqn>Total_ED_arrivals_per_year/365
-IS-INS</eqn>
				<non_negative/>
			</flow>
			<flow name="Not influensa leaving">
				<eqn>Not_influenza/&quot;Care_time,_not_influenza&quot;</eqn>
				<non_negative/>
			</flow>
			<aux name="Care time, not influenza">
				<eqn>5</eqn>
			</aux>
			<flow name="IS">
				<eqn>(&quot;Diagnostic_accuracy_at_Emergency_(%)&quot;/100)*Influenza_season*
&quot;Total_#_influenza_patients_from_Emergency&quot;</eqn>
				<non_negative/>
			</flow>
			<aux name="Average # other exposed\npatients in shared rooms">
				<eqn>2</eqn>
			</aux>
			<flow name="HCAI">
				<eqn>Not_influenza
*
Calibration_factor/10*


((1-&quot;Ratio_non-flu_receiving_prophylactic_medication_(%)&quot;/100)
+
(&quot;Ratio_non-flu_receiving_prophylactic_medication_(%)&quot;/100)

*(1-&quot;Prophylactic_effectiveness_(%)&quot;/100))


*
&quot;Average_#_other_exposed_patients_in_shared_rooms&quot;

*
(
(1-&quot;Vaccination_coverage_(%)&quot;/100)+
((&quot;Vaccination_coverage_(%)&quot;/100)*(1-&quot;Vaccine_effectiveness_(%)&quot;/100))
)
*

(
(HCAI_Relative_Infectivity+
IS_Relative_Infectivity+
INS_Relative_infectivity)
/

(HCAI_Relative_Infectivity+IS_Relative_Infectivity+INS_Relative_infectivity+

Not_influenza)
)</eqn>
				<non_negative/>
			</flow>
			<aux name="Calibration factor">
				<eqn>.001</eqn>
			</aux>
			<aux name="Total ED arrivals per year">
				<eqn>15000</eqn>
			</aux>
			<stock name="Accumulated Hospital-associated\ninfluenza (HCAI)">
				<eqn>0</eqn>
				<inflow>Infected_HCAI</inflow>
				<non_negative/>
			</stock>
			<flow name="Infected HCAI">
				<eqn>HCAI</eqn>
				<non_negative/>
			</flow>
			<aux name="Season free">
				<eqn>TIME</eqn>
				<gf>
					<xscale min="1" max="225"/>
					<yscale min="0" max="2"/>
					<ypts>0.011261895376992,0.0104574742786354,0.00965305318027881,0.00884863208192224,0.00804421098356568,0.00723978988520911,0.00643536878685254,0.00563094768849597,0.00563094768849597,0.00563094768849597,0.00563094768849597,0.00563094768849597,0.00563094768849597,0.00563094768849597,0.00563094768849597,0.00643536878685254,0.00723978988520911,0.00804421098356568,0.00884863208192224,0.00965305318027881,0.0104574742786354,0.011261895376992,0.0144795797704182,0.0176972641638445,0.0209149485572708,0.024132632950697,0.0273503173441233,0.0305680017375496,0.0337856861309758,0.0329812650326193,0.0321768439342627,0.0313724228359061,0.0305680017375496,0.029763580639193,0.0289591595408364,0.0281547384424799,0.0313724228359061,0.0345901072293324,0.0378077916227587,0.041025476016185,0.0442431604096112,0.0474608448030375,0.0506785291964638,0.0458520026063244,0.041025476016185,0.0361989494260456,0.0313724228359062,0.0265458962457668,0.0217193696556273,0.0168928430654879,0.0193061063605576,0.0217193696556273,0.024132632950697,0.0265458962457667,0.0289591595408364,0.0313724228359061,0.0337856861309758,0.0402210549178284,0.0466564237046809,0.0530917924915335,0.059527161278386,0.0659625300652385,0.0723978988520911,0.0788332676389436,0.0868774786225093,0.094921689606075,0.102965900589641,0.111010111573206,0.119054322556772,0.127098533540338,0.135142744523903,0.177777062736801,0.2204113809497,0.263045699162598,0.305680017375496,0.348314335588394,0.390948653801292,0.43358297201419,0.440018340801043,0.446453709587895,0.452889078374748,0.4593244471616,0.465759815948453,0.472195184735305,0.478630553522158,0.483457080112297,0.488283606702437,0.493110133292576,0.497936659882716,0.502763186472855,0.507589713062994,0.512416239653134,0.516438345144917,0.520460450636699,0.524482556128482,0.528504661620265,0.532526767112048,0.536548872603831,0.540570978095614,0.51804718734163,0.495523396587646,0.472999605833662,0.450475815079678,0.427952024325694,0.40542823357171,0.382904442817726,0.402210549178284,0.421516655538842,0.440822761899399,0.460128868259957,0.479434974620514,0.498741080981072,0.51804718734163,0.551028452374249,0.584009717406868,0.616990982439488,0.649972247472107,0.682953512504726,0.715934777537346,0.748916042569965,0.820509520323699,0.892102998077434,0.963696475831168,1.0352899535849,1.10688343133864,1.17847690909237,1.25007038684611,1.28868259956722,1.32729481228834,1.36590702500945,1.40451923773057,1.44313145045168,1.4817436631728,1.52035587589391,1.55172829872982,1.58310072156573,1.61447314440163,1.64584556723754,1.67721799007344,1.70859041290935,1.73996283574526,1.6780224111718,1.61608198659834,1.55414156202489,1.49220113745143,1.43026071287798,1.36832028830452,1.30637986373107,1.2742030197968,1.24202617586254,1.20984933192828,1.17767248799402,1.14549564405975,1.11331880012549,1.08114195619123,1.04735627006025,1.01357058392928,0.979784897798299,0.945999211667324,0.912213525536348,0.878427839405372,0.844642153274396,0.80844320384835,0.772244254422305,0.736045304996259,0.699846355570214,0.663647406144168,0.627448456718123,0.591249507292077,0.575965506423303,0.560681505554528,0.545397504685753,0.530113503816978,0.514829502948203,0.499545502079428,0.484261501210654,0.471390763636949,0.458520026063244,0.445649288489538,0.432778550915833,0.419907813342128,0.407037075768423,0.394166338194718,0.398992864784858,0.403819391374997,0.408645917965136,0.413472444555276,0.418298971145415,0.423125497735555,0.427952024325694,0.403819391374997,0.3796867584243,0.355554125473603,0.331421492522906,0.307288859572209,0.283156226621512,0.259023593670815,0.259023593670815,0.259023593670815,0.259023593670815,0.259023593670815,0.259023593670815,0.259023593670815,0.259023593670815,0.236499802916831,0.213976012162847,0.191452221408863,0.168928430654879,0.146404639900895,0.123880849146912,0.101357058392928,0.0868774786225093,0.0723978988520911,0.0579183190816729,0.0434387393112547,0.0289591595408364,0.0144795797704182,0,0,0,0,0,0,0,0</ypts>
				</gf>
			</aux>
			<aux name="Season 16--17">
				<eqn>TIME</eqn>
				<gf>
					<xscale min="1" max="225"/>
					<yscale min="0" max="2"/>
					<ypts>0.0148630880923798,0.013883104262113,0.0129031204318462,0.0119231366015794,0.0109431527713126,0.0099631689410458,0.008983185110779,0.00800320128051221,0.00718654808862321,0.0063698948967342,0.0055532417048452,0.0047365885129562,0.0039199353210672,0.0031032821291782,0.0022866289372892,0.0026132902140448,0.0029399514908004,0.003266612767556,0.0035932740443116,0.0039199353210672,0.0042465965978228,0.0045732578745784,0.0047365885129562,0.004899919151334,0.0050632497897118,0.0052265804280896,0.0053899110664674,0.0055532417048452,0.005716572343223,0.0112698140480682,0.0168230557529134,0.0223762974577586,0.0279295391626038,0.033482780867449,0.0390360225722942,0.0445892642771394,0.047365885129562,0.0501425059819846,0.0529191268344072,0.0556957476868298,0.0584723685392524,0.061248989391675,0.0640256102440976,0.0712121583327209,0.0783987064213441,0.0855852545099673,0.0927718025985904,0.0999583506872136,0.107144898775837,0.11433144686446,0.122334648144972,0.130337849425485,0.138341050705997,0.146344251986509,0.154347453267021,0.162350654547533,0.170353855828046,0.200896685204694,0.231439514581343,0.261982343957991,0.29252517333464,0.323068002711289,0.353610832087937,0.384153661464586,0.414206498926101,0.444259336387616,0.474312173849132,0.504365011310647,0.534417848772162,0.564470686233677,0.594523523695193,0.678312141183004,0.762100758670815,0.845889376158627,0.929677993646438,1.01346661113425,1.09725522862206,1.18104384610987,1.23102302145348,1.28100219679709,1.33098137214069,1.3809605474843,1.43093972282791,1.48091889817151,1.53089807351512,1.46213587475807,1.39337367600101,1.32461147724396,1.25584927848691,1.18708707972985,1.1183248809728,1.04956268221574,1.01983650603098,0.990110329846224,0.960384153661465,0.930657977476705,0.900931801291945,0.871205625107186,0.841479448922426,0.818776490187912,0.796073531453398,0.773370572718884,0.750667613984369,0.727964655249855,0.705261696515341,0.682558737780827,0.690235277784583,0.69791181778834,0.705588357792097,0.713264897795853,0.72094143779961,0.728617977803367,0.736294517807123,0.752790912283281,0.769287306759439,0.785783701235596,0.802280095711754,0.818776490187912,0.83527288466407,0.851769279140228,0.86646903659423,0.881168794048232,0.895868551502233,0.910568308956235,0.925268066410237,0.939967823864239,0.954667581318242,0.962017460045243,0.969367338772244,0.976717217499245,0.984067096226246,0.991416974953247,0.998766853680248,1.00611673240725,1.01232329666561,1.01852986092396,1.02473642518232,1.03094298944067,1.03714955369903,1.04335611795739,1.04956268221574,1.00807670006778,0.966590717919821,0.92510473577186,0.883618753623899,0.842132771475938,0.800646789327976,0.759160807180015,0.722574744183388,0.68598868118676,0.649402618190133,0.612816555193506,0.576230492196879,0.539644429200251,0.503058366203624,0.492115213432312,0.481172060660999,0.470228907889687,0.459285755118374,0.448342602347061,0.437399449575749,0.426456296804436,0.41208320062719,0.397710104449943,0.383337008272697,0.368963912095451,0.354590815918204,0.340217719740958,0.325844623563711,0.317188099729688,0.308531575895664,0.299875052061641,0.291218528227618,0.282562004393594,0.273905480559571,0.265248956725547,0.260512368212591,0.255775779699635,0.251039191186679,0.246302602673723,0.241566014160766,0.23682942564781,0.232092837134854,0.220333031171652,0.208573225208451,0.196813419245249,0.185053613282048,0.173293807318846,0.161534001355644,0.149774195392443,0.145200937517864,0.140627679643286,0.136054421768708,0.131481163894129,0.126907906019551,0.122334648144972,0.117761390270394,0.116618075801749,0.115474761333105,0.11433144686446,0.113188132395816,0.112044817927171,0.110901503458526,0.109758188989882,0.109104866436371,0.108451543882859,0.107798221329348,0.107144898775837,0.106491576222326,0.105838253668815,0.105184931115303,0.105674923030437,0.10616491494557,0.106654906860704,0.107144898775837,0.10763489069097,0.108124882606104,0.108614874521237,0.109268197074748,0.10992151962826,0.110574842181771,0.111228164735282,0.111881487288793,0.112534809842304,0.113188132395816</ypts>
				</gf>
			</aux>
			<aux name="Season 15--16">
				<eqn>TIME</eqn>
				<gf>
					<xscale min="1" max="225"/>
					<yscale min="0" max="1"/>
					<ypts>0.00165152766308836,0.0025952577562817,0.00353898784947505,0.0044827179426684,0.00542644803586174,0.00637017812905509,0.00731390822224844,0.00825763831544178,0.00731390822224844,0.00637017812905509,0.00542644803586174,0.0044827179426684,0.00353898784947505,0.0025952577562817,0.00165152766308836,0.00165152766308836,0.00165152766308836,0.00165152766308836,0.00165152766308836,0.00165152766308836,0.00165152766308836,0.00165152766308836,0.00235932523298337,0.00306712280287838,0.00377492037277339,0.0044827179426684,0.00519051551256341,0.00589831308245842,0.00660611065235343,0.00754984074554677,0.00849357083874012,0.00943730093193347,0.0103810310251268,0.0113247611183202,0.0122684912115135,0.0132122213047069,0.0155715465376902,0.0179308717706736,0.020290197003657,0.0226495222366403,0.0250088474696237,0.0273681727026071,0.0297274979355904,0.0349180134481538,0.0401085289607172,0.0452990444732806,0.050489559985844,0.0556800754984074,0.0608705910109709,0.0660611065235343,0.0644095788604459,0.0627580511973576,0.0611065235342692,0.0594549958711809,0.0578034682080925,0.0561519405450041,0.0545004128819158,0.0670048366167276,0.0795092603515395,0.0920136840863513,0.104518107821163,0.117022531555975,0.129526955290787,0.142031379025599,0.148637489677952,0.155243600330306,0.161849710982659,0.168455821635012,0.175061932287366,0.181668042939719,0.188274153592073,0.204081632653061,0.21988911171405,0.235696590775038,0.251504069836027,0.267311548897016,0.283119027958004,0.298926507018993,0.305768550194644,0.312610593370296,0.319452636545948,0.3262946797216,0.333136722897251,0.339978766072903,0.346820809248555,0.360033030553262,0.373245251857969,0.386457473162675,0.399669694467382,0.412881915772089,0.426094137076796,0.439306358381503,0.437654830718415,0.436003303055326,0.434351775392238,0.432700247729149,0.431048720066061,0.429397192402973,0.427745664739884,0.424678541937006,0.421611419134128,0.418544296331249,0.415477173528371,0.412410050725493,0.409342927922614,0.406275805119736,0.44544060398726,0.484605402854784,0.523770201722307,0.562935000589831,0.602099799457355,0.641264598324879,0.680429397192403,0.752624749321694,0.824820101450985,0.897015453580276,0.969210805709567,1.04140615783886,1.11360150996815,1.18579686209744,1.22732098619795,1.26884511029845,1.31036923439896,1.35189335849947,1.39341748259998,1.43494160670048,1.47646573080099,1.48590303173292,1.49534033266486,1.50477763359679,1.51421493452873,1.52365223546066,1.53308953639259,1.54252683732453,1.51138374424915,1.48024065117376,1.44909755809838,1.417954465023,1.38681137194762,1.35566827887224,1.32452518579686,1.29361802524478,1.2627108646927,1.23180370414062,1.20089654358853,1.16998938303645,1.13908222248437,1.10817506193229,1.08552553969565,1.06287601745901,1.04022649522237,1.01757697298573,0.994927450749086,0.972277928512445,0.949628406275805,0.927450749085762,0.905273091895718,0.883095434705674,0.860917777515631,0.838740120325587,0.816562463135544,0.7943848059455,0.779756989501003,0.765129173056506,0.750501356612009,0.735873540167512,0.721245723723015,0.706617907278519,0.691990090834022,0.685619912704967,0.679249734575911,0.672879556446856,0.666509378317801,0.660139200188746,0.653769022059691,0.647398843930636,0.632299162439542,0.617199480948449,0.602099799457355,0.587000117966262,0.571900436475168,0.556800754984074,0.541701073492981,0.515512563406866,0.48932405332075,0.463135543234635,0.43694703314852,0.410758523062404,0.384570012976289,0.358381502890174,0.338091305886517,0.31780110888286,0.297510911879203,0.277220714875546,0.256930517871889,0.236640320868232,0.216350123864575,0.20573316031615,0.195116196767724,0.184499233219299,0.173882269670874,0.163265306122449,0.152648342574024,0.142031379025599,0.135661200896544,0.129291022767489,0.122920844638433,0.116550666509378,0.110180488380323,0.103810310251268,0.0974401321222131,0.0972041995989147,0.0969682670756164,0.096732334552318,0.0964964020290197,0.0962604695057213,0.096024536982423,0.0957886044591247,0.0821045181078212,0.0684204317565176,0.0547363454052141,0.0410522590539106,0.0273681727026071,0.0136840863513035,0</ypts>
				</gf>
			</aux>
			<aux name="Season 14--15">
				<eqn>TIME</eqn>
				<gf>
					<xscale min="1" max="225"/>
					<yscale min="0" max="2"/>
					<ypts>0,0.000238859588779332,0.000477719177558664,0.000716578766337996,0.000955438355117328,0.00119429794389666,0.00143315753267599,0.00167201712145532,0.00167201712145532,0.00167201712145532,0.00167201712145532,0.00167201712145532,0.00167201712145532,0.00167201712145532,0.00167201712145532,0.00214973629901399,0.00262745547657265,0.00310517465413132,0.00358289383168998,0.00406061300924864,0.00453833218680731,0.00501605136436597,0.0052549109531453,0.00549377054192464,0.00573263013070397,0.0059714897194833,0.00621034930826263,0.00644920889704196,0.0066880684858213,0.00716578766337996,0.00764350684093862,0.00812122601849729,0.00859894519605595,0.00907666437361461,0.00955438355117328,0.0100321027287319,0.0100321027287319,0.0100321027287319,0.0100321027287319,0.0100321027287319,0.0100321027287319,0.0100321027287319,0.0100321027287319,0.00955438355117328,0.00907666437361462,0.00859894519605595,0.00812122601849729,0.00764350684093863,0.00716578766337996,0.0066880684858213,0.00788236642971796,0.00907666437361462,0.0102709623175113,0.0114652602614079,0.0126595582053046,0.0138538561492013,0.0150481540930979,0.0148092945043186,0.0145704349155393,0.0143315753267599,0.0140927157379806,0.0138538561492013,0.0136149965604219,0.0133761369716426,0.0140927157379806,0.0148092945043186,0.0155258732706566,0.0162424520369946,0.0169590308033326,0.0176756095696706,0.0183921883360086,0.0234082397003745,0.0284242910647405,0.0334403424291065,0.0384563937934725,0.0434724451578384,0.0484884965222044,0.0535045478865704,0.0563708629519224,0.0592371780172743,0.0621034930826263,0.0649698081479783,0.0678361232133303,0.0707024382786823,0.0735687533440343,0.0752407704654896,0.0769127875869449,0.0785848047084002,0.0802568218298555,0.0819288389513109,0.0836008560727662,0.0852728731942215,0.103187342352671,0.121101811511121,0.139016280669571,0.156930749828021,0.174845218986471,0.192759688144921,0.210674157303371,0.225722311396469,0.240770465489567,0.255818619582665,0.270866773675763,0.28591492776886,0.300963081861958,0.316011235955056,0.322938164029657,0.329865092104258,0.336792020178858,0.343718948253459,0.350645876328059,0.35757280440266,0.364499732477261,0.386952533822518,0.409405335167775,0.431858136513032,0.454310937858289,0.476763739203547,0.499216540548804,0.521669341894061,0.574935030191852,0.628200718489643,0.681466406787434,0.734732095085225,0.787997783383016,0.841263471680807,0.894529159978598,0.964276159902163,1.03402315982573,1.10377015974929,1.17351715967286,1.24326415959642,1.31301115951999,1.38275815944355,1.41166016968585,1.44056217992815,1.46946419017045,1.49836620041275,1.52726821065505,1.55617022089735,1.58507223113965,1.5728903921119,1.56070855308416,1.54852671405641,1.53634487502866,1.52416303600092,1.51198119697317,1.49979935794543,1.49191699151571,1.48403462508599,1.47615225865627,1.46826989222655,1.46038752579684,1.45250515936712,1.4446227929374,1.41070473133074,1.37678666972407,1.34286860811741,1.30895054651074,1.27503248490407,1.24111442329741,1.20719636169074,1.16037988229,1.11356340288925,1.0667469234885,1.01993044408775,0.973113964686998,0.926297485286249,0.8794810058855,0.88306389971719,0.88664679354888,0.89022968738057,0.89381258121226,0.89739547504395,0.90097836887564,0.90456126270733,0.882347320950852,0.860133379194375,0.837919437437897,0.815705495681419,0.793491553924941,0.771277612168463,0.749063670411985,0.761962088206069,0.774860506000153,0.787758923794237,0.800657341588321,0.813555759382404,0.826454177176488,0.839352594970573,0.792774975158603,0.746197355346633,0.699619735534663,0.653042115722694,0.606464495910724,0.559886876098754,0.513309256286784,0.503516013146832,0.493722770006879,0.483929526866927,0.474136283726974,0.464343040587021,0.454549797447069,0.444756554307116,0.413704807765803,0.38265306122449,0.351601314683177,0.320549568141863,0.28949782160055,0.258446075059237,0.227394328517924,0.194909424443935,0.162424520369946,0.129939616295957,0.0974547122219674,0.0649698081479783,0.0324849040739891,0,0,0,0,0,0,0,0</ypts>
				</gf>
			</aux>
			<aux name="Season 13--14">
				<eqn>TIME</eqn>
				<gf>
					<xscale min="1" max="225"/>
					<yscale min="0" max="2"/>
					<ypts>0.011261895376992,0.0104574742786354,0.00965305318027881,0.00884863208192224,0.00804421098356568,0.00723978988520911,0.00643536878685254,0.00563094768849597,0.00563094768849597,0.00563094768849597,0.00563094768849597,0.00563094768849597,0.00563094768849597,0.00563094768849597,0.00563094768849597,0.00643536878685254,0.00723978988520911,0.00804421098356568,0.00884863208192224,0.00965305318027881,0.0104574742786354,0.011261895376992,0.0144795797704182,0.0176972641638445,0.0209149485572708,0.024132632950697,0.0273503173441233,0.0305680017375496,0.0337856861309758,0.0329812650326193,0.0321768439342627,0.0313724228359061,0.0305680017375496,0.029763580639193,0.0289591595408364,0.0281547384424799,0.0313724228359061,0.0345901072293324,0.0378077916227587,0.041025476016185,0.0442431604096112,0.0474608448030375,0.0506785291964638,0.0458520026063244,0.041025476016185,0.0361989494260456,0.0313724228359062,0.0265458962457668,0.0217193696556273,0.0168928430654879,0.0193061063605576,0.0217193696556273,0.024132632950697,0.0265458962457667,0.0289591595408364,0.0313724228359061,0.0337856861309758,0.0402210549178284,0.0466564237046809,0.0530917924915335,0.059527161278386,0.0659625300652385,0.0723978988520911,0.0788332676389436,0.0868774786225093,0.094921689606075,0.102965900589641,0.111010111573206,0.119054322556772,0.127098533540338,0.135142744523903,0.177777062736801,0.2204113809497,0.263045699162598,0.305680017375496,0.348314335588394,0.390948653801292,0.43358297201419,0.440018340801043,0.446453709587895,0.452889078374748,0.4593244471616,0.465759815948453,0.472195184735305,0.478630553522158,0.483457080112297,0.488283606702437,0.493110133292576,0.497936659882716,0.502763186472855,0.507589713062994,0.512416239653134,0.516438345144917,0.520460450636699,0.524482556128482,0.528504661620265,0.532526767112048,0.536548872603831,0.540570978095614,0.51804718734163,0.495523396587646,0.472999605833662,0.450475815079678,0.427952024325694,0.40542823357171,0.382904442817726,0.402210549178284,0.421516655538842,0.440822761899399,0.460128868259957,0.479434974620514,0.498741080981072,0.51804718734163,0.551028452374249,0.584009717406868,0.616990982439488,0.649972247472107,0.682953512504726,0.715934777537346,0.748916042569965,0.820509520323699,0.892102998077434,0.963696475831168,1.0352899535849,1.10688343133864,1.17847690909237,1.25007038684611,1.28868259956722,1.32729481228834,1.36590702500945,1.40451923773057,1.44313145045168,1.4817436631728,1.52035587589391,1.55172829872982,1.58310072156573,1.61447314440163,1.64584556723754,1.67721799007344,1.70859041290935,1.73996283574526,1.6780224111718,1.61608198659834,1.55414156202489,1.49220113745143,1.43026071287798,1.36832028830452,1.30637986373107,1.2742030197968,1.24202617586254,1.20984933192828,1.17767248799402,1.14549564405975,1.11331880012549,1.08114195619123,1.04735627006025,1.01357058392928,0.979784897798299,0.945999211667324,0.912213525536348,0.878427839405372,0.844642153274396,0.80844320384835,0.772244254422305,0.736045304996259,0.699846355570214,0.663647406144168,0.627448456718123,0.591249507292077,0.575965506423303,0.560681505554528,0.545397504685753,0.530113503816978,0.514829502948203,0.499545502079428,0.484261501210654,0.471390763636949,0.458520026063244,0.445649288489538,0.432778550915833,0.419907813342128,0.407037075768423,0.394166338194718,0.398992864784858,0.403819391374997,0.408645917965136,0.413472444555276,0.418298971145415,0.423125497735555,0.427952024325694,0.403819391374997,0.3796867584243,0.355554125473603,0.331421492522906,0.307288859572209,0.283156226621512,0.259023593670815,0.259023593670815,0.259023593670815,0.259023593670815,0.259023593670815,0.259023593670815,0.259023593670815,0.259023593670815,0.236499802916831,0.213976012162847,0.191452221408863,0.168928430654879,0.146404639900895,0.123880849146912,0.101357058392928,0.0868774786225093,0.0723978988520911,0.0579183190816729,0.0434387393112547,0.0289591595408364,0.0144795797704182,0,0,0,0,0,0,0,0</ypts>
				</gf>
			</aux>
			<aux name="Total # influenza\npatients from Emergency">
				<eqn>500</eqn>
			</aux>
			<aux name="Vaccination coverage (%)">
				<eqn>50</eqn>
			</aux>
			<aux name="Vaccine effectiveness (%)">
				<eqn>75</eqn>
			</aux>
			<aux name="HCAI Infectvity Day 1">
				<eqn>(((&quot;Share_of_HCAI_treated_day_2_(%)&quot;/100)*&quot;Viral_titre_level_day_1_(treated)&quot;)+
((1-(&quot;Share_of_HCAI_treated_day_2_(%)&quot;
/100))*&quot;Viral_titre_level_day_1_(untreated)&quot;))</eqn>
			</aux>
			<aux name="HCAI Infectvity Day 2">
				<eqn>(((&quot;Share_of_HCAI_treated_day_2_(%)&quot;/100)*&quot;Viral_titre_level_day_2_(treated)&quot;)+
((1-(&quot;Share_of_HCAI_treated_day_2_(%)&quot;
/100))*&quot;Viral_titre_level_day_2_(untreated)&quot;))</eqn>
			</aux>
			<aux name="HCAI Infectvity Day 3">
				<eqn>(((&quot;Share_of_HCAI_treated_day_2_(%)&quot;/100)*&quot;Viral_titre_level_day_3_(treated)&quot;)+
((1-(&quot;Share_of_HCAI_treated_day_2_(%)&quot;
/100))*&quot;Viral_titre_level_day_3_(untreated)&quot;))</eqn>
			</aux>
			<aux name="HCAI Infectvity Day 4">
				<eqn>(((&quot;Share_of_HCAI_treated_day_2_(%)&quot;/100)*&quot;Viral_titre_level_day_4_(treated)&quot;)+
((1-(&quot;Share_of_HCAI_treated_day_2_(%)&quot;
/100))*&quot;Viral_titre_level_day_4_(untreated)&quot;))</eqn>
			</aux>
			<aux name="HCAI Infectvity Day 5">
				<eqn>(((&quot;Share_of_HCAI_treated_day_2_(%)&quot;/100)*&quot;Viral_titre_level_day_5_(treated)&quot;)+
((1-(&quot;Share_of_HCAI_treated_day_2_(%)&quot;
/100))*&quot;Viral_titre_level_day_5_(untreated)&quot;))</eqn>
			</aux>
			<aux name="HCAI Infectvity Day 6">
				<eqn>(((&quot;Share_of_HCAI_treated_day_2_(%)&quot;/100)*&quot;Viral_titre_level_day_6_(treated)&quot;)+
((1-(&quot;Share_of_HCAI_treated_day_2_(%)&quot;
/100))*&quot;Viral_titre_level_day_6_(untreated)&quot;))</eqn>
			</aux>
			<aux name="HCAI Infectvity Day 7">
				<eqn>(((&quot;Share_of_HCAI_treated_day_2_(%)&quot;/100)*&quot;Viral_titre_level_day_7_(treated)&quot;)+
((1-(&quot;Share_of_HCAI_treated_day_2_(%)&quot;
/100))*&quot;Viral_titre_level_day_7_(untreated)&quot;))</eqn>
			</aux>
			<aux name="HCAI Infectvity Day 8">
				<eqn>(((&quot;Share_of_HCAI_treated_day_2_(%)&quot;/100)*&quot;Viral_titre_level_day_8_(treated)&quot;)+
((1-(&quot;Share_of_HCAI_treated_day_2_(%)&quot;
/100))*&quot;Viral_titre_level_day_8_(untreated)&quot;))</eqn>
			</aux>
			<aux name="HCAI Relative Infectivity">
				<eqn>((HCAI_Day_1*HCAI_Infectvity_Day_1)+(HCAI_Day2*HCAI_Infectvity_Day_2)+(SU_Dag_3*HCAI_Infectvity_Day_3)+(HCAI_Day_4*HCAI_Infectvity_Day_4)+(HCAI_Day_5*HCAI_Infectvity_Day_5)+(HCAI_Day_6*HCAI_Infectvity_Day_6)+(HCAI_Day_7*HCAI_Infectvity_Day_7)+(HCAI_Day_8*HCAI_Infectvity_Day_8))</eqn>
			</aux>
			<stock name="HCAI Day 1">
				<eqn>0</eqn>
				<inflow>HCAI</inflow>
				<outflow>HCAI_Day_1t2</outflow>
				<conveyor discrete="true">
					<len>1</len>
				</conveyor>
			</stock>
			<stock name="HCAI Day2">
				<eqn>0</eqn>
				<inflow>HCAI_Day_1t2</inflow>
				<outflow>HCAI_Day_2t3</outflow>
				<conveyor discrete="true">
					<len>1</len>
				</conveyor>
			</stock>
			<stock name="SU Dag 3">
				<eqn>0</eqn>
				<inflow>HCAI_Day_2t3</inflow>
				<outflow>HCAI_Day_3t4</outflow>
				<conveyor discrete="true">
					<len>1</len>
				</conveyor>
			</stock>
			<stock name="HCAI Day 4">
				<eqn>0</eqn>
				<inflow>HCAI_Day_3t4</inflow>
				<outflow>HCAI_Day_4t5</outflow>
				<conveyor discrete="true">
					<len>1</len>
				</conveyor>
			</stock>
			<stock name="HCAI Day 5">
				<eqn>0</eqn>
				<inflow>HCAI_Day_4t5</inflow>
				<outflow>HCAI_Day_5t6</outflow>
				<conveyor discrete="true">
					<len>1</len>
				</conveyor>
			</stock>
			<stock name="HCAI Day 6">
				<eqn>0</eqn>
				<inflow>HCAI_Day_5t6</inflow>
				<outflow>HCAI_Day_6t7</outflow>
				<conveyor discrete="true">
					<len>1</len>
				</conveyor>
			</stock>
			<stock name="HCAI Day 7">
				<eqn>0</eqn>
				<inflow>HCAI_Day_6t7</inflow>
				<outflow>HCAI_Day_7t8</outflow>
				<conveyor discrete="true">
					<len>1</len>
				</conveyor>
			</stock>
			<stock name="HCAI Day 8">
				<eqn>0</eqn>
				<inflow>HCAI_Day_7t8</inflow>
				<outflow>HCAI_Day_8_out</outflow>
				<conveyor discrete="true">
					<len>1</len>
				</conveyor>
			</stock>
			<flow name="HCAI Day 1t2">
				<eqn>0</eqn>
				<non_negative/>
			</flow>
			<flow name="HCAI Day 2t3">
				<eqn>0</eqn>
				<non_negative/>
			</flow>
			<flow name="HCAI Day 3t4">
				<eqn>0</eqn>
				<non_negative/>
			</flow>
			<flow name="HCAI Day 4t5">
				<eqn>0</eqn>
				<non_negative/>
			</flow>
			<flow name="HCAI Day 5t6">
				<eqn>0</eqn>
				<non_negative/>
			</flow>
			<flow name="HCAI Day 6t7">
				<eqn>0</eqn>
				<non_negative/>
			</flow>
			<flow name="HCAI Day 7t8">
				<eqn>0</eqn>
				<non_negative/>
			</flow>
			<flow name="HCAI Day 8 out">
				<eqn>0</eqn>
				<non_negative/>
			</flow>
			<aux name="Share of HCAI treated day 2 (%)">
				<eqn>60</eqn>
			</aux>
			<aux name="IS Infectivity Day 3">
				<eqn>(((&quot;Share_of_IS_treated_day_2_(%)&quot;/100)*&quot;Viral_titre_level_day_3_(treated)&quot;)+
((1-(&quot;Share_of_IS_treated_day_2_(%)&quot;/100))*&quot;Viral_titre_level_day_3_(untreated)&quot;))</eqn>
			</aux>
			<aux name="IS Infectivity Day 4">
				<eqn>(((&quot;Share_of_IS_treated_day_2_(%)&quot;/100)*&quot;Viral_titre_level_day_4_(treated)&quot;)+
((1-(&quot;Share_of_IS_treated_day_2_(%)&quot;/100))*&quot;Viral_titre_level_day_4_(untreated)&quot;))</eqn>
			</aux>
			<aux name="IS Infectivity Day 5">
				<eqn>(((&quot;Share_of_IS_treated_day_2_(%)&quot;/100)*&quot;Viral_titre_level_day_5_(treated)&quot;)+
((1-(&quot;Share_of_IS_treated_day_2_(%)&quot;/100))*&quot;Viral_titre_level_day_5_(untreated)&quot;))</eqn>
			</aux>
			<aux name="IS Infectivity Day 6">
				<eqn>(((&quot;Share_of_IS_treated_day_2_(%)&quot;/100)*&quot;Viral_titre_level_day_6_(treated)&quot;)+
((1-(&quot;Share_of_IS_treated_day_2_(%)&quot;/100))*&quot;Viral_titre_level_day_6_(untreated)&quot;))</eqn>
			</aux>
			<aux name="IS Infectivity Day 7">
				<eqn>(((&quot;Share_of_IS_treated_day_2_(%)&quot;/100)*&quot;Viral_titre_level_day_7_(treated)&quot;)+
((1-(&quot;Share_of_IS_treated_day_2_(%)&quot;/100))*&quot;Viral_titre_level_day_7_(untreated)&quot;))</eqn>
			</aux>
			<aux name="IS Infectivity Day 8">
				<eqn>(((&quot;Share_of_IS_treated_day_2_(%)&quot;/100)*&quot;Viral_titre_level_day_8_(treated)&quot;)+
((1-(&quot;Share_of_IS_treated_day_2_(%)&quot;/100))*&quot;Viral_titre_level_day_8_(untreated)&quot;))</eqn>
			</aux>
			<aux name="IS Relative Infectivity">
				<eqn>((IS_Day_2*IS_Infectivity_Day_2)+
(IS_Day_3*IS_Infectivity_Day_3)+(IS_Day_4*IS_Infectivity_Day_4)+(IS_Day_5*IS_Infectivity_Day_5)+(IS_Day_6*IS_Infectivity_Day_6)+(IS_Day_7*IS_Infectivity_Day_7)+(IS_Day_8*IS_Infectivity_Day_8))</eqn>
			</aux>
			<stock name="IS Day 3">
				<eqn>0</eqn>
				<inflow>IS_Day_2t3</inflow>
				<outflow>IS_Day_3t4</outflow>
				<conveyor discrete="true">
					<len>1</len>
				</conveyor>
			</stock>
			<stock name="IS Day 4">
				<eqn>0</eqn>
				<inflow>IS_Day_3t4</inflow>
				<outflow>IS_Day_4t5</outflow>
				<conveyor discrete="true">
					<len>1</len>
				</conveyor>
			</stock>
			<stock name="IS Day 5">
				<eqn>0</eqn>
				<inflow>IS_Day_4t5</inflow>
				<outflow>IS_Day_5t6</outflow>
				<conveyor discrete="true">
					<len>1</len>
				</conveyor>
			</stock>
			<stock name="IS Day 6">
				<eqn>0</eqn>
				<inflow>IS_Day_5t6</inflow>
				<outflow>IS_Day_6t7</outflow>
				<conveyor discrete="true">
					<len>1</len>
				</conveyor>
			</stock>
			<stock name="IS Day 7">
				<eqn>0</eqn>
				<inflow>IS_Day_6t7</inflow>
				<outflow>IS_Day_7t8</outflow>
				<conveyor discrete="true">
					<len>1</len>
				</conveyor>
			</stock>
			<stock name="IS Day 8">
				<eqn>0</eqn>
				<inflow>IS_Day_7t8</inflow>
				<outflow>IS_Day_8_out</outflow>
				<conveyor discrete="true">
					<len>1</len>
				</conveyor>
			</stock>
			<flow name="IS Day 3t4">
				<eqn>0</eqn>
				<non_negative/>
			</flow>
			<flow name="IS Day 4t5">
				<eqn>0</eqn>
				<non_negative/>
			</flow>
			<flow name="IS Day 5t6">
				<eqn>0</eqn>
				<non_negative/>
			</flow>
			<flow name="IS Day 6t7">
				<eqn>0</eqn>
				<non_negative/>
			</flow>
			<flow name="IS Day 7t8">
				<eqn>0</eqn>
				<non_negative/>
			</flow>
			<flow name="IS Day 8 out">
				<eqn>0</eqn>
				<non_negative/>
			</flow>
			<aux name="Share of IS treated day 2 (%)">
				<eqn>40</eqn>
			</aux>
			<aux name="INS infectivity day 2">
				<eqn>(((&quot;Share_of_INS_treated_day_2_(%)&quot;/100)*&quot;Viral_titre_level_day_2_(treated)&quot;)+
((1-(&quot;Share_of_INS_treated_day_2_(%)&quot;/100))*&quot;Viral_titre_level_day_2_(untreated)&quot;))</eqn>
			</aux>
			<aux name="INS infectivity day 3">
				<eqn>(((&quot;Share_of_INS_treated_day_2_(%)&quot;/100)*&quot;Viral_titre_level_day_3_(treated)&quot;)+
((1-(&quot;Share_of_INS_treated_day_2_(%)&quot;/100))*&quot;Viral_titre_level_day_3_(untreated)&quot;))</eqn>
			</aux>
			<aux name="INS infectivity day 4">
				<eqn>(((&quot;Share_of_INS_treated_day_2_(%)&quot;/100)*&quot;Viral_titre_level_day_4_(treated)&quot;)+
((1-(&quot;Share_of_INS_treated_day_2_(%)&quot;/100))*&quot;Viral_titre_level_day_4_(untreated)&quot;))</eqn>
			</aux>
			<aux name="INS infectivity day 5">
				<eqn>(((&quot;Share_of_INS_treated_day_2_(%)&quot;/100)*&quot;Viral_titre_level_day_5_(treated)&quot;)+
((1-(&quot;Share_of_INS_treated_day_2_(%)&quot;/100))*&quot;Viral_titre_level_day_5_(untreated)&quot;))</eqn>
			</aux>
			<aux name="INS infectivity day 6">
				<eqn>(((&quot;Share_of_INS_treated_day_2_(%)&quot;/100)*&quot;Viral_titre_level_day_6_(treated)&quot;)+
((1-(&quot;Share_of_INS_treated_day_2_(%)&quot;/100))*&quot;Viral_titre_level_day_6_(untreated)&quot;))</eqn>
			</aux>
			<aux name="INS infectivity day 7">
				<eqn>(((&quot;Share_of_INS_treated_day_2_(%)&quot;/100)*&quot;Viral_titre_level_day_7_(treated)&quot;)+
((1-(&quot;Share_of_INS_treated_day_2_(%)&quot;/100))*&quot;Viral_titre_level_day_7_(untreated)&quot;))</eqn>
			</aux>
			<aux name="INS infectivity day 8">
				<eqn>(((&quot;Share_of_INS_treated_day_2_(%)&quot;/100)*&quot;Viral_titre_level_day_8_(treated)&quot;)+
((1-(&quot;Share_of_INS_treated_day_2_(%)&quot;/100))*&quot;Viral_titre_level_day_8_(untreated)&quot;))</eqn>
			</aux>
			<aux name="INS Relative infectivity">
				<eqn>((INS_Day_2*INS_infectivity_day_2)+(INS_Day_3*INS_infectivity_day_3)+(INS_Day_4*INS_infectivity_day_4)+(INS_Day_5*INS_infectivity_day_5)+(INS_Day_6*INS_infectivity_day_6)+(INS_Day_7*INS_infectivity_day_7)+(INS_Day_8*INS_infectivity_day_8))</eqn>
			</aux>
			<stock name="INS Day 2">
				<eqn>0</eqn>
				<inflow>INS</inflow>
				<outflow>INS_Day_2t3</outflow>
				<conveyor discrete="true">
					<len>1</len>
				</conveyor>
			</stock>
			<stock name="INS Day 3">
				<eqn>0</eqn>
				<inflow>INS_Day_2t3</inflow>
				<outflow>INS_Day_3t4</outflow>
				<conveyor discrete="true">
					<len>1</len>
				</conveyor>
			</stock>
			<stock name="INS Day 4">
				<eqn>0</eqn>
				<inflow>INS_Day_3t4</inflow>
				<outflow>INS_Day_4t5</outflow>
				<conveyor discrete="true">
					<len>1</len>
				</conveyor>
			</stock>
			<stock name="INS Day 5">
				<eqn>0</eqn>
				<inflow>INS_Day_4t5</inflow>
				<outflow>INS_Day_5t6</outflow>
				<conveyor discrete="true">
					<len>1</len>
				</conveyor>
			</stock>
			<stock name="INS Day 6">
				<eqn>0</eqn>
				<inflow>INS_Day_5t6</inflow>
				<outflow>INS_Day_6t7</outflow>
				<conveyor discrete="true">
					<len>1</len>
				</conveyor>
			</stock>
			<stock name="INS Day 7">
				<eqn>0</eqn>
				<inflow>INS_Day_6t7</inflow>
				<outflow>INS_Day_7t8</outflow>
				<conveyor discrete="true">
					<len>1</len>
				</conveyor>
			</stock>
			<stock name="INS Day 8">
				<eqn>0</eqn>
				<inflow>INS_Day_7t8</inflow>
				<outflow>INS_Day_8_out</outflow>
				<conveyor discrete="true">
					<len>1</len>
				</conveyor>
			</stock>
			<flow name="INS Day 2t3">
				<eqn>0</eqn>
				<non_negative/>
			</flow>
			<flow name="INS Day 3t4">
				<eqn>0</eqn>
				<non_negative/>
			</flow>
			<flow name="INS Day 4t5">
				<eqn>0</eqn>
				<non_negative/>
			</flow>
			<flow name="INS Day 5t6">
				<eqn>0</eqn>
				<non_negative/>
			</flow>
			<flow name="INS Day 6t7">
				<eqn>0</eqn>
				<non_negative/>
			</flow>
			<flow name="INS Day 7t8">
				<eqn>0</eqn>
				<non_negative/>
			</flow>
			<flow name="INS Day 8 out">
				<eqn>0</eqn>
				<non_negative/>
			</flow>
			<aux name="Share of INS treated day 2 (%)">
				<eqn>5</eqn>
			</aux>
			<flow name="INS">
				<eqn>(1-&quot;Diagnostic_accuracy_at_Emergency_(%)&quot;/100)*
Influenza_season*
&quot;Total_#_influenza_patients_from_Emergency&quot;</eqn>
				<non_negative/>
			</flow>
			<aux name="Diagnostic accuracy\nat Emergency (%)">
				<eqn>60</eqn>
			</aux>
			<aux name="IS sum">
				<eqn>IS_Day_2+IS_Day_3+IS_Day_4+IS_Day_5+IS_Day_6+IS_Day_7+IS_Day_8</eqn>
			</aux>
			<aux name="INS sum">
				<eqn>INS_Day_2+INS_Day_3+INS_Day_4+INS_Day_5+INS_Day_6+INS_Day_7+INS_Day_8</eqn>
			</aux>
			<aux name="HCAI sum">
				<eqn>HCAI_Day_1+HCAI_Day2+SU_Dag_3+HCAI_Day_4+HCAI_Day_5+HCAI_Day_6+HCAI_Day_7+HCAI_Day_8</eqn>
			</aux>
			<stock name="Accumulated HCAI infected by Influenza suspected">
				<eqn>0</eqn>
				<inflow>Flow_1</inflow>
				<non_negative/>
			</stock>
			<flow name="Flow 1">
				<eqn>Not_influenza
*
Calibration_factor/10*


((1-&quot;Ratio_non-flu_receiving_prophylactic_medication_(%)&quot;/100)
+
(&quot;Ratio_non-flu_receiving_prophylactic_medication_(%)&quot;/100)

*(1-&quot;Prophylactic_effectiveness_(%)&quot;/100))


*
&quot;Average_#_other_exposed_patients_in_shared_rooms&quot;

*
(
(1-&quot;Vaccination_coverage_(%)&quot;/100)+
((&quot;Vaccination_coverage_(%)&quot;/100)*(1-&quot;Vaccine_effectiveness_(%)&quot;/100))
)
*

(
(
IS_Relative_Infectivity)
/

(HCAI_Relative_Infectivity+IS_Relative_Infectivity+INS_Relative_infectivity+

Not_influenza)
)</eqn>
				<non_negative/>
			</flow>
			<stock name="Accumulated HCAI\ninfected by Influenza not suspected">
				<eqn>0</eqn>
				<inflow>Flow_2</inflow>
				<non_negative/>
			</stock>
			<flow name="Flow 2">
				<eqn>Not_influenza
*
Calibration_factor/10*


((1-&quot;Ratio_non-flu_receiving_prophylactic_medication_(%)&quot;/100)
+
(&quot;Ratio_non-flu_receiving_prophylactic_medication_(%)&quot;/100)

*(1-&quot;Prophylactic_effectiveness_(%)&quot;/100))


*
&quot;Average_#_other_exposed_patients_in_shared_rooms&quot;

*
(
(1-&quot;Vaccination_coverage_(%)&quot;/100)+
((&quot;Vaccination_coverage_(%)&quot;/100)*(1-&quot;Vaccine_effectiveness_(%)&quot;/100))
)
*

(
(
INS_Relative_infectivity)
/

(HCAI_Relative_Infectivity+IS_Relative_Infectivity+INS_Relative_infectivity+

Not_influenza)
)</eqn>
				<non_negative/>
			</flow>
			<stock name="Accumulated HCAI infected by HCAI">
				<eqn>0</eqn>
				<inflow>Flow_3</inflow>
				<non_negative/>
			</stock>
			<flow name="Flow 3">
				<eqn>Not_influenza
*
Calibration_factor/10*


((1-&quot;Ratio_non-flu_receiving_prophylactic_medication_(%)&quot;/100)
+
(&quot;Ratio_non-flu_receiving_prophylactic_medication_(%)&quot;/100)

*(1-&quot;Prophylactic_effectiveness_(%)&quot;/100))


*
&quot;Average_#_other_exposed_patients_in_shared_rooms&quot;

*
(
(1-&quot;Vaccination_coverage_(%)&quot;/100)+
((&quot;Vaccination_coverage_(%)&quot;/100)*(1-&quot;Vaccine_effectiveness_(%)&quot;/100))
)
*

(
(HCAI_Relative_Infectivity)
/

(HCAI_Relative_Infectivity+IS_Relative_Infectivity+INS_Relative_infectivity+

Not_influenza)
)</eqn>
				<non_negative/>
			</flow>
			<stock name="IS Day 2">
				<eqn>0</eqn>
				<inflow>IS</inflow>
				<outflow>IS_Day_2t3</outflow>
				<conveyor discrete="true">
					<len>1</len>
				</conveyor>
			</stock>
			<flow name="IS Day 2t3">
				<eqn>0</eqn>
				<non_negative/>
			</flow>
			<aux name="IS Infectivity Day 2">
				<eqn>(((&quot;Share_of_IS_treated_day_2_(%)&quot;/100)*&quot;Viral_titre_level_day_2_(treated)&quot;)+
((1-(&quot;Share_of_IS_treated_day_2_(%)&quot;/100))*&quot;Viral_titre_level_day_2_(untreated)&quot;))</eqn>
			</aux>
			<aux name="Season 17--18">
				<eqn>TIME</eqn>
				<gf>
					<xscale min="1" max="225"/>
					<yscale min="0" max="2"/>
					<ypts>0.006979877014567,0.00707958954334653,0.00717930207212606,0.00727901460090559,0.00737872712968512,0.00747843965846465,0.00757815218724418,0.0076778647160237,0.006979877014567,0.0062818893131103,0.0055839016116536,0.0048859139101969,0.0041879262087402,0.0034899385072835,0.0027919508058268,0.00329051344972444,0.00378907609362209,0.00428763873751973,0.00478620138141737,0.00528476402531502,0.00578332666921266,0.0062818893131103,0.00648131437066936,0.00668073942822842,0.00688016448578747,0.00707958954334653,0.00727901460090559,0.00747843965846465,0.0076778647160237,0.00907384011893711,0.0104698155218505,0.0118657909247639,0.0132617663276773,0.0146577417305907,0.0160537171335041,0.0174496925364175,0.0197430806983467,0.0220364688602758,0.024329857022205,0.0266232451841342,0.0289166333460633,0.0312100215079925,0.0335034096699216,0.0354976602455122,0.0374919108211028,0.0394861613966933,0.0414804119722839,0.0434746625478745,0.0454689131234651,0.0474631636990556,0.0472637386414966,0.0470643135839375,0.0468648885263784,0.0466654634688194,0.0464660384112603,0.0462666133537013,0.0460671882961422,0.0512522397926777,0.0564372912892132,0.0616223427857487,0.0668073942822842,0.0719924457788197,0.0771774972753552,0.0823625487718906,0.0890432882001191,0.0957240276283475,0.102404767056576,0.109085506484804,0.115766245913033,0.122446985341261,0.12912772476949,0.144084604086419,0.159041483403348,0.173998362720278,0.188955242037207,0.203912121354136,0.218869000671065,0.233825879987995,0.251474997581971,0.269124115175948,0.286773232769924,0.304422350363901,0.322071467957877,0.339720585551854,0.357369703145831,0.370033194300831,0.382696685455831,0.395360176610831,0.408023667765831,0.420687158920831,0.433350650075832,0.446014141230832,0.444119603184021,0.442225065137209,0.440330527090398,0.438435989043587,0.436541450996776,0.434646912949965,0.432752374903154,0.443122477896225,0.453492580889296,0.463862683882367,0.474232786875438,0.484602889868509,0.49497299286158,0.505343095854651,0.54143903127284,0.57753496669103,0.613630902109219,0.649726837527409,0.685822772945598,0.721918708363788,0.758014643781977,0.795506554603079,0.832998465424182,0.870490376245285,0.907982287066388,0.94547419788749,0.982966108708593,1.0204580195297,1.06104101874296,1.10162401795623,1.1422070171695,1.18279001638277,1.22337301559604,1.26395601480931,1.30453901402257,1.33335593483986,1.36217285565714,1.39098977647442,1.41980669729171,1.44862361810899,1.47744053892628,1.50625745974356,1.48471955352718,1.4631816473108,1.44164374109443,1.42010583487805,1.39856792866167,1.37703002244529,1.35549211622891,1.33594846058812,1.31640480494734,1.29686114930655,1.27731749366576,1.25777383802497,1.23823018238419,1.2186865267434,1.20243338455234,1.18618024236127,1.16992710017021,1.15367395797915,1.13742081578808,1.12116767359702,1.10491453140596,1.07230853449505,1.03970253758415,1.00709654067324,0.974490543762333,0.941884546851427,0.909278549940521,0.876672553029616,0.868894975784812,0.861117398540009,0.853339821295206,0.845562244050403,0.837784666805599,0.830007089560796,0.822229512315993,0.794509429315284,0.766789346314575,0.739069263313866,0.711349180313157,0.683629097312448,0.655909014311739,0.62818893131103,0.617918540846739,0.607648150382447,0.597377759918156,0.587107369453864,0.576836978989573,0.566566588525282,0.55629619806099,0.525385314139336,0.494474430217682,0.463563546296029,0.432652662374375,0.401741778452721,0.370830894531067,0.339920010609413,0.324065718533468,0.308211426457523,0.292357134381578,0.276502842305633,0.260648550229688,0.244794258153743,0.228939966077798,0.211091423426262,0.193242880774726,0.175394338123191,0.157545795471655,0.13969725282012,0.121848710168584,0.104000167517048,0.0977182782039381,0.0914363888908277,0.0851544995777174,0.0788726102646071,0.0725907209514968,0.0663088316383865,0.0600269423252762,0.0569358539331108,0.0538447655409455,0.0507536771487801,0.0476625887566147,0.0445715003644493,0.0414804119722839,0.0383893235801185,0.0329051344972444,0.0274209454143704,0.0219367563314963,0.0164525672486222,0.0109683781657482,0.00548418908287408,0</ypts>
				</gf>
			</aux>
			<aux name="Viral titre level\nday 1 (untreated)">
				<eqn>.432</eqn>
			</aux>
			<aux name="Viral titre level\nday 2 (untreated)">
				<eqn>1.486</eqn>
			</aux>
			<aux name="Viral titre level\nday 4 (untreated)">
				<eqn>1.730</eqn>
			</aux>
			<aux name="Viral titre level\nday 5 (untreated)">
				<eqn>1.027</eqn>
			</aux>
			<aux name="Viral titre level\nday 6 (untreated)">
				<eqn>0.541</eqn>
			</aux>
			<aux name="Viral titre level\nday 7 (untreated)">
				<eqn>0.297</eqn>
			</aux>
			<aux name="Viral titre level\nday 8 (untreated)">
				<eqn>0.135</eqn>
			</aux>
			<aux name="Viral titre level\nday 3 (untreated)">
				<eqn>2.351</eqn>
			</aux>
			<aux name="Viral titre level\nday 1 (treated)">
				<eqn>.432</eqn>
			</aux>
			<aux name="Viral titre level\nday 2 (treated)">
				<eqn>1.486</eqn>
			</aux>
			<aux name="Viral titre level\nday 4 (treated)">
				<eqn>1.027</eqn>
			</aux>
			<aux name="Viral titre level\nday 5 (treated)">
				<eqn>.541</eqn>
			</aux>
			<aux name="Viral titre level\nday 6 (treated)">
				<eqn>.297</eqn>
			</aux>
			<aux name="Viral titre level\nday 7 (treated)">
				<eqn>0.135</eqn>
			</aux>
			<aux name="Viral titre level\nday 8 (treated)">
				<eqn>0.0001</eqn>
			</aux>
			<aux name="Viral titre level\nday 3 (treated)">
				<eqn>2.351</eqn>
			</aux>
			<aux name="Average viral titre\nlevel treated day 1-8 (should be 1,00)">
				<eqn>MEAN(&quot;Viral_titre_level_day_1_(untreated)&quot;, &quot;Viral_titre_level_day_2_(untreated)&quot;, &quot;Viral_titre_level_day_3_(untreated)&quot;, &quot;Viral_titre_level_day_4_(untreated)&quot;, &quot;Viral_titre_level_day_5_(untreated)&quot;, &quot;Viral_titre_level_day_6_(untreated)&quot;, &quot;Viral_titre_level_day_7_(untreated)&quot;, &quot;Viral_titre_level_day_8_(untreated)&quot;)</eqn>
			</aux>
			<aux name="Ratio non-flu\nreceiving prophylactic\nmedication (%)">
				<eqn>30</eqn>
			</aux>
			<aux name="Prophylactic effectiveness (%)">
				<eqn>80</eqn>
			</aux>
			<stock name="Total IS">
				<eqn>0</eqn>
				<inflow>IS_Day_8_out</inflow>
				<non_negative/>
			</stock>
			<stock name="Total INS">
				<eqn>0</eqn>
				<inflow>INS_Day_8_out</inflow>
				<non_negative/>
			</stock>
			<stock name="Total HCAI">
				<eqn>0</eqn>
				<inflow>HCAI_Day_8_out</inflow>
				<non_negative/>
			</stock>
			<stock name="Accumulated IS">
				<eqn>0</eqn>
				<inflow>Flow_5</inflow>
				<non_negative/>
			</stock>
			<flow name="Flow 5">
				<eqn>IS</eqn>
				<non_negative/>
			</flow>
			<stock name="Accumulated INS">
				<eqn>0</eqn>
				<inflow>Flow_6</inflow>
				<non_negative/>
			</stock>
			<flow name="Flow 6">
				<eqn>INS</eqn>
				<non_negative/>
			</flow>
			<stock name="Acc IS Relative Infectivity">
				<eqn>0</eqn>
				<inflow>Flow_7</inflow>
				<non_negative/>
			</stock>
			<flow name="Flow 7">
				<eqn>IS_Relative_Infectivity</eqn>
				<non_negative/>
			</flow>
			<aux name="S1718">
				<eqn>1</eqn>
			</aux>
			<aux name="S1617">
				<eqn>0</eqn>
			</aux>
			<aux name="Influenza season">
				<eqn>(S1819*&quot;Season_18--19&quot;+S1718*&quot;Season_17--18&quot;+S1617*&quot;Season_16--17&quot;+S1516*&quot;Season_15--16&quot;+S1415*&quot;Season_14--15&quot;+S1314*&quot;Season_13--14&quot;)/100</eqn>
			</aux>
			<aux name="S1516">
				<eqn>0</eqn>
			</aux>
			<aux name="S1415">
				<eqn>0</eqn>
			</aux>
			<aux name="S1314">
				<eqn>0</eqn>
			</aux>
			<aux name="Season 18--19">
				<eqn>TIME</eqn>
				<gf>
					<xscale min="1" max="225"/>
					<yscale min="0" max="2"/>
					<ypts>0.00529296564865294,0.00559542082857597,0.00589787600849899,0.00620033118842202,0.00650278636834504,0.00680524154826807,0.00710769672819109,0.00741015190811412,0.00756137949807563,0.00771260708803714,0.00786383467799866,0.00801506226796017,0.00816628985792168,0.00831751744788319,0.00846874503784471,0.00801506226796017,0.00756137949807563,0.00710769672819109,0.00665401395830655,0.00620033118842202,0.00574664841853748,0.00529296564865294,0.00529296564865294,0.00529296564865294,0.00529296564865294,0.00529296564865294,0.00529296564865294,0.00529296564865294,0.00529296564865294,0.00635155877838353,0.00741015190811412,0.00846874503784471,0.00952733816757529,0.0105859312973059,0.0116445244270365,0.0127031175567671,0.0133080279166131,0.0139129382764592,0.0145178486363052,0.0151227589961513,0.0157276693559973,0.0163325797158434,0.0169374900756894,0.0172399452556124,0.0175424004355355,0.0178448556154585,0.0181473107953815,0.0184497659753045,0.0187522211552276,0.0190546763351506,0.023893959213919,0.0287332420926874,0.0335725249714558,0.0384118078502242,0.0432510907289926,0.048090373607761,0.0529296564865294,0.0615496291143356,0.0701696017421419,0.0787895743699481,0.0874095469977543,0.0960295196255605,0.104649492253367,0.113269464881173,0.129299589417093,0.145329713953014,0.161359838488934,0.177389963024854,0.193420087560775,0.209450212096695,0.225480336632615,0.256330764984764,0.287181193336912,0.318031621689061,0.34888205004121,0.379732478393358,0.410582906745507,0.441433335097655,0.494514219174146,0.547595103250637,0.600675987327128,0.653756871403619,0.70683775548011,0.759918639556601,0.812999523633092,0.817233896152014,0.821468268670936,0.825702641189859,0.829937013708781,0.834171386227703,0.838405758746625,0.842640131265548,0.830390696478666,0.818141261691783,0.8058918269049,0.793642392118018,0.781392957331135,0.769143522544253,0.75689408775737,0.755381811857755,0.75386953595814,0.752357260058525,0.75084498415891,0.749332708259295,0.74782043235968,0.746308156460065,0.773680350243098,0.801052544026132,0.828424737809166,0.8557969315922,0.883169125375234,0.910541319158267,0.937913512941301,0.981315831260255,1.02471814957921,1.06812046789816,1.11152278621712,1.15492510453607,1.19832742285503,1.24172974117398,1.26017950714929,1.27862927312459,1.29707903909989,1.3155288050752,1.3339785710505,1.35242833702581,1.37087810300111,1.35696516472465,1.34305222644819,1.32913928817173,1.31522634989528,1.30131341161882,1.28740047334236,1.2734875350659,1.23643677552533,1.19938601598476,1.16233525644419,1.12528449690362,1.08823373736305,1.05118297782247,1.0141322182819,0.97980355536064,0.945474892439377,0.911146229518113,0.87681756659685,0.842488903675586,0.808160240754323,0.77383157783306,0.749332708259295,0.72483383868553,0.700334969111765,0.675836099538,0.651337229964234,0.626838360390469,0.602339490816705,0.593719518188898,0.585099545561092,0.576479572933286,0.56785960030548,0.559239627677673,0.550619655049867,0.541999682422061,0.533077254614332,0.524154826806603,0.515232398998873,0.506309971191144,0.497387543383415,0.488465115575686,0.479542687767956,0.46986412201042,0.460185556252883,0.450506990495346,0.440828424737809,0.431149858980272,0.421471293222735,0.411792727465199,0.407709582536238,0.403626437607277,0.399543292678316,0.395460147749356,0.391377002820395,0.387293857891434,0.383210712962473,0.384118078502242,0.385025444042011,0.38593280958178,0.386840175121549,0.387747540661318,0.388654906201087,0.389562271740856,0.379278795623474,0.368995319506091,0.358711843388708,0.348428367271325,0.338144891153942,0.327861415036559,0.317577938919177,0.317426711329215,0.317275483739253,0.317124256149292,0.31697302855933,0.316821800969369,0.316670573379407,0.316519345789446,0.293986434885181,0.271453523980915,0.24892061307665,0.226387702172384,0.203854791268119,0.181321880363854,0.158788969459588,0.136104830965361,0.113420692471134,0.0907365539769076,0.0680524154826807,0.0453682769884538,0.0226841384942269,0,0,0,0,0,0,0,0</ypts>
				</gf>
			</aux>
			<aux name="S1819">
				<eqn>1</eqn>
			</aux>
			<aux name="Ratio infected - non-infected">
				<eqn>100*HCAI/From_Emergency_not_influenza</eqn>
			</aux>
		</variables>
		<views>
			<style color="black" background="white" font_style="normal" font_weight="normal" text_decoration="none" text_align="center" vertical_text_align="center" font_color="black" font_family="Arial" font_size="10pt" padding="2" border_color="black" border_width="thin" border_style="none">
				<text_box color="black" background="white" text_align="left" vertical_text_align="top" font_size="12pt"/>
				<isee:loop_indicator color="black" background="white" text_align="left" vertical_text_align="top" font_size="12pt"/>
				<numeric_display color="blue" background="white" font_size="12pt" isee:transparent="false"/>
				<graph color="black" background="white" font_size="12pt" axis_color="#666666" grid_color="#C8C8C8" isee:graph_area_color="white" legend_position="bottom" isee:transparent="false" isee:hide_border="false" axis_title_font_style="normal" axis_title_font_weight="normal" axis_title_text_decoration="none" axis_title_text_align="center" axis_title_vertical_text_align="center" axis_title_font_color="black" axis_title_font_family="Arial" axis_title_font_size="12pt" axis_title_text_padding="2" axis_title_text_border_color="black" axis_title_text_border_width="thin" axis_title_text_border_style="none" axis_label_font_style="normal" axis_label_font_weight="normal" axis_label_text_decoration="none" axis_label_text_align="center" axis_label_vertical_text_align="center" axis_label_font_color="black" axis_label_font_family="Arial" axis_label_font_size="9pt" axis_label_text_padding="2" axis_label_text_border_color="black" axis_label_text_border_width="thin" axis_label_text_border_style="none">
					<isee:series_styles>
						<isee:series_style color="blue" thickness="1"/>
						<isee:series_style color="red" thickness="1" pen_style="dot_dashed"/>
						<isee:series_style color="fuchsia" thickness="1" pen_style="dotted"/>
						<isee:series_style color="#008F44" thickness="1" pen_style="dashed"/>
						<isee:series_style color="#FF7F00" thickness="1"/>
						<isee:series_style color="#7F00FF" thickness="1" pen_style="dot_dashed"/>
						<isee:series_style color="#0CA0FF" thickness="1" pen_style="dotted"/>
						<isee:series_style color="lime" thickness="1" pen_style="dashed"/>
						<isee:series_style color="#FF007F" thickness="1"/>
						<isee:series_style color="aqua" thickness="1" pen_style="dot_dashed"/>
						<isee:series_style color="#F586FF" thickness="1" pen_style="dotted"/>
						<isee:series_style color="black" thickness="1" pen_style="dashed"/>
						<isee:series_style color="#C8C8C8" thickness="1"/>
					</isee:series_styles>
				</graph>
				<table color="black" background="#E0E0E0" text_align="right" font_size="12pt" orientation="vertical" wrap_text="false" isee:auto_fit="true" isee:use_alternate_row_colors="false" isee:unlimited_table_length="false" blank_column_width="80" column_width="160" interval="1" report_balances="beginning" report_flows="instantaneous" header_font_style="normal" header_font_weight="normal" header_text_decoration="none" header_text_align="center" header_vertical_text_align="center" header_font_color="black" header_font_family="Arial" header_font_size="12pt" header_text_padding="2" header_text_border_color="black" header_text_border_width="thin" header_text_border_style="none"/>
				<button color="black" background="#E0E0E0" font_size="12pt" border_width="thin" border_style="solid" transparent="false" corner_radius="0" isee:flat="false" icon_side="top" isee:highlight_on_hover="false" isee:highlight_color="#959595"/>
				<isee:annotation color="black" background="#E0E0E0" font_size="12pt" border_width="thin" border_style="solid" transparent="false" corner_radius="0" isee:flat="false" icon_side="top" isee:highlight_on_hover="false" isee:highlight_color="#959595" popup_corner_radius="0" popup_background_color="#FFFECF"/>
				<slider color="black" background="#E0E0E0" font_size="12pt" num_ticks="3" label_side="top" wrap_title="true" vertical="false" isee:fancy_appearance="false" isee:show_hover_tip="when_deciding" input_expands="true" input_width="100"/>
				<isee:dual_slider color="black" background="white" font_size="12pt" num_ticks="3" label_side="top" wrap_title="true" isee:show_hover_tip="when_deciding" input_expands="true" input_width="100"/>
				<isee:sim_speed_slider color="black" background="white" font_size="12pt"/>
				<isee:time_slider color="black" background="white" font_size="12pt"/>
				<isee:pie_input color="black" background="white" font_size="12pt" legend_position="bottom" isee:transparent="false"/>
				<knob color="#66CC66" background="#E0E0E0" font_size="12pt" label_side="bottom" wrap_title="true"/>
				<numeric_input color="black" background="#E0E0E0" font_size="12pt" label_side="left" wrap_title="true" input_expands="false" input_width="100"/>
				<switch color="black" background="#E0E0E0" font_size="12pt" label_side="top" wrap_title="true" isee:appearance="switch" isee:on_color="green"/>
				<options color="black" background="white" font_size="12pt" appearance="radio-buttons" arrangement="vertical"/>
				<graphical_input color="black" background="#E0E0E0" font_size="12pt" isee:show_hover_tip="true"/>
				<group_input color="black" background="#E0E0E0" font_size="12pt"/>
				<lamp color="black" background="white" font_size="12pt"/>
				<gauge color="black" background="white" font_size="12pt" needle_color="#F09F72" bar_color="#EEEEEE" bar_progress_color="black" appearance="radial" num_major_ticks="11" num_minor_ticks="11" show_numeric_value="true"/>
				<isee:spatial_map color="black" background="white" font_size="12pt"/>
				<isee:animation_object color="black" background="white" font_size="12pt"/>
				<isee:navigation_widget color="black" background="white" text_align="left" vertical_text_align="top" font_size="12pt" border_color="#999999" border_width="thin" border_style="solid" item_spacing="6" appearance="tabs" corner_radius="4" selected_item_color="black" selected_item_background="white" item_background="#DDDDDD"/>
				<isee:shape color="black" background="white" text_align="left" vertical_text_align="top" font_size="12pt" border_width="thin" border_style="solid" opacity="1" transparent_background="true"/>
				<isee:selector color="black" background="white" text_align="left" vertical_text_align="top" font_size="12pt"/>
				<isee:iframe color="black" background="white" text_align="left" vertical_text_align="top" font_size="12pt" border_width="thin" border_style="solid"/>
				<isee:financial_table color="black" background="white" text_align="right" font_size="12pt" hide_border="false" auto_fit="true" first_column_width="250" other_column_width="100" header_font_style="normal" header_font_weight="bold" header_text_decoration="none" header_text_align="center" header_vertical_text_align="center" header_font_color="black" header_font_family="Arial" header_font_size="14pt" header_text_padding="2" header_text_border_color="black" header_text_border_width="thin" header_text_border_style="none"/>
			</style>
			<view isee:show_pages="false" background="white" page_width="806" page_height="571" isee:page_cols="3" isee:page_rows="4" zoom="140" isee:popup_graphs_are_comparative="true" isee:enable_non_negative_highlights="false" type="stock_flow">
				<style color="black" background="white" font_style="normal" font_weight="normal" text_decoration="none" text_align="center" vertical_text_align="center" font_color="black" font_family="Arial" font_size="10pt" padding="2" border_color="black" border_width="thin" border_style="none">
					<stock color="blue" background="white" font_color="blue" font_size="9pt" label_side="top">
						<shape type="rectangle" width="45" height="35"/>
					</stock>
					<flow color="blue" background="white" font_color="blue" font_size="9pt" label_side="bottom"/>
					<isee:placeholder color="#228B22" background="white" font_color="#228B22" label_side="bottom"/>
					<module color="blue" background="white" font_color="blue" font_size="9pt" label_side="top">
						<shape type="rectangle" width="55" height="45"/>
					</module>
					<aux color="blue" background="white" font_color="blue" font_size="9pt" label_side="bottom">
						<shape type="circle" radius="18"/>
					</aux>
					<group color="red" background="white" font_color="red" font_size="9pt"/>
					<connector color="#FF007F" background="white" font_color="#FF007F" font_size="9pt" isee:thickness="1"/>
					<text_box color="black" background="white" text_align="left" vertical_text_align="top" font_size="12pt"/>
					<isee:loop_indicator color="black" background="white" text_align="left" vertical_text_align="top" font_size="12pt"/>
					<numeric_display color="blue" background="white" font_size="9pt" isee:transparent="false"/>
					<graph color="black" background="white" font_size="12pt" axis_color="#666666" grid_color="#C8C8C8" isee:graph_area_color="white" legend_position="bottom" isee:transparent="false" isee:hide_border="false" axis_title_font_style="normal" axis_title_font_weight="normal" axis_title_text_decoration="none" axis_title_text_align="center" axis_title_vertical_text_align="center" axis_title_font_color="black" axis_title_font_family="Arial" axis_title_font_size="12pt" axis_title_text_padding="2" axis_title_text_border_color="black" axis_title_text_border_width="thin" axis_title_text_border_style="none" axis_label_font_style="normal" axis_label_font_weight="normal" axis_label_text_decoration="none" axis_label_text_align="center" axis_label_vertical_text_align="center" axis_label_font_color="black" axis_label_font_family="Arial" axis_label_font_size="9pt" axis_label_text_padding="2" axis_label_text_border_color="black" axis_label_text_border_width="thin" axis_label_text_border_style="none">
						<isee:series_styles>
							<isee:series_style color="blue" thickness="1"/>
							<isee:series_style color="red" thickness="1" pen_style="dot_dashed"/>
							<isee:series_style color="fuchsia" thickness="1" pen_style="dotted"/>
							<isee:series_style color="#008F44" thickness="1" pen_style="dashed"/>
							<isee:series_style color="#FF7F00" thickness="1"/>
							<isee:series_style color="#7F00FF" thickness="1" pen_style="dot_dashed"/>
							<isee:series_style color="#0CA0FF" thickness="1" pen_style="dotted"/>
							<isee:series_style color="lime" thickness="1" pen_style="dashed"/>
							<isee:series_style color="#FF007F" thickness="1"/>
							<isee:series_style color="aqua" thickness="1" pen_style="dot_dashed"/>
							<isee:series_style color="#F586FF" thickness="1" pen_style="dotted"/>
							<isee:series_style color="black" thickness="1" pen_style="dashed"/>
							<isee:series_style color="#C8C8C8" thickness="1"/>
						</isee:series_styles>
					</graph>
					<table color="black" background="#E0E0E0" text_align="right" font_size="12pt" orientation="vertical" wrap_text="false" isee:auto_fit="true" isee:use_alternate_row_colors="false" isee:unlimited_table_length="false" blank_column_width="80" column_width="160" interval="1" report_balances="beginning" report_flows="instantaneous" header_font_style="normal" header_font_weight="normal" header_text_decoration="none" header_text_align="center" header_vertical_text_align="center" header_font_color="black" header_font_family="Yb��" header_font_size="12pt" header_text_padding="2" header_text_border_color="black" header_text_border_width="thin" header_text_border_style="none"/>
				</style>
				<stock color="#108001" font_color="#108001" x="375.5" y="167" name="Not influenza"/>
				<flow color="#108001" font_color="#108001" x="294.25" y="164.167" name="From Emergency not influenza">
					<pts>
						<pt x="235.5" y="164.167"/>
						<pt x="353" y="164.167"/>
					</pts>
				</flow>
				<flow color="#108001" font_color="#108001" x="811.165" y="167.5" name="Not influensa leaving">
					<pts>
						<pt x="398" y="167.5"/>
						<pt x="1248.33" y="167.5"/>
					</pts>
				</flow>
				<aux label_side="top" x="876.417" y="105.833" name="Care time, not influenza"/>
				<connector uid="1" angle="261.258">
					<from>&quot;Care_time,_not_influenza&quot;</from>
					<to>Not_influensa_leaving</to>
				</connector>
				<text_box font_weight="bold" font_size="18pt" uid="2" x="214.167" y="57" width="272.834" height="27.9999">Not influenza</text_box>
				<flow color="#6666FF" font_color="#6666FF" x="374.667" y="659.167" name="IS">
					<pts>
						<pt x="265.5" y="659.167"/>
						<pt x="483.834" y="659.167"/>
					</pts>
				</flow>
				<aux color="black" font_color="black" x="332.583" y="205.833" name="Average # other exposed\npatients in shared rooms"/>
				<flow color="#21FF06" font_color="#21FF06" label_side="left" x="376.083" y="273.75" name="HCAI">
					<pts>
						<pt x="376.083" y="184.5"/>
						<pt x="376.083" y="375"/>
					</pts>
				</flow>
				<connector uid="3" angle="17.3241">
					<from>&quot;Average_#_other_exposed_patients_in_shared_rooms&quot;</from>
					<to>HCAI</to>
				</connector>
				<aux color="black" font_color="black" x="271.25" y="198.667" name="Calibration factor"/>
				<connector uid="4" angle="324.389">
					<from>Calibration_factor</from>
					<to>HCAI</to>
				</connector>
				<aux color="black" font_color="black" label_side="right" label_angle="45" x="189" y="140.5" name="Total ED arrivals per year"/>
				<connector uid="5" angle="15.7808">
					<from>Total_ED_arrivals_per_year</from>
					<to>From_Emergency_not_influenza</to>
				</connector>
				<connector uid="6" angle="37.7262">
					<from>Not_influenza</from>
					<to>Not_influensa_leaving</to>
				</connector>
				<connector uid="7" angle="299.055">
					<from>Not_influenza</from>
					<to>HCAI</to>
				</connector>
				<stock color="blue" x="245.584" y="1288.33" name="Accumulated Hospital-associated\ninfluenza (HCAI)"/>
				<flow color="blue" x="167.209" y="1288.33" name="Infected HCAI">
					<pts>
						<pt x="111.334" y="1288.33"/>
						<pt x="223.084" y="1288.33"/>
					</pts>
				</flow>
				<aux color="black" font_color="black" x="184.5" y="592" name="Season free"/>
				<aux color="black" font_color="black" x="51.5003" y="666" width="18" height="18" name="Season 16--17"/>
				<aux color="black" font_color="black" x="51.5003" y="697.917" width="18" height="18" name="Season 15--16"/>
				<aux color="black" font_color="black" x="51.5003" y="735.417" width="18" height="18" name="Season 14--15"/>
				<aux color="black" font_color="black" x="51.5003" y="771.417" width="18" height="18" name="Season 13--14"/>
				<aux x="325" y="777.5" name="Total # influenza\npatients from Emergency"/>
				<connector uid="8" angle="75.2917">
					<from>
						<alias uid="9"/>
					</from>
					<to>From_Emergency_not_influenza</to>
				</connector>
				<aux color="black" font_color="black" x="225.75" y="216.667" name="Vaccination coverage (%)"/>
				<aux color="black" font_color="black" x="225.75" y="255.75" name="Vaccine effectiveness (%)"/>
				<connector uid="10" angle="339.208">
					<from>&quot;Vaccination_coverage_(%)&quot;</from>
					<to>HCAI</to>
				</connector>
				<aux color="#21FF06" font_color="#21FF06" x="369" y="459" name="HCAI Infectvity Day 1"/>
				<aux color="#21FF06" font_color="#21FF06" x="484" y="459" name="HCAI Infectvity Day 2"/>
				<aux color="#21FF06" font_color="#21FF06" x="599" y="459" name="HCAI Infectvity Day 3"/>
				<aux color="#21FF06" font_color="#21FF06" x="724" y="459" name="HCAI Infectvity Day 4"/>
				<aux color="#21FF06" font_color="#21FF06" x="830" y="450" width="21" height="21" name="HCAI Infectvity Day 5"/>
				<aux color="#21FF06" font_color="#21FF06" x="945" y="450" width="16" height="16" name="HCAI Infectvity Day 6"/>
				<aux color="#21FF06" font_color="#21FF06" x="1069" y="459" name="HCAI Infectvity Day 7"/>
				<aux color="#21FF06" font_color="#21FF06" x="1194" y="459" name="HCAI Infectvity Day 8"/>
				<aux color="#21FF06" font_color="#21FF06" x="769" y="560.833" name="HCAI Relative Infectivity"/>
				<connector uid="11" angle="250.427">
					<from>HCAI_Infectvity_Day_1</from>
					<to>HCAI_Relative_Infectivity</to>
				</connector>
				<connector uid="12" angle="178.465">
					<from>HCAI_Infectvity_Day_8</from>
					<to>HCAI_Relative_Infectivity</to>
				</connector>
				<connector uid="13" angle="312.228">
					<from>HCAI_Infectvity_Day_2</from>
					<to>HCAI_Relative_Infectivity</to>
				</connector>
				<connector uid="14" angle="189.92">
					<from>HCAI_Infectvity_Day_7</from>
					<to>HCAI_Relative_Infectivity</to>
				</connector>
				<connector uid="15" angle="317.811">
					<from>HCAI_Infectvity_Day_3</from>
					<to>HCAI_Relative_Infectivity</to>
				</connector>
				<connector uid="16" angle="271.515">
					<from>HCAI_Infectvity_Day_6</from>
					<to>HCAI_Relative_Infectivity</to>
				</connector>
				<connector uid="17" angle="275.308">
					<from>HCAI_Infectvity_Day_4</from>
					<to>HCAI_Relative_Infectivity</to>
				</connector>
				<connector uid="18" angle="293.45">
					<from>HCAI_Infectvity_Day_5</from>
					<to>HCAI_Relative_Infectivity</to>
				</connector>
				<stock color="#21FF06" font_color="#21FF06" label_side="bottom" x="372.5" y="392.5" name="HCAI Day 1"/>
				<stock color="#21FF06" font_color="#21FF06" x="487.5" y="392.5" name="HCAI Day2"/>
				<stock color="#21FF06" font_color="#21FF06" x="602.5" y="392.5" name="SU Dag 3"/>
				<stock color="#21FF06" font_color="#21FF06" x="719.667" y="391.5" name="HCAI Day 4"/>
				<stock color="#21FF06" font_color="#21FF06" x="832.5" y="392.5" name="HCAI Day 5"/>
				<stock color="#21FF06" font_color="#21FF06" x="947.5" y="392.5" name="HCAI Day 6"/>
				<stock color="#21FF06" font_color="#21FF06" x="1062.5" y="392.5" name="HCAI Day 7"/>
				<stock color="#21FF06" font_color="#21FF06" label_side="right" label_angle="45" x="1172.5" y="392.5" name="HCAI Day 8"/>
				<flow color="#21FF06" font_color="#21FF06" x="424" y="391.5" name="HCAI Day 1t2">
					<pts>
						<pt x="395" y="391.5"/>
						<pt x="465" y="391.5"/>
					</pts>
				</flow>
				<flow color="#21FF06" font_color="#21FF06" label_side="bottom" x="539" y="391.5" name="HCAI Day 2t3">
					<pts>
						<pt x="510" y="391.5"/>
						<pt x="580" y="391.5"/>
					</pts>
				</flow>
				<flow color="#21FF06" font_color="#21FF06" x="655.084" y="391.5" name="HCAI Day 3t4">
					<pts>
						<pt x="625" y="391.5"/>
						<pt x="697.167" y="391.5"/>
					</pts>
				</flow>
				<flow color="#21FF06" font_color="#21FF06" x="770.084" y="391.5" name="HCAI Day 4t5">
					<pts>
						<pt x="742.167" y="391.5"/>
						<pt x="810" y="391.5"/>
					</pts>
				</flow>
				<flow color="#21FF06" font_color="#21FF06" x="884" y="391.5" name="HCAI Day 5t6">
					<pts>
						<pt x="855" y="391.5"/>
						<pt x="925" y="391.5"/>
					</pts>
				</flow>
				<flow color="#21FF06" font_color="#21FF06" x="999" y="391.5" name="HCAI Day 6t7">
					<pts>
						<pt x="970" y="391.5"/>
						<pt x="1040" y="391.5"/>
					</pts>
				</flow>
				<flow color="#21FF06" font_color="#21FF06" x="1111.5" y="390" name="HCAI Day 7t8">
					<pts>
						<pt x="1085" y="390"/>
						<pt x="1150" y="390"/>
					</pts>
				</flow>
				<flow color="#21FF06" font_color="#21FF06" x="1216" y="384.5" name="HCAI Day 8 out">
					<pts>
						<pt x="1195" y="384.5"/>
						<pt x="1249" y="384.5"/>
					</pts>
				</flow>
				<connector uid="19" angle="313.711">
					<from>HCAI_Day_1</from>
					<to>HCAI_Relative_Infectivity</to>
				</connector>
				<connector uid="20" angle="302.207">
					<from>HCAI_Day2</from>
					<to>HCAI_Relative_Infectivity</to>
				</connector>
				<connector uid="21" angle="285.522">
					<from>SU_Dag_3</from>
					<to>HCAI_Relative_Infectivity</to>
				</connector>
				<connector uid="22" angle="306.83">
					<from>HCAI_Day_4</from>
					<to>HCAI_Relative_Infectivity</to>
				</connector>
				<connector uid="23" angle="324.858">
					<from>HCAI_Day_5</from>
					<to>HCAI_Relative_Infectivity</to>
				</connector>
				<connector uid="24" angle="295.528">
					<from>HCAI_Day_6</from>
					<to>HCAI_Relative_Infectivity</to>
				</connector>
				<connector uid="25" angle="258.946">
					<from>HCAI_Day_7</from>
					<to>HCAI_Relative_Infectivity</to>
				</connector>
				<connector uid="26" angle="235.974">
					<from>HCAI_Day_8</from>
					<to>HCAI_Relative_Infectivity</to>
				</connector>
				<aux color="#21FF06" font_color="#21FF06" x="769" y="434" name="Share of HCAI treated day 2 (%)"/>
				<connector uid="27" angle="357.457">
					<from>&quot;Share_of_HCAI_treated_day_2_(%)&quot;</from>
					<to>HCAI_Infectvity_Day_8</to>
				</connector>
				<connector uid="28" angle="330.147">
					<from>&quot;Share_of_HCAI_treated_day_2_(%)&quot;</from>
					<to>HCAI_Infectvity_Day_7</to>
				</connector>
				<connector uid="29" angle="354.333">
					<from>&quot;Share_of_HCAI_treated_day_2_(%)&quot;</from>
					<to>HCAI_Infectvity_Day_6</to>
				</connector>
				<connector uid="30" angle="344.093">
					<from>&quot;Share_of_HCAI_treated_day_2_(%)&quot;</from>
					<to>HCAI_Infectvity_Day_5</to>
				</connector>
				<connector uid="31" angle="219.845">
					<from>&quot;Share_of_HCAI_treated_day_2_(%)&quot;</from>
					<to>HCAI_Infectvity_Day_4</to>
				</connector>
				<connector uid="32" angle="192.293">
					<from>&quot;Share_of_HCAI_treated_day_2_(%)&quot;</from>
					<to>HCAI_Infectvity_Day_3</to>
				</connector>
				<connector uid="33" angle="187.433">
					<from>&quot;Share_of_HCAI_treated_day_2_(%)&quot;</from>
					<to>HCAI_Infectvity_Day_2</to>
				</connector>
				<connector uid="34" angle="185.322">
					<from>&quot;Share_of_HCAI_treated_day_2_(%)&quot;</from>
					<to>HCAI_Infectvity_Day_1</to>
				</connector>
				<aux x="610.667" y="727.33" name="IS Infectivity Day 3"/>
				<aux x="719.667" y="721.5" name="IS Infectivity Day 4"/>
				<aux x="832.667" y="711" width="21" height="21" name="IS Infectivity Day 5"/>
				<aux x="944.667" y="713.5" width="16" height="16" name="IS Infectivity Day 6"/>
				<aux x="1058.67" y="721.5" name="IS Infectivity Day 7"/>
				<aux x="1166.67" y="721.5" name="IS Infectivity Day 8"/>
				<aux x="786.667" y="827" name="IS Relative Infectivity"/>
				<connector uid="35" angle="222.797">
					<from>IS_Infectivity_Day_8</from>
					<to>IS_Relative_Infectivity</to>
				</connector>
				<connector uid="36" angle="219.92">
					<from>IS_Infectivity_Day_7</from>
					<to>IS_Relative_Infectivity</to>
				</connector>
				<connector uid="37" angle="284.53">
					<from>IS_Infectivity_Day_3</from>
					<to>IS_Relative_Infectivity</to>
				</connector>
				<connector uid="38" angle="249.305">
					<from>IS_Infectivity_Day_6</from>
					<to>IS_Relative_Infectivity</to>
				</connector>
				<connector uid="39" angle="280.491">
					<from>IS_Infectivity_Day_4</from>
					<to>IS_Relative_Infectivity</to>
				</connector>
				<connector uid="40" angle="252.474">
					<from>IS_Infectivity_Day_5</from>
					<to>IS_Relative_Infectivity</to>
				</connector>
				<stock x="606.667" y="656" name="IS Day 3"/>
				<stock label_side="right" label_angle="45" x="724" y="654.5" name="IS Day 4"/>
				<stock x="847.167" y="656" name="IS Day 5"/>
				<stock label_side="top" x="953.667" y="656" name="IS Day 6"/>
				<stock x="1055.67" y="656" name="IS Day 7"/>
				<stock x="1164.67" y="653" name="IS Day 8"/>
				<flow x="659.334" y="656" name="IS Day 3t4">
					<pts>
						<pt x="629.167" y="656"/>
						<pt x="701.5" y="656"/>
					</pts>
				</flow>
				<flow x="779.584" y="656" name="IS Day 4t5">
					<pts>
						<pt x="746.5" y="656"/>
						<pt x="824.667" y="656"/>
					</pts>
				</flow>
				<flow x="894.417" y="656" name="IS Day 5t6">
					<pts>
						<pt x="869.667" y="656"/>
						<pt x="931.167" y="656"/>
					</pts>
				</flow>
				<flow x="998.669" y="656" name="IS Day 6t7">
					<pts>
						<pt x="976.167" y="656"/>
						<pt x="1033.17" y="656"/>
					</pts>
				</flow>
				<flow x="1104.17" y="654.5" name="IS Day 7t8">
					<pts>
						<pt x="1078.17" y="654.5"/>
						<pt x="1142.17" y="654.5"/>
					</pts>
				</flow>
				<flow x="1212.09" y="649" name="IS Day 8 out">
					<pts>
						<pt x="1187.17" y="649"/>
						<pt x="1249" y="649"/>
					</pts>
				</flow>
				<connector uid="41" angle="255.964">
					<from>IS_Day_3</from>
					<to>IS_Relative_Infectivity</to>
				</connector>
				<connector uid="42" angle="289.965">
					<from>IS_Day_4</from>
					<to>IS_Relative_Infectivity</to>
				</connector>
				<connector uid="43" angle="287.103">
					<from>IS_Day_5</from>
					<to>IS_Relative_Infectivity</to>
				</connector>
				<connector uid="44" angle="264.71">
					<from>IS_Day_6</from>
					<to>IS_Relative_Infectivity</to>
				</connector>
				<connector uid="45" angle="270.895">
					<from>IS_Day_7</from>
					<to>IS_Relative_Infectivity</to>
				</connector>
				<connector uid="46" angle="255.217">
					<from>IS_Day_8</from>
					<to>IS_Relative_Infectivity</to>
				</connector>
				<aux x="777.417" y="693.5" name="Share of IS treated day 2 (%)"/>
				<connector uid="47" angle="355.886">
					<from>&quot;Share_of_IS_treated_day_2_(%)&quot;</from>
					<to>IS_Infectivity_Day_8</to>
				</connector>
				<connector uid="48" angle="320.595">
					<from>&quot;Share_of_IS_treated_day_2_(%)&quot;</from>
					<to>IS_Infectivity_Day_7</to>
				</connector>
				<connector uid="49" angle="350.922">
					<from>&quot;Share_of_IS_treated_day_2_(%)&quot;</from>
					<to>IS_Infectivity_Day_6</to>
				</connector>
				<connector uid="50" angle="336.933">
					<from>&quot;Share_of_IS_treated_day_2_(%)&quot;</from>
					<to>IS_Infectivity_Day_5</to>
				</connector>
				<connector uid="51" angle="205.866">
					<from>&quot;Share_of_IS_treated_day_2_(%)&quot;</from>
					<to>IS_Infectivity_Day_4</to>
				</connector>
				<connector uid="52" angle="191.468">
					<from>&quot;Share_of_IS_treated_day_2_(%)&quot;</from>
					<to>IS_Infectivity_Day_3</to>
				</connector>
				<aux color="#8000FF" font_color="#8000FF" x="487.667" y="1084.5" name="INS infectivity day 2"/>
				<aux color="#8000FF" font_color="#8000FF" x="615.667" y="1084.5" name="INS infectivity day 3"/>
				<aux color="#8000FF" font_color="#8000FF" x="724.667" y="1078.67" name="INS infectivity day 4"/>
				<aux color="#8000FF" font_color="#8000FF" x="837.667" y="1068.17" width="21" height="21" name="INS infectivity day 5"/>
				<aux color="#8000FF" font_color="#8000FF" x="949.667" y="1070.67" width="16" height="16" name="INS infectivity day 6"/>
				<aux color="#8000FF" font_color="#8000FF" x="1063.67" y="1078.67" name="INS infectivity day 7"/>
				<aux color="#8000FF" font_color="#8000FF" x="1171.67" y="1078.67" name="INS infectivity day 8"/>
				<aux color="#8000FF" font_color="#8000FF" x="791.667" y="1184.17" name="INS Relative infectivity"/>
				<connector uid="53" angle="222.797">
					<from>INS_infectivity_day_8</from>
					<to>INS_Relative_infectivity</to>
				</connector>
				<connector uid="54" angle="308.585">
					<from>INS_infectivity_day_2</from>
					<to>INS_Relative_infectivity</to>
				</connector>
				<connector uid="55" angle="219.92">
					<from>INS_infectivity_day_7</from>
					<to>INS_Relative_infectivity</to>
				</connector>
				<connector uid="56" angle="293.902">
					<from>INS_infectivity_day_3</from>
					<to>INS_Relative_infectivity</to>
				</connector>
				<connector uid="57" angle="249.305">
					<from>INS_infectivity_day_6</from>
					<to>INS_Relative_infectivity</to>
				</connector>
				<connector uid="58" angle="280.491">
					<from>INS_infectivity_day_4</from>
					<to>INS_Relative_infectivity</to>
				</connector>
				<connector uid="59" angle="252.474">
					<from>INS_infectivity_day_5</from>
					<to>INS_Relative_infectivity</to>
				</connector>
				<stock color="#8000FF" font_color="#8000FF" x="478.667" y="995.667" width="45" height="35" name="INS Day 2"/>
				<stock color="#8000FF" font_color="#8000FF" x="591.167" y="995.67" width="45" height="35" name="INS Day 3"/>
				<stock color="#8000FF" font_color="#8000FF" label_side="top" x="702.167" y="995.67" width="45" height="35" name="INS Day 4"/>
				<stock color="#8000FF" font_color="#8000FF" x="829.667" y="995.67" width="45" height="35" name="INS Day 5"/>
				<stock color="#8000FF" font_color="#8000FF" x="935.167" y="995.67" width="45" height="35" name="INS Day 6"/>
				<stock color="#8000FF" font_color="#8000FF" x="1038.17" y="995.67" width="45" height="35" name="INS Day 7"/>
				<stock color="#8000FF" font_color="#8000FF" x="1147.17" y="992.67" width="45" height="35" name="INS Day 8"/>
				<flow color="#8000FF" font_color="#8000FF" label_side="bottom" x="551.417" y="1013.17" name="INS Day 2t3">
					<pts>
						<pt x="523.667" y="1013.17"/>
						<pt x="591.167" y="1013.17"/>
					</pts>
				</flow>
				<flow color="#8000FF" font_color="#8000FF" x="663.167" y="1013.17" name="INS Day 3t4">
					<pts>
						<pt x="636.167" y="1013.17"/>
						<pt x="702.167" y="1013.17"/>
					</pts>
				</flow>
				<flow color="#8000FF" font_color="#8000FF" x="782.417" y="1013.17" name="INS Day 4t5">
					<pts>
						<pt x="747.167" y="1013.17"/>
						<pt x="829.667" y="1013.17"/>
					</pts>
				</flow>
				<flow color="#8000FF" font_color="#8000FF" x="898.917" y="1013.17" name="INS Day 5t6">
					<pts>
						<pt x="874.667" y="1013.17"/>
						<pt x="935.167" y="1013.17"/>
					</pts>
				</flow>
				<flow color="#8000FF" font_color="#8000FF" x="1003.17" y="1013.17" name="INS Day 6t7">
					<pts>
						<pt x="980.167" y="1013.17"/>
						<pt x="1038.17" y="1013.17"/>
					</pts>
				</flow>
				<flow color="#8000FF" font_color="#8000FF" x="1109.17" y="1011.67" name="INS Day 7t8">
					<pts>
						<pt x="1083.17" y="1011.67"/>
						<pt x="1147.17" y="1011.67"/>
					</pts>
				</flow>
				<flow color="#8000FF" font_color="#8000FF" x="1214.59" y="1006.17" name="INS Day 8 out">
					<pts>
						<pt x="1192.17" y="1006.17"/>
						<pt x="1249" y="1006.17"/>
					</pts>
				</flow>
				<connector uid="60" angle="266.987">
					<from>INS_Day_2</from>
					<to>INS_Relative_infectivity</to>
				</connector>
				<connector uid="61" angle="255.964">
					<from>INS_Day_3</from>
					<to>INS_Relative_infectivity</to>
				</connector>
				<connector uid="62" angle="291.396">
					<from>INS_Day_4</from>
					<to>INS_Relative_infectivity</to>
				</connector>
				<connector uid="63" angle="287.103">
					<from>INS_Day_5</from>
					<to>INS_Relative_infectivity</to>
				</connector>
				<connector uid="64" angle="264.71">
					<from>INS_Day_6</from>
					<to>INS_Relative_infectivity</to>
				</connector>
				<connector uid="65" angle="270.895">
					<from>INS_Day_7</from>
					<to>INS_Relative_infectivity</to>
				</connector>
				<connector uid="66" angle="255.217">
					<from>INS_Day_8</from>
					<to>INS_Relative_infectivity</to>
				</connector>
				<aux color="#8000FF" font_color="#8000FF" x="782.417" y="1050.67" name="Share of INS treated day 2 (%)"/>
				<connector uid="67" angle="355.886">
					<from>&quot;Share_of_INS_treated_day_2_(%)&quot;</from>
					<to>INS_infectivity_day_8</to>
				</connector>
				<connector uid="68" angle="320.595">
					<from>&quot;Share_of_INS_treated_day_2_(%)&quot;</from>
					<to>INS_infectivity_day_7</to>
				</connector>
				<connector uid="69" angle="350.922">
					<from>&quot;Share_of_INS_treated_day_2_(%)&quot;</from>
					<to>INS_infectivity_day_6</to>
				</connector>
				<connector uid="70" angle="336.933">
					<from>&quot;Share_of_INS_treated_day_2_(%)&quot;</from>
					<to>INS_infectivity_day_5</to>
				</connector>
				<connector uid="71" angle="205.866">
					<from>&quot;Share_of_INS_treated_day_2_(%)&quot;</from>
					<to>INS_infectivity_day_4</to>
				</connector>
				<connector uid="72" angle="191.468">
					<from>&quot;Share_of_INS_treated_day_2_(%)&quot;</from>
					<to>INS_infectivity_day_3</to>
				</connector>
				<connector uid="73" angle="186.547">
					<from>&quot;Share_of_INS_treated_day_2_(%)&quot;</from>
					<to>INS_infectivity_day_2</to>
				</connector>
				<flow color="#8000FF" font_color="#8000FF" x="374.5" y="1006.83" width="18" height="18" name="INS">
					<pts>
						<pt x="288.333" y="1015.83"/>
						<pt x="478.667" y="1015.83"/>
					</pts>
				</flow>
				<text_box font_weight="bold" font_size="18pt" uid="74" x="398" y="325.167" width="417.334" height="27.9999">Influenza healthcare-associated (HCAI)
Influenza healthcare-associated (HCAI)
Influenza healthcare-associated (HCAI)</text_box>
				<text_box font_weight="bold" font_size="18pt" uid="75" x="53.999" y="534.337" width="272.834" height="30.4132">Influenza suspected (IS)</text_box>
				<text_box font_weight="bold" font_size="18pt" uid="76" x="39.4162" y="1056.42" width="272.834" height="67.0799">Influenza non suspected (INS)</text_box>
				<connector uid="77" angle="353.172">
					<from>&quot;Vaccine_effectiveness_(%)&quot;</from>
					<to>HCAI</to>
				</connector>
				<aux x="325" y="883.333" name="Diagnostic accuracy\nat Emergency (%)"/>
				<connector uid="78" angle="29.7449">
					<from>&quot;Diagnostic_accuracy_at_Emergency_(%)&quot;</from>
					<to>IS</to>
				</connector>
				<connector uid="79" angle="293.822">
					<from>&quot;Diagnostic_accuracy_at_Emergency_(%)&quot;</from>
					<to>INS</to>
				</connector>
				<connector uid="80" angle="201.038">
					<from>
						<alias uid="81"/>
					</from>
					<to>HCAI</to>
				</connector>
				<connector uid="82" angle="182.783">
					<from>
						<alias uid="83"/>
					</from>
					<to>HCAI</to>
				</connector>
				<connector uid="84" angle="161.821">
					<from>
						<alias uid="85"/>
					</from>
					<to>HCAI</to>
				</connector>
				<connector uid="86" angle="293.199">
					<from>
						<alias uid="87"/>
					</from>
					<to>Infected_HCAI</to>
				</connector>
				<aux x="1141" y="573.75" name="IS sum"/>
				<connector uid="88" angle="21.0548">
					<from>IS_Day_3</from>
					<to>IS_sum</to>
				</connector>
				<connector uid="89" angle="20.7256">
					<from>IS_Day_4</from>
					<to>IS_sum</to>
				</connector>
				<connector uid="90" angle="26.9605">
					<from>IS_Day_5</from>
					<to>IS_sum</to>
				</connector>
				<connector uid="91" angle="33.1504">
					<from>IS_Day_6</from>
					<to>IS_sum</to>
				</connector>
				<connector uid="92" angle="43.9471">
					<from>IS_Day_7</from>
					<to>IS_sum</to>
				</connector>
				<connector uid="93" angle="84.6113">
					<from>IS_Day_8</from>
					<to>IS_sum</to>
				</connector>
				<aux x="1129.5" y="933.75" name="INS sum"/>
				<connector uid="94" angle="29.8891">
					<from>INS_Day_2</from>
					<to>INS_sum</to>
				</connector>
				<connector uid="95" angle="31.6892">
					<from>INS_Day_3</from>
					<to>INS_sum</to>
				</connector>
				<connector uid="96" angle="33.0507">
					<from>INS_Day_4</from>
					<to>INS_sum</to>
				</connector>
				<connector uid="97" angle="39.3911">
					<from>INS_Day_5</from>
					<to>INS_sum</to>
				</connector>
				<connector uid="98" angle="47.6619">
					<from>INS_Day_6</from>
					<to>INS_sum</to>
				</connector>
				<connector uid="99" angle="58.4702">
					<from>INS_Day_7</from>
					<to>INS_sum</to>
				</connector>
				<connector uid="100" angle="103.369">
					<from>INS_Day_8</from>
					<to>INS_sum</to>
				</connector>
				<aux x="1153.67" y="312" name="HCAI sum"/>
				<connector uid="101" angle="49.1849">
					<from>HCAI_Day_8</from>
					<to>HCAI_sum</to>
				</connector>
				<connector uid="102" angle="41.4434">
					<from>HCAI_Day_7</from>
					<to>HCAI_sum</to>
				</connector>
				<connector uid="103" angle="28.0725">
					<from>HCAI_Day_6</from>
					<to>HCAI_sum</to>
				</connector>
				<connector uid="104" angle="21.2505">
					<from>HCAI_Day_5</from>
					<to>HCAI_sum</to>
				</connector>
				<connector uid="105" angle="22.6359">
					<from>HCAI_Day_4</from>
					<to>HCAI_sum</to>
				</connector>
				<connector uid="106" angle="26.5651">
					<from>SU_Dag_3</from>
					<to>HCAI_sum</to>
				</connector>
				<connector uid="107" angle="27.8973">
					<from>HCAI_Day2</from>
					<to>HCAI_sum</to>
				</connector>
				<connector uid="108" angle="25.2011">
					<from>HCAI_Day_1</from>
					<to>HCAI_sum</to>
				</connector>
				<stock x="484.25" y="1435.83" name="Accumulated HCAI infected by Influenza suspected"/>
				<flow x="283.375" y="1432.5" name="Flow 1">
					<pts>
						<pt x="105" y="1432.5"/>
						<pt x="461.75" y="1432.5"/>
					</pts>
				</flow>
				<connector uid="109" angle="338.385">
					<from>
						<alias uid="110"/>
					</from>
					<to>Flow_1</to>
				</connector>
				<connector uid="111" angle="284.52">
					<from>
						<alias uid="112"/>
					</from>
					<to>Flow_1</to>
				</connector>
				<connector uid="113" angle="15.201">
					<from>
						<alias uid="114"/>
					</from>
					<to>Flow_1</to>
				</connector>
				<connector uid="115" angle="73.3879">
					<from>
						<alias uid="116"/>
					</from>
					<to>Flow_1</to>
				</connector>
				<connector uid="117" angle="158.039">
					<from>
						<alias uid="118"/>
					</from>
					<to>Flow_1</to>
				</connector>
				<connector uid="119" angle="182.121">
					<from>
						<alias uid="120"/>
					</from>
					<to>Flow_1</to>
				</connector>
				<connector uid="121" angle="195.487">
					<from>
						<alias uid="122"/>
					</from>
					<to>Flow_1</to>
				</connector>
				<stock x="991.08" y="1414.83" width="45" height="35" name="Accumulated HCAI\ninfected by Influenza not suspected"/>
				<flow x="812.707" y="1429" name="Flow 2">
					<pts>
						<pt x="634.333" y="1429"/>
						<pt x="991.08" y="1429"/>
					</pts>
				</flow>
				<connector uid="123" angle="338.225">
					<from>
						<alias uid="124"/>
					</from>
					<to>Flow_2</to>
				</connector>
				<connector uid="125" angle="284.519">
					<from>
						<alias uid="126"/>
					</from>
					<to>Flow_2</to>
				</connector>
				<connector uid="127" angle="15.1992">
					<from>
						<alias uid="128"/>
					</from>
					<to>Flow_2</to>
				</connector>
				<connector uid="129" angle="73.3884">
					<from>
						<alias uid="130"/>
					</from>
					<to>Flow_2</to>
				</connector>
				<connector uid="131" angle="158.039">
					<from>
						<alias uid="132"/>
					</from>
					<to>Flow_2</to>
				</connector>
				<connector uid="133" angle="182.121">
					<from>
						<alias uid="134"/>
					</from>
					<to>Flow_2</to>
				</connector>
				<connector uid="135" angle="226.717">
					<from>
						<alias uid="136"/>
					</from>
					<to>Flow_2</to>
				</connector>
				<connector uid="137" angle="195.487">
					<from>
						<alias uid="138"/>
					</from>
					<to>Flow_2</to>
				</connector>
				<stock x="666.25" y="1635.83" name="Accumulated HCAI infected by HCAI"/>
				<flow x="465.375" y="1632.5" name="Flow 3">
					<pts>
						<pt x="287" y="1632.5"/>
						<pt x="643.75" y="1632.5"/>
					</pts>
				</flow>
				<connector uid="139" angle="338.385">
					<from>
						<alias uid="140"/>
					</from>
					<to>Flow_3</to>
				</connector>
				<connector uid="141" angle="284.52">
					<from>
						<alias uid="142"/>
					</from>
					<to>Flow_3</to>
				</connector>
				<connector uid="143" angle="15.201">
					<from>
						<alias uid="144"/>
					</from>
					<to>Flow_3</to>
				</connector>
				<connector uid="145" angle="73.3879">
					<from>
						<alias uid="146"/>
					</from>
					<to>Flow_3</to>
				</connector>
				<connector uid="147" angle="158.039">
					<from>
						<alias uid="148"/>
					</from>
					<to>Flow_3</to>
				</connector>
				<connector uid="149" angle="182.121">
					<from>
						<alias uid="150"/>
					</from>
					<to>Flow_3</to>
				</connector>
				<connector uid="151" angle="226.718">
					<from>
						<alias uid="152"/>
					</from>
					<to>Flow_3</to>
				</connector>
				<connector uid="153" angle="195.487">
					<from>
						<alias uid="154"/>
					</from>
					<to>Flow_3</to>
				</connector>
				<stock color="blue" x="483.834" y="639.003" width="45" height="35" name="IS Day 2"/>
				<flow color="blue" label_side="bottom" x="550.501" y="654.5" name="IS Day 2t3">
					<pts>
						<pt x="528.834" y="654.5"/>
						<pt x="584.167" y="654.5"/>
					</pts>
				</flow>
				<connector uid="155" angle="15.3652">
					<from>IS_Day_2</from>
					<to>IS_sum</to>
				</connector>
				<aux x="511" y="727.33" name="IS Infectivity Day 2"/>
				<connector uid="156" angle="174.242">
					<from>&quot;Share_of_IS_treated_day_2_(%)&quot;</from>
					<to>IS_Infectivity_Day_2</to>
				</connector>
				<connector uid="157" angle="300.061">
					<from>IS_Infectivity_Day_2</from>
					<to>IS_Relative_Infectivity</to>
				</connector>
				<connector uid="158" angle="310.746">
					<from>IS_Day_2</from>
					<to>IS_Relative_Infectivity</to>
				</connector>
				<aux color="black" font_color="black" label_side="bottom" x="48.3336" y="632.167" width="18" height="18" name="Season 17--18"/>
				<aux x="1552.5" y="131.667" name="Viral titre level\nday 1 (untreated)"/>
				<aux x="1552.5" y="188.667" name="Viral titre level\nday 2 (untreated)"/>
				<aux x="1547.5" y="311.667" name="Viral titre level\nday 4 (untreated)"/>
				<aux x="1547.5" y="367" name="Viral titre level\nday 5 (untreated)"/>
				<aux x="1547.5" y="431.334" name="Viral titre level\nday 6 (untreated)"/>
				<aux x="1556.67" y="483.834" name="Viral titre level\nday 7 (untreated)"/>
				<aux x="1556.67" y="545" name="Viral titre level\nday 8 (untreated)"/>
				<aux x="1552.5" y="253.334" name="Viral titre level\nday 3 (untreated)"/>
				<aux x="1672.33" y="136.834" name="Viral titre level\nday 1 (treated)"/>
				<aux x="1672" y="194" name="Viral titre level\nday 2 (treated)"/>
				<aux x="1667" y="317" name="Viral titre level\nday 4 (treated)"/>
				<aux x="1667" y="372.333" name="Viral titre level\nday 5 (treated)"/>
				<aux x="1667" y="436.667" name="Viral titre level\nday 6 (treated)"/>
				<aux x="1676.17" y="489.167" name="Viral titre level\nday 7 (treated)"/>
				<aux x="1676.17" y="550.333" name="Viral titre level\nday 8 (treated)"/>
				<aux x="1663" y="249.667" width="18" height="18" name="Viral titre level\nday 3 (treated)"/>
				<aux x="1430.83" y="289" name="Average viral titre\nlevel treated day 1-8 (should be 1,00)"/>
				<connector uid="159" angle="208.81">
					<from>&quot;Viral_titre_level_day_1_(untreated)&quot;</from>
					<to>&quot;Average_viral_titre_level_treated_day_1-8_(should_be_1,00)&quot;</to>
				</connector>
				<connector uid="160" angle="219.045">
					<from>&quot;Viral_titre_level_day_2_(untreated)&quot;</from>
					<to>&quot;Average_viral_titre_level_treated_day_1-8_(should_be_1,00)&quot;</to>
				</connector>
				<connector uid="161" angle="165.066">
					<from>&quot;Viral_titre_level_day_3_(untreated)&quot;</from>
					<to>&quot;Average_viral_titre_level_treated_day_1-8_(should_be_1,00)&quot;</to>
				</connector>
				<connector uid="162" angle="156.369">
					<from>&quot;Viral_titre_level_day_4_(untreated)&quot;</from>
					<to>&quot;Average_viral_titre_level_treated_day_1-8_(should_be_1,00)&quot;</to>
				</connector>
				<connector uid="163" angle="157.636">
					<from>&quot;Viral_titre_level_day_5_(untreated)&quot;</from>
					<to>&quot;Average_viral_titre_level_treated_day_1-8_(should_be_1,00)&quot;</to>
				</connector>
				<connector uid="164" angle="149.686">
					<from>&quot;Viral_titre_level_day_6_(untreated)&quot;</from>
					<to>&quot;Average_viral_titre_level_treated_day_1-8_(should_be_1,00)&quot;</to>
				</connector>
				<connector uid="165" angle="145.018">
					<from>&quot;Viral_titre_level_day_7_(untreated)&quot;</from>
					<to>&quot;Average_viral_titre_level_treated_day_1-8_(should_be_1,00)&quot;</to>
				</connector>
				<connector uid="166" angle="143.158">
					<from>&quot;Viral_titre_level_day_8_(untreated)&quot;</from>
					<to>&quot;Average_viral_titre_level_treated_day_1-8_(should_be_1,00)&quot;</to>
				</connector>
				<connector uid="167" angle="260.656">
					<from>
						<alias uid="168"/>
					</from>
					<to>INS_infectivity_day_2</to>
				</connector>
				<connector uid="169" angle="55.7271">
					<from>
						<alias uid="170"/>
					</from>
					<to>INS_infectivity_day_2</to>
				</connector>
				<connector uid="171" angle="330.625">
					<from>
						<alias uid="172"/>
					</from>
					<to>INS_infectivity_day_3</to>
				</connector>
				<connector uid="173" angle="41.2837">
					<from>
						<alias uid="174"/>
					</from>
					<to>INS_infectivity_day_3</to>
				</connector>
				<connector uid="175" angle="357.049">
					<from>
						<alias uid="176"/>
					</from>
					<to>INS_infectivity_day_4</to>
				</connector>
				<connector uid="177" angle="348.227">
					<from>
						<alias uid="178"/>
					</from>
					<to>INS_infectivity_day_4</to>
				</connector>
				<connector uid="179" angle="192.375">
					<from>
						<alias uid="180"/>
					</from>
					<to>INS_infectivity_day_5</to>
				</connector>
				<connector uid="181" angle="79.6952">
					<from>
						<alias uid="182"/>
					</from>
					<to>INS_infectivity_day_5</to>
				</connector>
				<connector uid="183" angle="191.004">
					<from>
						<alias uid="184"/>
					</from>
					<to>INS_infectivity_day_6</to>
				</connector>
				<connector uid="185" angle="126.634">
					<from>
						<alias uid="186"/>
					</from>
					<to>INS_infectivity_day_6</to>
				</connector>
				<connector uid="187" angle="214.077">
					<from>
						<alias uid="188"/>
					</from>
					<to>INS_infectivity_day_7</to>
				</connector>
				<connector uid="189" angle="115.942">
					<from>
						<alias uid="190"/>
					</from>
					<to>INS_infectivity_day_7</to>
				</connector>
				<connector uid="191" angle="203.199">
					<from>
						<alias uid="192"/>
					</from>
					<to>INS_infectivity_day_8</to>
				</connector>
				<connector uid="193" angle="135.003">
					<from>
						<alias uid="194"/>
					</from>
					<to>INS_infectivity_day_8</to>
				</connector>
				<connector uid="195" angle="326.634">
					<from>
						<alias uid="196"/>
					</from>
					<to>IS_Infectivity_Day_2</to>
				</connector>
				<connector uid="197" angle="47.7263">
					<from>
						<alias uid="198"/>
					</from>
					<to>IS_Infectivity_Day_2</to>
				</connector>
				<connector uid="199" angle="65.4154">
					<from>
						<alias uid="200"/>
					</from>
					<to>IS_Infectivity_Day_3</to>
				</connector>
				<connector uid="201" angle="339.574">
					<from>
						<alias uid="202"/>
					</from>
					<to>IS_Infectivity_Day_3</to>
				</connector>
				<connector uid="203" angle="341.811">
					<from>
						<alias uid="204"/>
					</from>
					<to>IS_Infectivity_Day_4</to>
				</connector>
				<connector uid="205" angle="48.2705">
					<from>
						<alias uid="206"/>
					</from>
					<to>IS_Infectivity_Day_4</to>
				</connector>
				<connector uid="207" angle="204.341">
					<from>
						<alias uid="208"/>
					</from>
					<to>IS_Infectivity_Day_5</to>
				</connector>
				<connector uid="209" angle="117.753">
					<from>
						<alias uid="210"/>
					</from>
					<to>IS_Infectivity_Day_5</to>
				</connector>
				<connector uid="211" angle="203.391">
					<from>
						<alias uid="212"/>
					</from>
					<to>IS_Infectivity_Day_6</to>
				</connector>
				<connector uid="213" angle="121.159">
					<from>
						<alias uid="214"/>
					</from>
					<to>IS_Infectivity_Day_6</to>
				</connector>
				<connector uid="215" angle="214.019">
					<from>
						<alias uid="216"/>
					</from>
					<to>IS_Infectivity_Day_7</to>
				</connector>
				<connector uid="217" angle="48.3665">
					<from>
						<alias uid="218"/>
					</from>
					<to>IS_Infectivity_Day_7</to>
				</connector>
				<connector uid="219" angle="203.55">
					<from>
						<alias uid="220"/>
					</from>
					<to>IS_Infectivity_Day_8</to>
				</connector>
				<connector uid="221" angle="140.194">
					<from>
						<alias uid="222"/>
					</from>
					<to>IS_Infectivity_Day_8</to>
				</connector>
				<connector uid="223" angle="16.1892">
					<from>
						<alias uid="224"/>
					</from>
					<to>HCAI_Infectvity_Day_1</to>
				</connector>
				<connector uid="225" angle="61.4935">
					<from>
						<alias uid="226"/>
					</from>
					<to>HCAI_Infectvity_Day_1</to>
				</connector>
				<connector uid="227" angle="337.479">
					<from>
						<alias uid="228"/>
					</from>
					<to>HCAI_Infectvity_Day_2</to>
				</connector>
				<connector uid="229" angle="53.4711">
					<from>
						<alias uid="230"/>
					</from>
					<to>HCAI_Infectvity_Day_2</to>
				</connector>
				<connector uid="231" angle="344.407">
					<from>
						<alias uid="232"/>
					</from>
					<to>HCAI_Infectvity_Day_3</to>
				</connector>
				<connector uid="233" angle="60.5725">
					<from>
						<alias uid="234"/>
					</from>
					<to>HCAI_Infectvity_Day_3</to>
				</connector>
				<connector uid="235" angle="9.46232">
					<from>
						<alias uid="236"/>
					</from>
					<to>HCAI_Infectvity_Day_4</to>
				</connector>
				<connector uid="237" angle="39.1737">
					<from>
						<alias uid="238"/>
					</from>
					<to>HCAI_Infectvity_Day_4</to>
				</connector>
				<connector uid="239" angle="201.571">
					<from>
						<alias uid="240"/>
					</from>
					<to>HCAI_Infectvity_Day_5</to>
				</connector>
				<connector uid="241" angle="96.1702">
					<from>
						<alias uid="242"/>
					</from>
					<to>HCAI_Infectvity_Day_5</to>
				</connector>
				<connector uid="243" angle="212.381">
					<from>
						<alias uid="244"/>
					</from>
					<to>HCAI_Infectvity_Day_6</to>
				</connector>
				<connector uid="245" angle="111.801">
					<from>
						<alias uid="246"/>
					</from>
					<to>HCAI_Infectvity_Day_6</to>
				</connector>
				<connector uid="247" angle="195.945">
					<from>
						<alias uid="248"/>
					</from>
					<to>HCAI_Infectvity_Day_7</to>
				</connector>
				<connector uid="249" angle="128.157">
					<from>
						<alias uid="250"/>
					</from>
					<to>HCAI_Infectvity_Day_7</to>
				</connector>
				<connector uid="251" angle="204.944">
					<from>
						<alias uid="252"/>
					</from>
					<to>HCAI_Infectvity_Day_8</to>
				</connector>
				<connector uid="253" angle="133.904">
					<from>
						<alias uid="254"/>
					</from>
					<to>HCAI_Infectvity_Day_8</to>
				</connector>
				<aux x="575.167" y="185.5" name="Ratio non-flu\nreceiving prophylactic\nmedication (%)"/>
				<aux x="461.333" y="193.5" name="Prophylactic effectiveness (%)"/>
				<connector uid="255" angle="170.811">
					<from>&quot;Prophylactic_effectiveness_(%)&quot;</from>
					<to>HCAI</to>
				</connector>
				<connector uid="256" angle="208.028">
					<from>&quot;Ratio_non-flu_receiving_prophylactic_medication_(%)&quot;</from>
					<to>HCAI</to>
				</connector>
				<connector uid="257" angle="32.0054">
					<from>
						<alias uid="258"/>
					</from>
					<to>From_Emergency_not_influenza</to>
				</connector>
				<stock x="1271.5" y="649" name="Total IS"/>
				<stock color="#8000FF" font_color="#8000FF" x="1271.5" y="1006.17" name="Total INS"/>
				<stock color="#66FF66" font_color="#66FF66" x="1271.5" y="390" name="Total HCAI"/>
				<stock x="478.875" y="1318.16" name="Accumulated IS"/>
				<flow x="429.438" y="1319.17" name="Flow 5">
					<pts>
						<pt x="402.5" y="1319.17"/>
						<pt x="456.375" y="1319.17"/>
					</pts>
				</flow>
				<connector uid="259" angle="275.38">
					<from>
						<alias uid="260"/>
					</from>
					<to>Flow_5</to>
				</connector>
				<stock x="666.667" y="1308.16" name="Accumulated INS"/>
				<flow x="617.084" y="1312.5" name="Flow 6">
					<pts>
						<pt x="590" y="1312.5"/>
						<pt x="644.167" y="1312.5"/>
					</pts>
				</flow>
				<connector uid="261" angle="292.109">
					<from>
						<alias uid="262"/>
					</from>
					<to>Flow_6</to>
				</connector>
				<connector uid="263" angle="61.3895">
					<from>&quot;Total_#_influenza_patients_from_Emergency&quot;</from>
					<to>IS</to>
				</connector>
				<connector uid="264" angle="258.69">
					<from>&quot;Total_#_influenza_patients_from_Emergency&quot;</from>
					<to>INS</to>
				</connector>
				<stock x="936.667" y="1292.67" name="Acc IS Relative Infectivity"/>
				<flow x="878.333" y="1291.67" name="Flow 7">
					<pts>
						<pt x="842.5" y="1291.67"/>
						<pt x="914.167" y="1291.67"/>
					</pts>
				</flow>
				<connector uid="265" angle="321.009">
					<from>
						<alias uid="266"/>
					</from>
					<to>Flow_7</to>
				</connector>
				<connector uid="267" angle="226.718">
					<from>
						<alias uid="268"/>
					</from>
					<to>Flow_1</to>
				</connector>
				<connector uid="269" angle="116.899">
					<from>
						<alias uid="270"/>
					</from>
					<to>Flow_3</to>
				</connector>
				<connector uid="271" angle="170.91">
					<from>
						<alias uid="272"/>
					</from>
					<to>Flow_3</to>
				</connector>
				<connector uid="273" angle="137.712">
					<from>
						<alias uid="274"/>
					</from>
					<to>Flow_2</to>
				</connector>
				<connector uid="275" angle="72.8973">
					<from>
						<alias uid="276"/>
					</from>
					<to>Flow_2</to>
				</connector>
				<connector uid="277" angle="171.318">
					<from>
						<alias uid="278"/>
					</from>
					<to>Flow_1</to>
				</connector>
				<connector uid="279" angle="51.3402">
					<from>
						<alias uid="280"/>
					</from>
					<to>Flow_1</to>
				</connector>
				<aux x="73.3336" y="886" name="S1718"/>
				<aux x="73.3336" y="928" name="S1617"/>
				<aux x="198.166" y="739.5" name="Influenza season"/>
				<connector uid="281" angle="44.9984">
					<from>S1718</from>
					<to>Influenza_season</to>
				</connector>
				<connector uid="282" angle="56.4858">
					<from>S1617</from>
					<to>Influenza_season</to>
				</connector>
				<connector uid="283" angle="343.029">
					<from>&quot;Season_17--18&quot;</from>
					<to>Influenza_season</to>
				</connector>
				<connector uid="284" angle="346.504">
					<from>&quot;Season_16--17&quot;</from>
					<to>Influenza_season</to>
				</connector>
				<aux x="136.5" y="882" name="S1516"/>
				<aux x="136.5" y="923" name="S1415"/>
				<aux x="133.334" y="968" name="S1314"/>
				<connector uid="285" angle="63.4365">
					<from>S1516</from>
					<to>Influenza_season</to>
				</connector>
				<connector uid="286" angle="71.4249">
					<from>S1415</from>
					<to>Influenza_season</to>
				</connector>
				<connector uid="287" angle="74.1597">
					<from>S1314</from>
					<to>Influenza_season</to>
				</connector>
				<connector uid="288" angle="2.04556">
					<from>&quot;Season_14--15&quot;</from>
					<to>Influenza_season</to>
				</connector>
				<connector uid="289" angle="39.8071">
					<from>&quot;Season_13--14&quot;</from>
					<to>Influenza_season</to>
				</connector>
				<connector uid="290" angle="37.0171">
					<from>&quot;Season_15--16&quot;</from>
					<to>Influenza_season</to>
				</connector>
				<connector uid="291" angle="24.4723">
					<from>Influenza_season</from>
					<to>IS</to>
				</connector>
				<connector uid="292" angle="303.85">
					<from>Influenza_season</from>
					<to>INS</to>
				</connector>
				<aux color="black" font_color="black" x="64.3336" y="599" name="Season 18--19"/>
				<aux x="73.3336" y="845" name="S1819"/>
				<connector uid="293" angle="0">
					<from>&quot;Season_18--19&quot;</from>
					<to>Influenza_season</to>
				</connector>
				<connector uid="294" angle="64.9844">
					<from>S1819</from>
					<to>Influenza_season</to>
				</connector>
				<aux x="1159" y="87" name="Ratio infected - non-infected"/>
				<connector uid="295" angle="10.3048">
					<from>
						<alias uid="296"/>
					</from>
					<to>&quot;Ratio_infected_-_non-infected&quot;</to>
				</connector>
				<connector uid="297" angle="8.67317">
					<from>
						<alias uid="298"/>
					</from>
					<to>&quot;Ratio_infected_-_non-infected&quot;</to>
				</connector>
				<graphics_frame fill="none" uid="299" x="15.6667" y="1817.78" width="201.111" height="75.5556">
					<image width="403" height="141" size_to_parent="true">/Users/paulholmstrom/Documents/Arbetsdokument/Kunder/Sahlgrenska/Infektion/Review 1/CC by 4.0.png</image>
				</graphics_frame>
				<text_box uid="300" x="16" y="1900" width="318" height="87">This model is a companion to the paper
System dynamic modelling of healthcare-associated influenza - a tool for infection control
by
M. Sansone, P. Holmström, S. Hallberg, R. Nordén, L-M Andersson, J. Westin</text_box>
				<alias color="#108001" font_style="italic" font_color="#108001" uid="9" x="176.417" y="196.833" width="18" height="18">
					<of>IS</of>
				</alias>
				<alias color="#21FF06" font_style="italic" font_color="#21FF06" uid="81" x="510" y="231.833" width="18" height="18">
					<of>HCAI_Relative_Infectivity</of>
				</alias>
				<alias font_style="italic" uid="83" x="478.5" y="259.333" width="18" height="18">
					<of>IS_Relative_Infectivity</of>
				</alias>
				<alias color="#8000FF" font_style="italic" font_color="#8000FF" uid="85" x="434.333" y="286.833" width="18" height="18">
					<of>INS_Relative_infectivity</of>
				</alias>
				<alias color="#21FF06" font_style="italic" font_color="#21FF06" uid="87" x="134.333" y="1221.83" width="18" height="18">
					<of>HCAI</of>
				</alias>
				<alias color="black" font_style="italic" font_color="black" uid="114" x="188.5" y="1446.83" width="18" height="18">
					<of>&quot;Average_#_other_exposed_patients_in_shared_rooms&quot;</of>
				</alias>
				<alias color="black" font_style="italic" font_color="black" uid="116" x="256.375" y="1483.83" width="18" height="18">
					<of>Calibration_factor</of>
				</alias>
				<alias color="black" font_style="italic" font_color="black" uid="118" x="336.333" y="1471.83" width="18" height="18">
					<of>&quot;Vaccination_coverage_(%)&quot;</of>
				</alias>
				<alias color="black" font_style="italic" font_color="black" uid="120" x="391.667" y="1441.5" width="18" height="18">
					<of>&quot;Vaccine_effectiveness_(%)&quot;</of>
				</alias>
				<alias color="#108001" font_style="italic" font_color="#108001" uid="110" x="167" y="1377.5" width="45" height="35">
					<of>Not_influenza</of>
				</alias>
				<alias font_style="italic" uid="112" x="256.375" y="1354" width="18" height="18">
					<of>IS_Relative_Infectivity</of>
				</alias>
				<alias color="#21FF06" font_style="italic" font_color="#21FF06" uid="122" x="391.667" y="1391" width="18" height="18">
					<of>HCAI_Relative_Infectivity</of>
				</alias>
				<alias color="black" font_style="italic" font_color="black" uid="128" x="717.833" y="1443.33" width="18" height="18">
					<of>&quot;Average_#_other_exposed_patients_in_shared_rooms&quot;</of>
				</alias>
				<alias color="black" font_style="italic" font_color="black" uid="130" x="785.708" y="1480.33" width="18" height="18">
					<of>Calibration_factor</of>
				</alias>
				<alias color="black" font_style="italic" font_color="black" uid="132" x="865.666" y="1468.33" width="18" height="18">
					<of>&quot;Vaccination_coverage_(%)&quot;</of>
				</alias>
				<alias color="black" font_style="italic" font_color="black" uid="134" x="921" y="1438" width="18" height="18">
					<of>&quot;Vaccine_effectiveness_(%)&quot;</of>
				</alias>
				<alias color="#108001" font_style="italic" font_color="#108001" uid="124" x="696.333" y="1374" width="45" height="35">
					<of>Not_influenza</of>
				</alias>
				<alias font_style="italic" uid="126" x="785.708" y="1350.5" width="18" height="18">
					<of>IS_Relative_Infectivity</of>
				</alias>
				<alias color="#8000FF" font_style="italic" font_color="#8000FF" uid="136" x="874.5" y="1344.83" width="18" height="18">
					<of>INS_Relative_infectivity</of>
				</alias>
				<alias color="#21FF06" font_style="italic" font_color="#21FF06" uid="138" x="921" y="1387.5" width="18" height="18">
					<of>HCAI_Relative_Infectivity</of>
				</alias>
				<alias color="black" font_style="italic" font_color="black" uid="144" x="370.5" y="1646.83" width="18" height="18">
					<of>&quot;Average_#_other_exposed_patients_in_shared_rooms&quot;</of>
				</alias>
				<alias color="black" font_style="italic" font_color="black" uid="146" x="438.375" y="1683.83" width="18" height="18">
					<of>Calibration_factor</of>
				</alias>
				<alias color="black" font_style="italic" font_color="black" uid="148" x="518.333" y="1671.83" width="18" height="18">
					<of>&quot;Vaccination_coverage_(%)&quot;</of>
				</alias>
				<alias color="black" font_style="italic" font_color="black" uid="150" x="573.667" y="1641.5" width="18" height="18">
					<of>&quot;Vaccine_effectiveness_(%)&quot;</of>
				</alias>
				<alias color="#108001" font_style="italic" font_color="#108001" uid="140" x="349" y="1577.5" width="45" height="35">
					<of>Not_influenza</of>
				</alias>
				<alias font_style="italic" uid="142" x="438.375" y="1554" width="18" height="18">
					<of>IS_Relative_Infectivity</of>
				</alias>
				<alias color="#8000FF" font_style="italic" font_color="#8000FF" uid="152" x="527.167" y="1548.33" width="18" height="18">
					<of>INS_Relative_infectivity</of>
				</alias>
				<alias color="#21FF06" font_style="italic" font_color="#21FF06" uid="154" x="573.667" y="1591" width="18" height="18">
					<of>HCAI_Relative_Infectivity</of>
				</alias>
				<alias font_style="italic" label_side="left" uid="170" x="450.5" y="1116.83" width="18" height="18">
					<of>&quot;Viral_titre_level_day_2_(untreated)&quot;</of>
				</alias>
				<alias font_style="italic" label_side="left" uid="168" x="453.917" y="1046.67" width="18" height="18">
					<of>&quot;Viral_titre_level_day_2_(treated)&quot;</of>
				</alias>
				<alias font_style="italic" uid="172" x="564.333" y="1051.67" width="18" height="18">
					<of>&quot;Viral_titre_level_day_3_(treated)&quot;</of>
				</alias>
				<alias font_style="italic" uid="174" x="564.333" y="1112.67" width="18" height="18">
					<of>&quot;Viral_titre_level_day_3_(untreated)&quot;</of>
				</alias>
				<alias font_style="italic" uid="176" x="672.167" y="1051.67" width="18" height="18">
					<of>&quot;Viral_titre_level_day_4_(treated)&quot;</of>
				</alias>
				<alias font_style="italic" uid="178" x="414.167" y="1006.83" width="18" height="18">
					<of>&quot;Viral_titre_level_day_4_(untreated)&quot;</of>
				</alias>
				<alias font_style="italic" uid="180" x="885.167" y="1050.17" width="18" height="18">
					<of>&quot;Viral_titre_level_day_5_(treated)&quot;</of>
				</alias>
				<alias font_style="italic" uid="182" x="885.167" y="1120.17" width="18" height="18">
					<of>&quot;Viral_titre_level_day_5_(untreated)&quot;</of>
				</alias>
				<alias font_style="italic" uid="184" x="978.5" y="1061" width="18" height="18">
					<of>&quot;Viral_titre_level_day_6_(treated)&quot;</of>
				</alias>
				<alias font_style="italic" uid="186" x="978.5" y="1115.17" width="18" height="18">
					<of>&quot;Viral_titre_level_day_6_(untreated)&quot;</of>
				</alias>
				<alias font_style="italic" uid="188" x="1081.83" y="1046.83" width="18" height="18">
					<of>&quot;Viral_titre_level_day_7_(treated)&quot;</of>
				</alias>
				<alias font_style="italic" uid="190" x="1079.33" y="1117.67" width="18" height="18">
					<of>&quot;Viral_titre_level_day_7_(untreated)&quot;</of>
				</alias>
				<alias font_style="italic" uid="192" x="1204.33" y="1046.83" width="18" height="18">
					<of>&quot;Viral_titre_level_day_8_(treated)&quot;</of>
				</alias>
				<alias font_style="italic" uid="194" x="1212.67" y="1112.67" width="18" height="18">
					<of>&quot;Viral_titre_level_day_8_(untreated)&quot;</of>
				</alias>
				<alias font_style="italic" uid="196" x="464.333" y="689.333" width="18" height="18">
					<of>&quot;Viral_titre_level_day_2_(treated)&quot;</of>
				</alias>
				<alias font_style="italic" uid="198" x="464.333" y="761.833" width="18" height="18">
					<of>&quot;Viral_titre_level_day_2_(untreated)&quot;</of>
				</alias>
				<alias font_style="italic" uid="202" x="564.333" y="694.5" width="18" height="18">
					<of>&quot;Viral_titre_level_day_3_(treated)&quot;</of>
				</alias>
				<alias font_style="italic" uid="200" x="577.667" y="773.167" width="18" height="18">
					<of>&quot;Viral_titre_level_day_3_(untreated)&quot;</of>
				</alias>
				<alias font_style="italic" uid="204" x="665.167" y="694.5" width="18" height="18">
					<of>&quot;Viral_titre_level_day_4_(treated)&quot;</of>
				</alias>
				<alias font_style="italic" uid="206" x="663.5" y="768.5" width="18" height="18">
					<of>&quot;Viral_titre_level_day_4_(untreated)&quot;</of>
				</alias>
				<alias font_style="italic" uid="208" x="871" y="693.5" width="18" height="18">
					<of>&quot;Viral_titre_level_day_5_(treated)&quot;</of>
				</alias>
				<alias font_style="italic" uid="210" x="871.917" y="761.833" width="18" height="18">
					<of>&quot;Viral_titre_level_day_5_(untreated)&quot;</of>
				</alias>
				<alias font_style="italic" uid="212" x="978.5" y="695.5" width="18" height="18">
					<of>&quot;Viral_titre_level_day_6_(treated)&quot;</of>
				</alias>
				<alias font_style="italic" uid="214" x="978.5" y="755.167" width="18" height="18">
					<of>&quot;Viral_titre_level_day_6_(untreated)&quot;</of>
				</alias>
				<alias font_style="italic" uid="216" x="1083.5" y="687.667" width="18" height="18">
					<of>&quot;Viral_titre_level_day_7_(treated)&quot;</of>
				</alias>
				<alias font_style="italic" uid="218" x="1083.5" y="762.667" width="18" height="18">
					<of>&quot;Viral_titre_level_day_7_(untreated)&quot;</of>
				</alias>
				<alias font_style="italic" uid="220" x="1207.67" y="687.667" width="18" height="18">
					<of>&quot;Viral_titre_level_day_8_(treated)&quot;</of>
				</alias>
				<alias font_style="italic" uid="222" x="1204.33" y="755.167" width="18" height="18">
					<of>&quot;Viral_titre_level_day_8_(untreated)&quot;</of>
				</alias>
				<alias font_style="italic" uid="224" x="306" y="426.833" width="18" height="18">
					<of>&quot;Viral_titre_level_day_1_(treated)&quot;</of>
				</alias>
				<alias font_style="italic" uid="226" x="303.25" y="491.5" width="18" height="18">
					<of>&quot;Viral_titre_level_day_1_(untreated)&quot;</of>
				</alias>
				<alias font_style="italic" uid="228" x="429.333" y="426.833" width="18" height="18">
					<of>&quot;Viral_titre_level_day_2_(treated)&quot;</of>
				</alias>
				<alias font_style="italic" uid="230" x="434.333" y="501.833" width="18" height="18">
					<of>&quot;Viral_titre_level_day_2_(untreated)&quot;</of>
				</alias>
				<alias font_style="italic" uid="232" x="550.167" y="427.667" width="18" height="18">
					<of>&quot;Viral_titre_level_day_3_(treated)&quot;</of>
				</alias>
				<alias font_style="italic" uid="234" x="554.333" y="502.667" width="18" height="18">
					<of>&quot;Viral_titre_level_day_3_(untreated)&quot;</of>
				</alias>
				<alias font_style="italic" uid="236" x="658.5" y="434.333" width="18" height="18">
					<of>&quot;Viral_titre_level_day_4_(treated)&quot;</of>
				</alias>
				<alias font_style="italic" uid="238" x="656" y="513.5" width="18" height="18">
					<of>&quot;Viral_titre_level_day_4_(untreated)&quot;</of>
				</alias>
				<alias font_style="italic" uid="240" x="867.667" y="427.667" width="18" height="18">
					<of>&quot;Viral_titre_level_day_5_(treated)&quot;</of>
				</alias>
				<alias font_style="italic" uid="242" x="867.667" y="504.333" width="18" height="18">
					<of>&quot;Viral_titre_level_day_5_(untreated)&quot;</of>
				</alias>
				<alias font_style="italic" uid="244" x="976" y="426" width="18" height="18">
					<of>&quot;Viral_titre_level_day_6_(treated)&quot;</of>
				</alias>
				<alias font_style="italic" uid="246" x="977.667" y="493.5" width="18" height="18">
					<of>&quot;Viral_titre_level_day_6_(untreated)&quot;</of>
				</alias>
				<alias font_style="italic" uid="248" x="1096" y="424.333" width="18" height="18">
					<of>&quot;Viral_titre_level_day_7_(treated)&quot;</of>
				</alias>
				<alias font_style="italic" uid="250" x="1100.17" y="493.5" width="18" height="18">
					<of>&quot;Viral_titre_level_day_7_(untreated)&quot;</of>
				</alias>
				<alias font_style="italic" uid="252" x="1231" y="415.167" width="18" height="18">
					<of>&quot;Viral_titre_level_day_8_(treated)&quot;</of>
				</alias>
				<alias font_style="italic" uid="254" x="1231" y="491.5" width="18" height="18">
					<of>&quot;Viral_titre_level_day_8_(untreated)&quot;</of>
				</alias>
				<alias color="#8000FF" font_style="italic" font_color="#8000FF" uid="258" x="150.167" y="164.333" width="18" height="18">
					<of>INS</of>
				</alias>
				<alias color="#6666FF" font_style="italic" font_color="#6666FF" uid="260" x="420.438" y="1239.83" width="18" height="18">
					<of>IS</of>
				</alias>
				<alias color="#8000FF" font_style="italic" font_color="#8000FF" uid="262" x="591.833" y="1251" width="18" height="18">
					<of>INS</of>
				</alias>
				<alias font_style="italic" uid="266" x="837.667" y="1238.5" width="18" height="18">
					<of>IS_Relative_Infectivity</of>
				</alias>
				<alias color="#8000FF" font_style="italic" font_color="#8000FF" uid="268" x="345.167" y="1348.33" width="18" height="18">
					<of>INS_Relative_infectivity</of>
				</alias>
				<alias font_style="italic" uid="272" x="600.167" y="1685.17" width="18" height="18">
					<of>&quot;Prophylactic_effectiveness_(%)&quot;</of>
				</alias>
				<alias font_style="italic" uid="270" x="518.333" y="1726" width="18" height="18">
					<of>&quot;Ratio_non-flu_receiving_prophylactic_medication_(%)&quot;</of>
				</alias>
				<alias font_style="italic" uid="278" x="406" y="1489.83" width="18" height="18">
					<of>&quot;Prophylactic_effectiveness_(%)&quot;</of>
				</alias>
				<alias font_style="italic" uid="280" x="311.833" y="1513.5" width="18" height="18">
					<of>&quot;Ratio_non-flu_receiving_prophylactic_medication_(%)&quot;</of>
				</alias>
				<alias font_style="italic" uid="274" x="910.167" y="1516.83" width="18" height="18">
					<of>&quot;Prophylactic_effectiveness_(%)&quot;</of>
				</alias>
				<alias font_style="italic" uid="276" x="832.667" y="1541" width="18" height="18">
					<of>&quot;Ratio_non-flu_receiving_prophylactic_medication_(%)&quot;</of>
				</alias>
				<alias color="#108001" font_style="italic" font_color="#108001" uid="296" x="1033" y="30" width="18" height="18">
					<of>From_Emergency_not_influenza</of>
				</alias>
				<alias color="#21FF06" font_style="italic" font_color="#21FF06" uid="298" x="1032" y="96" width="18" height="18">
					<of>HCAI</of>
				</alias>
			</view>
			<view isee:name="Simulation" background="white" page_width="1440" page_height="900" isee:scroll_x="3.33333" isee:scroll_y="74.4444" zoom="90" home_view="true" type="interface">
				<style/>
				<slider font_weight="bold" num_ticks="6" x="350" y="182" width="325" height="40" min="0" max="1" isee:navigate_to="false" show_name="true">
					<entity name="Calibration_factor"/>
					<reset_to after="never">0</reset_to>
				</slider>
				<numeric_display color="white" font_weight="bold" x="350" y="20" width="325" height="30" isee:immediately_update_on_user_input="true" retain_ending_value="true" isee:navigate_to="false" show_name="true">
					<format precision="1"/>
					<entity name='"Accumulated_Hospital-associated_influenza_(HCAI)"'/>
				</numeric_display>
				<stacked_container x="707" y="383" width="360" height="360">
					<graph font_weight="bold" width="360" height="360" type="time_series" show_grid="false" isee:tick_type="none" include_units_in_legend="false" plot_numbers="false" isee:label_pie_slices="false" num_x_grid_lines="0" num_y_grid_lines="0" num_x_labels="5" num_y_labels="3" isee:fill_intensity="0.1" x_axis_title="Days" isee:allow_zero_axis="true" left_axis_title="Number" left_axis_multi_scale="false" left_axis_auto_scale="true" left_include_units="true" right_axis_multi_scale="false" right_axis_auto_scale="true" right_include_units="true">
						<plot color="blue" isee:keep_zero_visible="false" pen_width="2" index="0" show_y_axis="true">
							<entity name="IS"/>
						</plot>
						<plot color="red" isee:keep_zero_visible="false" pen_width="4" index="1" show_y_axis="true">
							<entity name="HCAI"/>
						</plot>
						<plot color="#8000FF" isee:keep_zero_visible="false" pen_width="2" index="2" show_y_axis="true">
							<entity name="INS"/>
						</plot>
					</graph>
				</stacked_container>
				<button background="#108040" font_weight="bold" font_color="white" font_size="18pt" label="Single run" x="393" y="714" width="151" height="30">
					<actions>
						<action>start</action>
					</actions>
				</button>
				<button background="#108040" font_weight="bold" font_color="white" font_size="18pt" label="Run Live (real time)" x="393" y="677" width="228" height="30">
					<actions>
						<action>start_stella_live</action>
					</actions>
				</button>
				<button label="" x="589" y="729">
					<actions>
						<action>stop_stella_live</action>
					</actions>
				</button>
				<stacked_container x="355.5" y="407" width="325" height="250">
					<graph isee:hide_border="true" width="325" height="250" type="time_series" show_grid="false" isee:tick_type="none" include_units_in_legend="false" plot_numbers="false" isee:label_pie_slices="false" num_x_grid_lines="0" num_y_grid_lines="0" num_x_labels="5" num_y_labels="3" title=" " isee:fill_intensity="0.1" x_axis_title="Days" isee:allow_zero_axis="true" left_axis_multi_scale="false" left_axis_auto_scale="true" left_include_units="true" right_axis_multi_scale="false" right_axis_auto_scale="true" right_include_units="true">
						<plot color="blue" isee:keep_zero_visible="false" pen_width="2" index="0" show_y_axis="true">
							<entity name='"Season_13--14"'/>
						</plot>
						<plot color="red" isee:keep_zero_visible="false" pen_width="2" index="1" show_y_axis="true">
							<entity name='"Season_14--15"'/>
						</plot>
						<plot color="#804002" isee:keep_zero_visible="false" pen_width="2" index="2" show_y_axis="true">
							<entity name='"Season_15--16"'/>
						</plot>
						<plot color="#008F44" isee:keep_zero_visible="false" pen_width="2" index="3" show_y_axis="true">
							<entity name='"Season_16--17"'/>
						</plot>
						<plot color="#FF7F00" isee:keep_zero_visible="false" pen_width="2" index="4" show_y_axis="true">
							<entity name='"Season_17--18"'/>
						</plot>
						<plot color="#7F00FF" isee:keep_zero_visible="false" pen_width="2" index="5" show_y_axis="true">
							<entity name='"Season_18--19"'/>
						</plot>
					</graph>
				</stacked_container>
				<slider font_weight="bold" num_ticks="5" x="357" y="267" width="300" height="40" increment="10" min="0" max="2000" isee:navigate_to="false" show_name="true">
					<entity name='"Total_#_influenza_patients_from_Emergency"'/>
					<reset_to after="never">0</reset_to>
				</slider>
				<slider font_weight="bold" font_color="#FC0280" num_ticks="4" x="10" y="41" width="325" height="40" min="0" max="3" isee:navigate_to="false" show_name="true">
					<entity name='"Average_#_other_exposed_patients_in_shared_rooms"'/>
					<reset_to after="never">0</reset_to>
				</slider>
				<slider font_weight="bold" font_color="blue" num_ticks="11" x="10" y="213" width="325" height="40" increment="1" min="0" max="100" isee:navigate_to="false" show_name="true">
					<entity name='"Vaccine_effectiveness_(%)"'/>
					<reset_to after="never">0</reset_to>
				</slider>
				<slider font_weight="bold" font_color="blue" num_ticks="11" x="10" y="153" width="325" height="40" increment="1" min="0" max="100" isee:navigate_to="false" show_name="true">
					<entity name='"Vaccination_coverage_(%)"'/>
					<reset_to after="never">0</reset_to>
				</slider>
				<text_box font_weight="bold" text_decoration="underline" font_color="#FC0280" font_size="14pt" x="10" y="10" width="75" height="20">Exposure</text_box>
				<text_box font_weight="bold" text_decoration="underline" font_color="blue" font_size="14pt" x="10" y="125" width="93" height="21">Susceptibility</text_box>
				<text_box font_weight="bold" text_decoration="underline" font_color="#108040" font_size="14pt" x="8" y="423" width="306" height="20">Actions</text_box>
				<slider font_weight="bold" font_color="#108040" num_ticks="11" x="8" y="453" width="325" height="40" increment="1" min="0" max="100" isee:navigate_to="false" show_name="true">
					<entity name='"Share_of_IS_treated_day_2_(%)"'/>
					<reset_to after="never">0</reset_to>
				</slider>
				<slider font_weight="bold" font_color="#108040" num_ticks="11" x="8" y="513" width="325" height="40" increment="1" min="0" max="100" isee:navigate_to="false" show_name="true">
					<entity name='"Share_of_INS_treated_day_2_(%)"'/>
					<reset_to after="never">0</reset_to>
				</slider>
				<slider font_weight="bold" font_color="#108040" num_ticks="11" x="8" y="573" width="325" height="40" increment="1" min="0" max="100" isee:navigate_to="false" show_name="true">
					<entity name='"Share_of_HCAI_treated_day_2_(%)"'/>
					<reset_to after="never">0</reset_to>
				</slider>
				<text_box font_weight="bold" text_decoration="underline" font_size="14pt" x="357" y="237" width="268" height="21">Variables</text_box>
				<slider font_weight="bold" font_color="#108040" num_ticks="11" x="8" y="633" width="325" height="40" increment="1" min="0" max="100" isee:navigate_to="false" show_name="true">
					<entity name='"Diagnostic_accuracy_at_Emergency_(%)"'/>
					<reset_to after="never">0</reset_to>
				</slider>
				<stacked_container x="707" y="24" width="360" height="360">
					<graph width="360" height="360" type="time_series" show_grid="true" isee:tick_type="none" include_units_in_legend="false" plot_numbers="false" isee:label_pie_slices="false" num_x_grid_lines="0" num_y_grid_lines="9" num_x_labels="5" num_y_labels="9" isee:fill_intensity="0.1" isee:allow_zero_axis="true" left_axis_multi_scale="false" left_axis_auto_scale="true" left_include_units="true" right_axis_multi_scale="false" right_axis_auto_scale="true" right_include_units="true">
						<plot color="blue" isee:keep_zero_visible="true" pen_width="2" index="0" show_y_axis="true">
							<entity name='"Ratio_infected_-_non-infected"'/>
						</plot>
					</graph>
				</stacked_container>
				<numeric_display color="white" font_weight="bold" x="350" y="51" width="325" height="30" isee:immediately_update_on_user_input="true" retain_ending_value="true" isee:navigate_to="false" show_name="true">
					<format precision="1"/>
					<entity name="Accumulated_HCAI_infected_by_Influenza_suspected"/>
				</numeric_display>
				<numeric_display color="white" font_weight="bold" x="350" y="82" width="325" height="30" isee:immediately_update_on_user_input="true" retain_ending_value="true" isee:navigate_to="false" show_name="true">
					<format precision="1"/>
					<entity name="Accumulated_HCAI_infected_by_Influenza_not_suspected"/>
				</numeric_display>
				<numeric_display color="white" font_weight="bold" x="350" y="112" width="325" height="25" isee:immediately_update_on_user_input="true" retain_ending_value="true" isee:navigate_to="false" show_name="true">
					<format precision="1"/>
					<entity name="Accumulated_HCAI_infected_by_HCAI"/>
				</numeric_display>
				<slider font_weight="bold" font_color="blue" num_ticks="11" x="10" y="273" width="325" height="40" increment="1" min="0" max="100" isee:navigate_to="false" show_name="true">
					<entity name='"Ratio_non-flu_receiving_prophylactic_medication_(%)"'/>
					<reset_to after="never">0</reset_to>
				</slider>
				<slider font_weight="bold" font_color="blue" num_ticks="11" x="10" y="333" width="325" height="40" increment="1" min="0" max="100" isee:navigate_to="false" show_name="true">
					<entity name='"Prophylactic_effectiveness_(%)"'/>
					<reset_to after="never">0</reset_to>
				</slider>
				<options font_weight="bold" appearance="radio-buttons" arrangement="horizontal" x="355.5" y="356" width="325" height="50">
					<entity name="S1314" title="Season 2013-14">
						<reset_to after="never">0</reset_to>
					</entity>
					<entity name="S1415" title="Season 2014-15">
						<reset_to after="never">0</reset_to>
					</entity>
					<entity name="S1516" title="Season 2015-16">
						<reset_to after="never">0</reset_to>
					</entity>
					<entity name="S1617" title="Season 2016-17">
						<reset_to after="never">0</reset_to>
					</entity>
					<entity name="S1718" title="Season 2017-18">
						<reset_to after="never">0</reset_to>
					</entity>
					<entity name="S1819" title="Season 2018-19">
						<reset_to after="never">0</reset_to>
					</entity>
				</options>
				<text_box font_weight="bold" text_align="center" x="448.5" y="336" width="128" height="16">Season selector</text_box>
				<isee:shape opacity="1" x="350" y="325" width="334" height="10" foreground="true" kind="hline"/>
				<isee:shape opacity="1" x="350" y="650" width="334" height="10" foreground="true" kind="hline"/>
				<isee:shape opacity="1" x="655" y="331" width="56" height="324" foreground="true" kind="vline"/>
				<isee:shape opacity="1" x="344" y="331" width="10" height="324" foreground="true" kind="vline"/>
				<numeric_display color="white" font_weight="bold" x="350" y="138" width="325" height="30" retain_ending_value="true" isee:navigate_to="false" show_name="true"/>
				<text_box font_size="14pt" x="1123" y="30" width="260" height="24">Click button to go to page</text_box>
				<button label="Welcome - introduction" x="1124" y="72" width="266" height="30">
					<actions>
						<action target="none">navigate</action>
					</actions>
				</button>
				<button label="Virus titre level by day" x="1124" y="99" width="266" height="30">
					<actions>
						<action target="none">navigate</action>
					</actions>
				</button>
				<button label="Patient flows and model structure" x="1124" y="129" width="266" height="30">
					<actions>
						<action target="none">navigate</action>
					</actions>
				</button>
				<button label="Enter your own hospital data and calibrate" x="1124" y="189" width="266" height="30">
					<actions>
						<action target="none">navigate</action>
					</actions>
				</button>
				<button label="Parameter definitions" x="1124" y="159" width="266" height="30">
					<actions>
						<action target="none">navigate</action>
					</actions>
				</button>
				<graphics_frame fill="none" x="13.6667" y="687.778" width="201.111" height="75.5556">
					<image width="403" height="141" size_to_parent="true" isee:fixed_aspect_ratio="true">/Users/paulholmstrom/Documents/Arbetsdokument/Kunder/Sahlgrenska/Infektion/Review 1/CC by 4.0.png</image>
				</graphics_frame>
				<text_box x="13.5" y="763.333" width="318" height="87">This model is a companion to the paper
System dynamic modelling of healthcare-associated influenza - a tool for infection control
by
M. Sansone, P. Holmström, S. Hallberg, R. Nordén, L-M Andersson, J. Westin</text_box>
			</view>
			<isee:templates>
				<view background="white" page_width="1440" page_height="900" type="template">
					<style/>
				</view>
			</isee:templates>
			<isee:stories/>
		</views>
	</model>
	<isee:controls>
		<isee:control priority="interactive" name='"Diagnostic_accuracy_at_Emergency_(%)"' value="40"/>
		<isee:control priority="interactive" name='"Prophylactic_effectiveness_(%)"' value="70"/>
		<isee:control priority="interactive" name='"Share_of_HCAI_treated_day_2_(%)"' value="0"/>
		<isee:control priority="interactive" name='"Share_of_INS_treated_day_2_(%)"' value="0"/>
		<isee:control priority="interactive" name='"Share_of_IS_treated_day_2_(%)"' value="60"/>
		<isee:control priority="interactive" name='"Total_#_influenza_patients_from_Emergency"' value="500"/>
		<isee:control priority="interactive" name="Calibration_factor" value="0.24092"/>
		<isee:control priority="interactive" name="S1314" value="0"/>
		<isee:control priority="interactive" name="S1415" value="0"/>
		<isee:control priority="interactive" name="S1516" value="0"/>
		<isee:control priority="interactive" name="S1617" value="1"/>
		<isee:control priority="interactive" name="S1718" value="0"/>
		<isee:control priority="interactive" name="S1819" value="0"/>
	</isee:controls>
</xmile>
